# Supplementary material for: Forelimb Kinematics of Rats Using XROMM, with Implications for Small Eutherians and Their Fossil Relatives
Source: PLoS One. 2016 Mar 2;11(3):e0149377. doi: 10.1371/journal.pone.0149377 (PMC4775064; doi:10.1371/journal.pone.0149377)
Supplement: S1 Data — (XLS) [file pone.0149377.s001.xls]

## Sheet: Sheet1
Rat	Trial	frame	t	StepCycle	ShTX	ShTY	ShTZ	ShRX	ShRY	ShRZ	ElbowTX	ElbowTY	ElbowTZ	ElbowRX	ElbowRY	ElbowRZ	RUTX	RUTY	RUTZ	RURX	RURY	RURZ		Trials = Trial #.Day#
1	1.2	600	0.004	55	0.944822	1.39322	2.82972	26.3216	-26.7945	10.1754	0.00124481	0.0008788	3.71702e-06	-0.180487	0.0484899	82.6729	-7.86714e-07	0.000187496	-0.000122822	179.999	-0.206862	0.616325		t = seconds
1	1.2	601	0.008	55.36	0.944083	1.39315	2.82055	26.2983	-26.7384	10.306	0.00124576	0.000880358	3.71771e-06	-0.180754	0.0485953	82.8028	-7.8595e-07	0.000187457	-0.000122888	179.959	-0.206653	0.617233		StepCycle = Percentage of Step Cycle
1	1.2	602	0.012	55.72	0.941838	1.39263	2.79564	26.2337	-26.5853	10.6237	0.00124653	0.000882055	3.71956e-06	-0.180964	0.0487399	82.9186	-7.83876e-07	0.000187342	-0.00012308	179.846	-0.206047	0.617943
1	1.2	603	0.016	56.08	0.938048	1.39123	2.75894	26.1355	-26.3579	11.0969	0.00124712	0.000883835	3.7223e-06	-0.181124	0.0489135	83.0212	-7.8082e-07	0.000187154	-0.000123386	179.663	-0.205071	0.618497		T = translation (cm)
1	1.2	604	0.02	56.44	0.932671	1.3885	2.71437	26.0116	-26.0788	11.6943	0.00124757	0.000885644	3.72562e-06	-0.181243	0.049106	83.1116	-7.77109e-07	0.000186897	-0.000123794	179.417	-0.203753	0.618934		R = rotation (degrees)
1	1.2	605	0.024	56.8	0.925667	1.384	2.66587	25.8697	-25.7706	12.3841	0.00124789	0.000887425	3.72924e-06	-0.181329	0.0493073	83.1906	-7.7307e-07	0.000186573	-0.000124293	179.114	-0.20212	0.619297		X, Y, Z = JCS Axis
1	1.2	606	0.028	57.16	0.916995	1.37729	2.61738	25.7177	-25.456	13.135	0.00124811	0.000889125	3.73286e-06	-0.181389	0.0495073	83.2592	-7.69031e-07	0.000186187	-0.000124871	178.759	-0.200202	0.619626		Sh = Shoulder JCS
1	1.2	607	0.032	57.52	0.906616	1.36793	2.57281	25.5633	-25.1577	13.9153	0.00124824	0.000890689	3.73618e-06	-0.181432	0.0496958	83.3184	-7.6532e-07	0.000185741	-0.000125518	178.357	-0.198025	0.619961		Elbow = Elbow JCS
1	1.2	608	0.036	57.88	0.894488	1.35547	2.53611	25.4144	-24.8982	14.6936	0.0012483	0.00089206	3.73892e-06	-0.181466	0.0498627	83.369	-7.62264e-07	0.000185238	-0.00012622	177.915	-0.195619	0.620344		RU = Radioulnar JCS
1	1.2	609	0.04	58.24	0.880572	1.33947	2.5112	25.2787	-24.7004	15.4383	0.00124833	0.000893184	3.74078e-06	-0.181498	0.0499979	83.412	-7.6019e-07	0.000184682	-0.000126968	177.438	-0.19301	0.620816
1	1.2	610	0.044	58.6	0.864826	1.31949	2.50203	25.1641	-24.5867	16.1178	0.00124833	0.000894006	3.74146e-06	-0.181536	0.0500912	83.4482	-7.59426e-07	0.000184076	-0.00012775	176.932	-0.190227	0.621417
1	1.2	611	0.048	58.96	0.848263	1.28932	2.50801	25.0724	-24.5321	16.7708	0.00124835	0.000894596	3.74156e-06	-0.181576	0.0501535	83.4782	-7.57489e-07	0.0001834	-0.000128598	176.377	-0.187164	0.622139
1	1.2	612	0.052	59.32	0.831488	1.24568	2.52499	24.9966	-24.4939	17.4514	0.00124838	0.000895068	3.74182e-06	-0.181608	0.0502034	83.5023	-7.52234e-07	0.000182641	-0.000129545	175.756	-0.183735	0.622934
1	1.2	613	0.056	59.68	0.813848	1.19249	2.55153	24.931	-24.4688	18.1514	0.00124844	0.000895436	3.74221e-06	-0.181633	0.0502422	83.521	-7.44489e-07	0.00018181	-0.000130574	175.08	-0.179994	0.623786
1	1.2	614	0.06	60.04	0.794691	1.13366	2.5862	24.8702	-24.4534	18.8626	0.0012485	0.000895712	3.74268e-06	-0.181652	0.0502714	83.5351	-7.35084e-07	0.000180917	-0.000131669	174.358	-0.175995	0.624678
1	1.2	615	0.064	60.4	0.773364	1.07313	2.62755	24.8086	-24.4442	19.5768	0.00124858	0.00089591	3.74319e-06	-0.181666	0.0502924	83.5451	-7.24849e-07	0.000179974	-0.000132813	173.6	-0.171793	0.625593
1	1.2	616	0.068	60.76	0.749215	1.01481	2.67416	24.7404	-24.4379	20.2857	0.00124865	0.000896043	3.7437e-06	-0.181675	0.0503064	83.5519	-7.14615e-07	0.000178992	-0.00013399	172.816	-0.167443	0.626513
1	1.2	617	0.072	61.12	0.721589	0.962617	2.72459	24.6602	-24.4311	20.9811	0.00124871	0.000896124	3.74417e-06	-0.18168	0.0503149	83.556	-7.0521e-07	0.000177982	-0.000135184	172.016	-0.162998	0.627423
1	1.2	618	0.076	61.48	0.689836	0.920484	2.77739	24.5623	-24.4203	21.6549	0.00124877	0.000896165	3.74456e-06	-0.181683	0.0503193	83.5581	-6.97465e-07	0.000176955	-0.00013638	171.21	-0.158514	0.628304
1	1.2	619	0.08	61.84	0.653304	0.892328	2.83114	24.4412	-24.4022	22.2988	0.00124881	0.00089618	3.74482e-06	-0.181684	0.0503209	83.5589	-6.92209e-07	0.000175923	-0.00013756	170.407	-0.154045	0.629141
1	1.2	620	0.084	62.2	0.611336	0.88207	2.88439	24.2913	-24.3734	22.9045	0.00124882	0.000896182	3.74492e-06	-0.181684	0.0503211	83.559	-6.90273e-07	0.000174897	-0.000138708	169.619	-0.149646	0.629917
1	1.2	621	0.088	62.56	0.564136	0.887749	2.94026	24.1413	-24.3442	23.4741	0.00124755	0.000890639	3.73027e-06	-0.181303	0.0497367	83.277	-6.85734e-07	0.000173811	-0.000139866	168.806	-0.145093	0.630606
1	1.2	622	0.092	62.92	0.512489	0.903163	3.00195	24.0131	-24.3242	24.0171	0.00124412	0.000876188	3.69534e-06	-0.180298	0.0482181	82.5403	-6.7491e-07	0.000172618	-0.000141066	167.941	-0.14022	0.6312
1	1.2	623	0.096	63.28	0.456624	0.925879	3.0682	23.8905	-24.3081	24.5368	0.00123913	0.000856102	3.65365e-06	-0.178873	0.0461173	81.5127	-6.61991e-07	0.000171356	-0.000142283	167.045	-0.13516	0.631709
1	1.2	624	0.1	63.64	0.396773	0.953462	3.13774	23.7574	-24.2909	25.0365	0.00123314	0.000833655	3.61873e-06	-0.177233	0.0437866	80.3582	-6.51167e-07	0.000170063	-0.00014349	166.142	-0.130051	0.632139
1	1.2	625	0.104	64	0.333166	0.983479	3.20928	23.5979	-24.2675	25.5193	0.00122674	0.000812117	3.60408e-06	-0.175585	0.041578	79.2408	-6.46628e-07	0.00016878	-0.000144659	165.254	-0.125027	0.6325
1	1.2	626	0.108	64.36	0.266029	1.0135	3.28156	23.3958	-24.2328	25.9888	0.00122015	0.000791482	3.58122e-06	-0.173953	0.0394816	78.1651	-6.41935e-07	0.000167494	-0.000145798	164.376	-0.120054	0.632784
1	1.2	627	0.112	64.72	0.195597	1.04108	3.3533	23.135	-24.1818	26.448	0.00121297	0.00076957	3.52671e-06	-0.1722	0.0372629	77.0219	-6.30747e-07	0.000166181	-0.000146924	163.492	-0.115041	0.632984
1	1.2	628	0.116	65.08	0.122097	1.0638	3.42322	22.7995	-24.1093	26.9002	0.00120489	0.00074639	3.46166e-06	-0.170288	0.0349364	75.8041	-6.17394e-07	0.000164856	-0.000148028	162.61	-0.110041	0.633113
1	1.2	629	0.12	65.44	0.0457562	1.07921	3.49007	22.3732	-24.0103	27.3488	0.00119558	0.000721948	3.40715e-06	-0.168182	0.0325167	74.5045	-6.06205e-07	0.000163533	-0.000149099	161.74	-0.105104	0.633182
1	1.2	630	0.124	65.8	-0.0331891	1.08489	3.55255	21.84	-23.8797	27.797	0.00118472	0.000696254	3.38429e-06	-0.165845	0.0300186	73.1161	-6.01513e-07	0.000162227	-0.000150128	160.89	-0.100283	0.633203
1	1.2	631	0.128	66.16	-0.125546	1.07707	3.60323	20.9095	-23.6613	28.2283	0.00117398	0.000670584	3.35017e-06	-0.163522	0.0275177	71.7411	-5.9709e-07	0.000160927	-0.000151118	160.054	-0.095543	0.633146
1	1.2	632	0.132	66.52	-0.236382	1.05733	3.64196	19.5018	-23.3207	28.626	0.00116359	0.000644929	3.26879e-06	-0.16124	0.0250042	70.3841	-5.86543e-07	0.000159622	-0.000152076	159.227	-0.0908504	0.632991
1	1.2	633	0.136	66.88	-0.356842	1.03122	3.67834	17.9164	-22.8853	28.9923	0.00115102	0.000617381	3.17167e-06	-0.158628	0.0223647	68.8919	-5.73955e-07	0.000158331	-0.000152997	158.416	-0.0862555	0.632764
1	1.2	634	0.14	67.24	-0.478085	1.0043	3.722	16.453	-22.3828	29.3296	0.00113376	0.000586024	3.0903e-06	-0.155314	0.0194854	67.1113	-5.63409e-07	0.000157069	-0.000153873	157.631	-0.081808	0.632487
1	1.2	635	0.144	67.6	-0.591273	0.982148	3.78257	15.411	-21.8407	29.6405	0.00110929	0.000548945	3.05617e-06	-0.150928	0.0162524	64.8889	-5.58986e-07	0.000155855	-0.0001547	156.88	-0.0775576	0.632187
1	1.2	636	0.148	67.96	-0.698184	0.962724	3.86395	14.8161	-21.2659	29.9502	0.00107404	0.00050094	2.97757e-06	-0.144839	0.012218	61.9225	-5.55279e-07	0.000154641	-0.0001555	156.136	-0.073356	0.631833
1	1.2	637	0.152	68.32	-0.80472	0.942323	3.95971	14.4553	-20.6401	30.2571	0.00102967	0.000443282	2.79014e-06	-0.137292	0.00745785	58.3143	-5.4644e-07	0.000153417	-0.000156278	155.395	-0.0691699	0.631409
1	1.2	638	0.156	68.68	-0.908201	0.923985	4.06403	14.27	-19.9528	30.5232	0.000981566	0.000383779	2.56642e-06	-0.129236	0.00264375	54.5175	-5.3589e-07	0.000152252	-0.000156999	154.694	-0.0652219	0.630959
1	1.2	639	0.16	69.04	-1.00593	0.910753	4.17103	14.2017	-19.1939	30.7107	0.000935087	0.000330248	2.37899e-06	-0.12162	-0.00155183	50.9859	-5.27052e-07	0.000151215	-0.000157625	154.075	-0.0617354	0.630528
1	1.2	640	0.164	69.4	-1.09524	0.905666	4.27487	14.1919	-18.353	30.7816	0.000895602	0.000290495	2.30039e-06	-0.115392	-0.00445712	48.1727	-5.23345e-07	0.000150377	-0.000158123	153.577	-0.0589331	0.630158
1	1.2	641	0.168	69.76	-1.18034	0.909392	4.38448	14.5167	-17.3615	30.5333	0.000859518	0.000260512	2.27585e-06	-0.10997	-0.00638181	45.8082	-5.22408e-07	0.00014965	-0.000158545	153.147	-0.05652	0.629815
1	1.2	642	0.172	70.12	-1.26647	0.919905	4.50858	15.3981	-16.2011	29.8301	0.000820698	0.000231437	2.20924e-06	-0.10427	-0.0080861	43.371	-5.19863e-07	0.000148915	-0.000158962	152.715	-0.0540943	0.629446
1	1.2	643	0.176	70.48	-1.35247	0.936209	4.64104	16.6969	-14.936	28.7345	0.000780679	0.000203799	2.11109e-06	-0.0984939	-0.00957427	40.9369	-5.16113e-07	0.00014819	-0.000159366	152.29	-0.0517187	0.629066
1	1.2	644	0.18	70.84	-1.43721	0.95731	4.77573	18.2742	-13.6307	27.309	0.000740999	0.000178127	1.9919e-06	-0.0928397	-0.0108505	38.5814	-5.11559e-07	0.000147497	-0.000159747	151.886	-0.049456	0.62869
1	1.2	645	0.184	71.2	-1.51951	0.98221	4.90652	19.9906	-12.3495	25.6164	0.0007032	0.000154951	1.8622e-06	-0.0875077	-0.0119189	36.3806	-5.06603e-07	0.000146855	-0.000160095	151.513	-0.0473692	0.628331
1	1.2	646	0.188	71.56	-1.59823	1.00991	5.02727	21.7069	-11.1569	23.7191	0.000668822	0.000134802	1.7325e-06	-0.0826975	-0.0127837	34.4101	-5.01647e-07	0.000146285	-0.0001604	151.182	-0.045521	0.628004
1	1.2	647	0.192	71.92	-1.67222	1.03943	5.13187	23.2842	-10.1171	21.6795	0.000639402	0.000118207	1.61331e-06	-0.0786085	-0.0134491	32.7455	-4.97093e-07	0.000145806	-0.000160655	150.905	-0.0439741	0.627725
1	1.2	648	0.196	72.28	-1.74032	1.06975	5.21417	24.5831	-9.29475	19.5605	0.000616482	0.000105699	1.51515e-06	-0.0754407	-0.0139192	31.4628	-4.93343e-07	0.00014544	-0.000160848	150.693	-0.0427914	0.627507
1	1.2	649	0.2	72.64	-1.80138	1.09989	5.26804	25.4644	-8.75411	17.4244	0.000601601	9.78048e-05	1.44855e-06	-0.0733936	-0.0141982	30.6376	-4.90798e-07	0.000145205	-0.000160971	150.558	-0.0420358	0.627366
1	1.2	650	0.204	73	-1.85424	1.12886	5.28736	25.7892	-8.55957	15.3338	0.000596298	9.50557e-05	1.42401e-06	-0.0726668	-0.0142903	30.3457	-4.89861e-07	0.000145122	-0.000161014	150.51	-0.0417699	0.627316
1	1.2	651	0.208	73.36	-1.89715	1.15835	5.26666	25.7184	-8.62225	13.1782	0.000598799	9.62681e-05	1.4355e-06	-0.073006	-0.0142565	30.4833	-4.90295e-07	0.00014519	-0.000160978	150.532	-0.0418896	0.627339
1	1.2	652	0.212	73.72	-1.93033	1.19037	5.20917	25.52	-8.7924	10.8311	0.000605838	9.97173e-05	1.46667e-06	-0.0739623	-0.0141574	30.8717	-4.91474e-07	0.000145376	-0.000160879	150.593	-0.0422306	0.627404
1	1.2	653	0.216	74.08	-1.95558	1.22431	5.12187	25.2152	-9.04315	8.33145	0.000616727	0.000105122	1.51262e-06	-0.0754445	-0.013996	31.4742	-4.93211e-07	0.000145651	-0.000160733	150.689	-0.0427659	0.627506
1	1.2	654	0.22	74.44	-1.97473	1.2596	5.01172	24.8248	-9.34762	5.71848	0.000630771	0.0001122	1.56841e-06	-0.0773607	-0.0137755	32.2543	-4.95321e-07	0.000145983	-0.000160556	150.815	-0.0434684	0.627638
1	1.2	655	0.224	74.8	-1.98958	1.29564	4.88568	24.3701	-9.67896	3.03109	0.000647279	0.000120669	1.62912e-06	-0.0796195	-0.0134991	33.1752	-4.97616e-07	0.000146346	-0.000160364	150.966	-0.044311	0.627795
1	1.2	656	0.228	75.16	-2.00195	1.33184	4.7507	23.872	-10.0103	0.308162	0.000665561	0.000130248	1.68984e-06	-0.0821295	-0.01317	34.2003	-4.99912e-07	0.000146708	-0.000160171	151.137	-0.0452669	0.62797
1	1.2	657	0.232	75.52	-2.01365	1.36761	4.61375	23.3516	-10.3148	-2.41105	0.000684924	0.000140655	1.74563e-06	-0.0847988	-0.0127913	35.293	-5.02021e-07	0.000147041	-0.000159994	151.324	-0.0463088	0.628159
1	1.2	658	0.236	75.88	-2.02649	1.40237	4.4818	22.8299	-10.5655	-5.08766	0.000704676	0.000151609	1.79157e-06	-0.0875362	-0.0123662	36.4166	-5.03758e-07	0.000147315	-0.000159848	151.521	-0.0474098	0.628354
1	1.2	659	0.24	76.24	-2.04229	1.43553	4.36179	22.328	-10.7357	-7.68277	0.000724127	0.000162827	1.82275e-06	-0.09025	-0.0118978	37.5345	-5.04937e-07	0.000147501	-0.00015975	151.724	-0.0485428	0.628551
1	1.2	660	0.244	76.6	-2.06286	1.46649	4.2607	21.8669	-10.7984	-10.1571	0.000742583	0.000174028	1.83423e-06	-0.0928486	-0.0113894	38.61	-5.05372e-07	0.000147569	-0.000159713	151.927	-0.0496807	0.628743
1	1.2	661	0.248	76.96	-2.08946	1.49348	4.17922	21.3208	-10.6533	-12.4534	0.000762626	0.000187073	1.87173e-06	-0.095708	-0.0107358	39.7992	-5.07202e-07	0.000147756	-0.000159551	152.165	-0.0510145	0.628963
1	1.2	662	0.252	77.32	-2.12017	1.51615	4.11091	20.6457	-10.3075	-14.5857	0.000786225	0.000203348	1.96116e-06	-0.0991133	-0.00986099	41.2216	-5.11568e-07	0.000148238	-0.000159165	152.464	-0.0526867	0.629232
1	1.2	663	0.256	77.68	-2.15207	1.53607	4.05204	19.9854	-9.89473	-16.6223	0.000811767	0.000221848	2.06789e-06	-0.102836	-0.00881204	42.7862	-5.16778e-07	0.000148903	-0.000158705	152.805	-0.054598	0.629531
1	1.2	664	0.26	78.04	-2.1822	1.55479	3.99886	19.4837	-9.5489	-18.6318	0.000837639	0.000241575	2.15732e-06	-0.106649	-0.00763597	44.4019	-5.21143e-07	0.000149635	-0.000158319	153.171	-0.0566492	0.629837
1	1.2	665	0.264	78.4	-2.20765	1.57388	3.94764	19.2845	-9.40386	-20.6826	0.000862231	0.000261527	2.19482e-06	-0.110325	-0.00637971	45.9777	-5.22974e-07	0.000150319	-0.000158157	153.543	-0.0587409	0.630131
1	1.2	666	0.268	78.76	-2.22975	1.59296	3.898	19.3913	-9.40665	-22.8352	0.000886335	0.000282253	2.23367e-06	-0.113977	-0.00501381	47.5575	-5.25317e-07	0.000150955	-0.00015802	153.919	-0.0608549	0.630424
1	1.2	667	0.272	79.12	-2.25047	1.61099	3.85244	19.646	-9.4262	-25.0442	0.000911029	0.000304421	2.32632e-06	-0.117757	-0.00350688	49.2022	-5.30904e-07	0.000151617	-0.000157663	154.311	-0.0630574	0.630731
1	1.2	668	0.276	79.48	-2.26778	1.62853	3.81151	19.95	-9.47927	-27.2186	0.000935119	0.000327207	2.4369e-06	-0.121495	-0.00190319	50.8456	-5.37574e-07	0.000152309	-0.000157162	154.723	-0.0653759	0.631033
1	1.2	669	0.28	79.84	-2.27965	1.64616	3.77579	20.2046	-9.58261	-29.2671	0.000957413	0.000349787	2.52954e-06	-0.125017	-0.000247267	52.4214	-5.43161e-07	0.000153035	-0.000156594	155.159	-0.0678372	0.631309
1	1.2	670	0.284	80.2	-2.28406	1.66444	3.74582	20.3114	-9.75297	-31.0988	0.000976718	0.000371337	2.56839e-06	-0.128151	0.00141661	53.8634	-5.45504e-07	0.000153797	-0.000156037	155.625	-0.0704686	0.631542
1	1.2	671	0.288	80.56	-2.27615	1.68502	3.71839	20.2603	-10.1074	-32.7803	0.000994147	0.000392649	2.58366e-06	-0.131059	0.00313271	55.2373	-5.47039e-07	0.000154586	-0.000155508	156.111	-0.0732146	0.631754
1	1.2	672	0.292	80.92	-2.25469	1.7084	3.69043	20.1214	-10.7073	-34.4352	0.00101147	0.000414789	2.62511e-06	-0.133989	0.00494876	56.6386	-5.51203e-07	0.000155387	-0.000154973	156.603	-0.0760001	0.631976
1	1.2	673	0.296	81.28	-2.22306	1.73341	3.66273	19.9168	-11.486	-36.0583	0.00102851	0.000437352	2.6862e-06	-0.136902	0.00682597	58.0459	-5.5734e-07	0.000156198	-0.00015443	157.102	-0.0788247	0.6322
1	1.2	674	0.3	81.64	-2.18465	1.75888	3.63612	19.6684	-12.377	-37.6442	0.00104506	0.00045993	2.76037e-06	-0.139761	0.0087256	59.438	-5.64792e-07	0.000157019	-0.000153877	157.608	-0.0816877	0.632419
1	1.2	675	0.304	82	-2.14286	1.78363	3.61139	19.398	-13.3137	-39.1874	0.00106093	0.000482117	2.84109e-06	-0.142525	0.0106086	60.7934	-5.72902e-07	0.000157847	-0.000153312	158.12	-0.0845881	0.632624
1	1.2	676	0.308	82.36	-2.10106	1.80651	3.58935	19.1277	-14.2294	-40.6826	0.00107594	0.000503506	2.9218e-06	-0.145157	0.0124363	62.0908	-5.81011e-07	0.000158682	-0.000152735	158.638	-0.0875252	0.63281
1	1.2	677	0.312	82.72	-2.06266	1.82634	3.57081	18.8792	-15.0576	-42.1245	0.00108989	0.000523691	2.99598e-06	-0.147616	0.0141699	63.3088	-5.88463e-07	0.00015952	-0.000152143	159.163	-0.0904984	0.632967
1	1.2	678	0.316	83.08	-2.03103	1.84195	3.55656	18.6746	-15.7316	-43.5075	0.00110258	0.000542264	3.05706e-06	-0.149865	0.0157703	64.4262	-5.946e-07	0.000160362	-0.000151535	159.694	-0.0935067	0.633089
1	1.2	679	0.32	83.44	-2.00957	1.85217	3.54743	18.5358	-16.1849	-44.8263	0.00111383	0.000558819	3.09851e-06	-0.151864	0.0171988	65.4214	-5.98765e-07	0.000161205	-0.00015091	160.231	-0.0965495	0.633168
1	1.2	680	0.324	83.8	-2.00166	1.85584	3.5442	18.4846	-16.3508	-46.0756	0.00112345	0.000572951	3.11378e-06	-0.153574	0.0184166	66.2732	-6.00299e-07	0.000162048	-0.000150266	160.774	-0.0996261	0.633196
1	1.2	681	0.328	84.16	-2.00517	1.85205	3.54915	18.5392	-16.2388	-47.2405	0.001131	0.000584098	3.11724e-06	-0.15492	0.0193785	66.9451	-6.01962e-07	0.000162898	-0.000149599	161.327	-0.102759	0.633186
1	1.2	682	0.332	84.52	-2.01484	1.84179	3.56286	18.6874	-15.9291	-48.3184	0.00113645	0.000592373	3.12664e-06	-0.1559	0.0200996	67.4389	-6.06477e-07	0.000163761	-0.000148909	161.892	-0.105963	0.633154
1	1.2	683	0.336	84.88	-2.02939	1.82666	3.58363	18.9059	-15.4607	-49.3222	0.00114019	0.000598375	3.14048e-06	-0.156586	0.0206317	67.7907	-6.13131e-07	0.000164632	-0.0001482	162.467	-0.109223	0.633099
1	1.2	684	0.34	85.24	-2.04752	1.80828	3.60976	19.1711	-14.8728	-50.2647	0.00114263	0.000602701	3.15729e-06	-0.15705	0.0210264	68.0369	-6.21211e-07	0.000165509	-0.000147475	163.048	-0.112522	0.633019
1	1.2	685	0.344	85.6	-2.06794	1.78829	3.63955	19.4598	-14.2047	-51.1587	0.00114418	0.000605951	3.17558e-06	-0.157365	0.0213356	68.2137	-6.30003e-07	0.000166386	-0.000146736	163.634	-0.115847	0.632913
1	1.2	686	0.348	85.96	-2.08938	1.76829	3.67129	19.7484	-13.4954	-52.0172	0.00114523	0.000608723	3.19387e-06	-0.157601	0.0216107	68.3572	-6.38795e-07	0.00016726	-0.000145986	164.222	-0.119183	0.632779
1	1.2	687	0.352	86.32	-2.11053	1.74992	3.70328	20.0137	-12.7841	-52.853	0.00114619	0.000611615	3.21068e-06	-0.157832	0.0219037	68.5037	-6.46875e-07	0.000168126	-0.00014523	164.81	-0.122514	0.632615
1	1.2	688	0.356	86.68	-2.13011	1.73479	3.73382	20.2321	-12.11	-53.6789	0.00114747	0.000615226	3.22453e-06	-0.15813	0.0222661	68.6894	-6.53528e-07	0.00016898	-0.000144469	165.395	-0.125826	0.632421
1	1.2	689	0.36	87.04	-2.14684	1.72452	3.76121	20.3803	-11.5122	-54.5078	0.00114946	0.000620156	3.23392e-06	-0.158567	0.0227498	68.9505	-6.58044e-07	0.000169819	-0.000143707	165.974	-0.129103	0.632193
1	1.2	690	0.364	87.4	-2.15942	1.72074	3.78375	20.4349	-11.0299	-55.3526	0.00115258	0.000627001	3.23738e-06	-0.159214	0.0234063	69.3232	-6.59707e-07	0.000170637	-0.000142947	166.546	-0.132331	0.631931
1	1.2	691	0.368	87.76	-2.16808	1.72446	3.80381	20.4346	-10.6313	-56.2071	0.0011566	0.000635488	3.24354e-06	-0.160037	0.0242129	69.7901	-6.61239e-07	0.000171442	-0.00014218	167.115	-0.135543	0.631629
1	1.2	692	0.372	88.12	-2.17429	1.73466	3.82449	20.4319	-10.2582	-57.0547	0.00116102	0.000644844	3.26027e-06	-0.160941	0.0251033	70.3038	-6.65398e-07	0.000172244	-0.000141397	167.689	-0.138775	0.631285
1	1.2	693	0.376	88.48	-2.17862	1.74983	3.84514	20.4248	-9.90989	-57.8921	0.00116572	0.000654918	3.28491e-06	-0.161909	0.0260638	70.8559	-6.71527e-07	0.000173039	-0.000140604	168.263	-0.142011	0.630903
1	1.2	694	0.38	88.84	-2.18162	1.76849	3.86513	20.4109	-9.58593	-58.7165	0.00117064	0.000665562	3.31483e-06	-0.162925	0.0270811	71.438	-6.7897e-07	0.000173825	-0.000139803	168.836	-0.145237	0.630489
1	1.2	695	0.384	89.2	-2.18385	1.78918	3.8838	20.388	-9.28571	-59.5247	0.00117567	0.000676627	3.3474e-06	-0.163973	0.0281417	72.0415	-6.87069e-07	0.000174598	-0.000139001	169.406	-0.148439	0.630048
1	1.2	696	0.388	89.56	-2.18588	1.8104	3.90052	20.3538	-9.00869	-60.3136	0.00118074	0.000687961	3.37996e-06	-0.165036	0.029232	72.6581	-6.95168e-07	0.000175356	-0.0001382	169.969	-0.151603	0.629584
1	1.2	697	0.392	89.92	-2.18826	1.83066	3.91464	20.3061	-8.7543	-61.0803	0.00118576	0.000699416	3.40988e-06	-0.166098	0.0303386	73.2792	-7.0261e-07	0.000176096	-0.000137406	170.523	-0.154714	0.629103
1	1.2	698	0.396	90.28	-2.19155	1.84849	3.92553	20.2427	-8.52197	-61.8215	0.00119062	0.000710844	3.43453e-06	-0.167142	0.031448	73.8965	-7.0874e-07	0.000176815	-0.000136623	171.067	-0.157758	0.628609
1	1.2	699	0.4	90.64	-2.19633	1.86241	3.93253	20.1612	-8.31116	-62.5344	0.00119526	0.000722093	3.45125e-06	-0.168152	0.0325468	74.5015	-7.12898e-07	0.000177511	-0.000135856	171.596	-0.160721	0.628108
1	1.2	700	0.404	91	-2.20314	1.87092	3.935	20.0595	-8.12129	-63.2157	0.00119958	0.000733014	3.45741e-06	-0.169111	0.0336213	75.0857	-7.14431e-07	0.00017818	-0.000135108	172.11	-0.163587	0.627604
1	1.2	701	0.408	91.36	-2.2129	1.87573	3.93447	19.8693	-7.96425	-63.8764	0.00120357	0.000743498	3.46293e-06	-0.170015	0.0346591	75.6436	-7.15616e-07	0.000178822	-0.000134375	172.609	-0.166365	0.627085
1	1.2	702	0.412	91.72	-2.22553	1.87958	3.9329	19.5458	-7.84723	-64.5256	0.00120734	0.000753637	3.4779e-06	-0.170877	0.0356671	76.181	-7.18832e-07	0.000179438	-0.000133649	173.096	-0.169071	0.626538
1	1.2	703	0.416	92.08	-2.24011	1.88257	3.93038	19.1218	-7.76261	-65.1578	0.00121092	0.000763588	3.49997e-06	-0.17171	0.0366611	76.7062	-7.23571e-07	0.000180031	-0.000132933	173.572	-0.171709	0.62597
1	1.2	704	0.42	92.44	-2.25573	1.88482	3.92698	18.6301	-7.70277	-65.7675	0.00121437	0.000773509	3.52677e-06	-0.172527	0.0376572	77.2275	-7.29326e-07	0.000180604	-0.000132225	174.037	-0.174284	0.625386
1	1.2	705	0.424	92.8	-2.27147	1.88644	3.92275	18.1032	-7.66013	-66.3492	0.00121774	0.000783555	3.55593e-06	-0.17334	0.0386711	77.7534	-7.35589e-07	0.000181159	-0.000131528	174.492	-0.176799	0.624791
1	1.2	706	0.428	93.16	-2.2864	1.88752	3.91777	17.5741	-7.62705	-66.8973	0.00122108	0.000793884	3.58509e-06	-0.174161	0.0397189	78.2921	-7.41852e-07	0.000181697	-0.000130841	174.938	-0.179258	0.624192
1	1.2	707	0.432	93.52	-2.29961	1.88818	3.91212	17.0753	-7.59594	-67.4064	0.00122443	0.000804653	3.61188e-06	-0.175004	0.0408164	78.8521	-7.47607e-07	0.000182221	-0.000130165	175.375	-0.181666	0.623593
1	1.2	708	0.436	93.88	-2.31019	1.88851	3.90586	16.6397	-7.55919	-67.8708	0.00122786	0.000816018	3.63395e-06	-0.17588	0.0419795	79.4416	-7.52347e-07	0.000182734	-0.000129502	175.804	-0.184025	0.623001
1	1.2	709	0.44	94.24	-2.31721	1.88864	3.89905	16.3	-7.50918	-68.2851	0.00123141	0.000828135	3.64892e-06	-0.176801	0.0432242	80.069	-7.55563e-07	0.000183237	-0.000128851	176.224	-0.18634	0.622421
1	1.2	710	0.444	94.6	-2.31975	1.88866	3.89178	16.0889	-7.4383	-68.6439	0.00123514	0.000841163	3.65444e-06	-0.177781	0.0445663	80.7426	-7.56748e-07	0.000183734	-0.000128213	176.637	-0.188615	0.621859
1	1.2	711	0.448	94.96	-2.31783	1.88599	3.88274	15.9662	-7.35222	-68.9427	0.00123924	0.000856009	3.67026e-06	-0.178881	0.046102	81.5076	-7.58263e-07	0.000184242	-0.000127611	177.025	-0.190743	0.621312
1	1.2	712	0.452	95.32	-2.31244	1.8786	3.87113	15.8679	-7.26197	-69.1849	0.00124371	0.000873254	3.70798e-06	-0.180126	0.0478978	82.3914	-7.61875e-07	0.000184739	-0.000127061	177.373	-0.192646	0.620779
1	1.2	713	0.456	95.68	-2.3042	1.86742	3.85778	15.7913	-7.16799	-69.3765	0.00124832	0.000892565	3.753e-06	-0.181474	0.0499257	83.3765	-7.66187e-07	0.000185168	-0.000126555	177.689	-0.194365	0.620267
1	1.2	714	0.46	96.04	-2.2937	1.85339	3.84353	15.7338	-7.07075	-69.5234	0.00125282	0.000913602	3.79072e-06	-0.182882	0.0521571	84.445	-7.69799e-07	0.000185468	-0.000126087	177.98	-0.195944	0.619782
1	1.2	715	0.464	96.4	-2.28154	1.83744	3.82919	15.6926	-6.97071	-69.6315	0.00125696	0.000936032	3.80654e-06	-0.184308	0.054564	85.5793	-7.71314e-07	0.000185581	-0.000125649	178.253	-0.197426	0.619333
1	1.2	716	0.468	96.76	-2.26831	1.8205	3.81561	15.6649	-6.86832	-69.7067	0.0012611	0.0009629	3.82583e-06	-0.185921	0.0574819	86.9312	-7.72277e-07	0.000185702	-0.000125202	178.509	-0.198818	0.618913
1	1.2	717	0.472	97.12	-2.25461	1.8035	3.8036	15.6482	-6.76404	-69.7549	0.00126539	0.000994429	3.87185e-06	-0.18775	0.0609296	88.5124	-7.74575e-07	0.000185989	-0.00012475	178.744	-0.200093	0.618518
1	1.2	718	0.476	97.48	-2.24103	1.78738	3.794	15.6396	-6.65833	-69.782	0.00126932	0.00102605	3.92677e-06	-0.18954	0.0644037	90.0952	-7.77318e-07	0.000186331	-0.000124353	178.956	-0.201237	0.618156
1	1.2	719	0.48	97.84	-2.22818	1.77306	3.78763	15.6364	-6.55165	-69.7939	0.00127234	0.0010532	3.97278e-06	-0.191036	0.0674011	91.452	-7.79616e-07	0.000186618	-0.000124071	179.141	-0.20224	0.617836
1	1.2	720	0.484	98.2	-2.21666	1.76149	3.78532	15.636	-6.44444	-69.7966	0.00127392	0.0010713	3.99208e-06	-0.191985	0.0694181	92.3548	-7.80579e-07	0.000186738	-0.000123963	179.298	-0.203087	0.617566
1	1.2	721	0.488	98.56	-2.20391	1.75471	3.78699	15.8132	-6.34665	-69.7857	0.00127448	0.00108111	3.99463e-06	-0.192464	0.0705236	92.8428	-7.80919e-07	0.00018678	-0.0001239	179.428	-0.203786	0.617343
1	1.2	722	0.492	98.92	-2.18895	1.75218	3.79317	16.28	-6.2552	-69.7565	0.00127482	0.00108706	4.00071e-06	-0.192755	0.0711942	93.1388	-7.81728e-07	0.00018688	-0.00012375	179.531	-0.204345	0.617162
1	1.2	723	0.496	99.28	-2.17466	1.75092	3.8056	16.9391	-6.15106	-69.7139	0.001275	0.00109012	4.00797e-06	-0.192904	0.0715385	93.2908	-7.82693e-07	0.000187	-0.000123572	179.607	-0.204754	0.617027
1	1.2	724	0.5	99.64	-2.16396	1.74793	3.826	17.6932	-6.01523	-69.6629	0.00127506	0.00109124	4.01405e-06	-0.192959	0.0716654	93.3468	-7.83502e-07	0.0001871	-0.000123422	179.654	-0.205006	0.616943
1	1.2	725	0.504	0	-2.15975	1.74023	3.85614	18.445	-5.82865	-69.6084	0.00127507	0.0010914	4.0166e-06	-0.192967	0.0716835	93.3548	-7.83841e-07	0.000187142	-0.000123359	179.67	-0.205092	0.616913
1	1.2	726	0.508	0.36	-2.17688	1.72387	3.90853	19.2972	-5.52598	-69.5707	0.00127493	0.00108847	4.0106e-06	-0.192827	0.0713519	93.2091	-7.83841e-07	0.000187142	-0.000123359	179.67	-0.205092	0.616913
1	1.2	727	0.512	0.72	-2.21906	1.70086	3.98203	20.3145	-5.11989	-69.5464	0.00127452	0.00108075	3.99631e-06	-0.192453	0.0704809	92.8254	-7.83841e-07	0.000187142	-0.000123359	179.67	-0.205092	0.616913
1	1.2	728	0.516	1.08	-2.27248	1.67709	4.05783	21.3432	-4.70842	-69.5053	0.00127386	0.00106987	3.97924e-06	-0.191917	0.069256	92.2841	-7.83841e-07	0.000187142	-0.000123359	179.67	-0.205092	0.616913
1	1.2	729	0.52	1.44	-2.32331	1.6585	4.1171	22.229	-4.38965	-69.4173	0.00127298	0.00105745	3.96494e-06	-0.19129	0.0678633	91.6654	-7.83841e-07	0.000187142	-0.000123359	179.67	-0.205092	0.616913
1	1.2	730	0.524	1.8	-2.35775	1.65099	4.14104	22.8181	-4.2616	-69.2521	0.0012719	0.00104511	3.95894e-06	-0.190644	0.0664882	91.0498	-7.83841e-07	0.000187142	-0.000123359	179.67	-0.205092	0.616913
1	1.2	731	0.528	2.16	-2.37288	1.66164	4.14064	23.0944	-4.28425	-68.9132	0.00127071	0.00103288	3.94886e-06	-0.189989	0.0651315	90.4399	-7.83841e-07	0.000187142	-0.000123359	179.67	-0.205092	0.616913
1	1.2	732	0.532	2.52	-2.37863	1.68705	4.13969	23.2055	-4.33826	-68.3703	0.00126939	0.0010197	3.9248e-06	-0.189279	0.0636695	89.7821	-7.83841e-07	0.000187142	-0.000123359	179.67	-0.205092	0.616913
1	1.2	733	0.536	2.88	-2.38041	1.71738	4.13855	23.2434	-4.40273	-67.6927	0.0012678	0.00100549	3.89609e-06	-0.188495	0.0621011	89.0724	-7.83841e-07	0.000187142	-0.000123359	179.67	-0.205092	0.616913
1	1.2	734	0.54	3.24	-2.38366	1.74279	4.1376	23.3	-4.45674	-66.9497	0.00126583	0.000990207	3.87204e-06	-0.187621	0.060425	88.3068	-7.83841e-07	0.000187142	-0.000123359	179.67	-0.205092	0.616913
1	1.2	735	0.544	3.6	-2.39381	1.75345	4.1372	23.4672	-4.47939	-66.2105	0.00126334	0.000973787	3.86195e-06	-0.186639	0.0586404	87.4812	-7.83841e-07	0.000187142	-0.000123359	179.67	-0.205092	0.616913
1	1.2	736	0.548	3.96	-2.41594	1.74576	4.14255	23.8211	-4.4784	-65.4117	0.00125972	0.000953481	3.84624e-06	-0.185364	0.0564557	86.4561	-7.83841e-07	0.000187142	-0.000123359	179.67	-0.205092	0.616913
1	1.2	737	0.552	4.32	-2.44643	1.72743	4.15531	24.3005	-4.47148	-64.507	0.00125508	0.000929326	3.80878e-06	-0.183808	0.0538714	85.2341	-7.83841e-07	0.000187142	-0.000123359	179.67	-0.205092	0.616913
1	1.2	738	0.556	4.68	-2.47765	1.70556	4.17054	24.7911	-4.45267	-63.5917	0.00125031	0.00090545	3.76407e-06	-0.182247	0.0513251	84.0246	-7.83841e-07	0.000187142	-0.000123359	179.67	-0.205092	0.616913
1	1.2	739	0.56	5.04	-2.50198	1.68723	4.1833	25.1787	-4.41606	-62.7611	0.00124628	0.000885979	3.72661e-06	-0.18096	0.0492539	83.037	-7.83841e-07	0.000187142	-0.000123359	179.67	-0.205092	0.616913
1	1.2	740	0.564	5.4	-2.51178	1.67954	4.18865	25.3488	-4.35569	-62.1104	0.0012439	0.000875037	3.7109e-06	-0.180223	0.048095	82.4806	-7.83841e-07	0.000187142	-0.000123359	179.67	-0.205092	0.616913
1	1.2	741	0.568	5.76	-2.5109	1.68067	4.18694	25.3707	-4.27772	-61.5841	0.00124267	0.000869887	3.71041e-06	-0.179863	0.0475544	82.2173	-7.83841e-07	0.000187142	-0.000123359	179.67	-0.205092	0.616913
1	1.2	742	0.572	6.12	-2.5083	1.68398	4.18194	25.3897	-4.19247	-61.063	0.00124149	0.000865031	3.70899e-06	-0.179522	0.0470452	81.9688	-7.83841e-07	0.000187142	-0.000123359	179.67	-0.205092	0.616913
1	1.2	743	0.576	6.48	-2.50407	1.68934	4.1739	25.4059	-4.10027	-60.547	0.00124036	0.000860453	3.70671e-06	-0.179199	0.0465659	81.7344	-7.83841e-07	0.000187142	-0.000123359	179.67	-0.205092	0.616913
1	1.2	744	0.58	6.84	-2.49831	1.69663	4.16306	25.4197	-4.00146	-60.0357	0.00123928	0.000856139	3.70363e-06	-0.178892	0.046115	81.5133	-7.83841e-07	0.000187142	-0.000123359	179.67	-0.205092	0.616913
1	1.2	745	0.584	7.2	-2.49112	1.70574	4.14963	25.4312	-3.89635	-59.5291	0.00123825	0.000852075	3.69982e-06	-0.178601	0.0456908	81.3048	-7.83841e-07	0.000187142	-0.000123359	179.67	-0.205092	0.616913
1	1.2	746	0.588	7.56	-2.48257	1.71655	4.13387	25.4406	-3.78528	-59.0268	0.00123726	0.000848244	3.69534e-06	-0.178325	0.0452917	81.1081	-7.83841e-07	0.000187142	-0.000123359	179.67	-0.205092	0.616913
1	1.2	747	0.592	7.92	-2.47276	1.72893	4.116	25.4481	-3.66858	-58.5286	0.00123631	0.000844633	3.69026e-06	-0.178063	0.0449162	80.9225	-7.83841e-07	0.000187142	-0.000123359	179.67	-0.205092	0.616913
1	1.2	748	0.596	8.28	-2.46178	1.74277	4.09626	25.4539	-3.54659	-58.0343	0.0012354	0.000841227	3.68466e-06	-0.177814	0.0445628	80.7473	-7.83841e-07	0.000187142	-0.000123359	179.67	-0.205092	0.616913
1	1.2	749	0.6	8.64	-2.44972	1.75795	4.07487	25.4583	-3.41962	-57.5437	0.00123452	0.000838011	3.67859e-06	-0.177577	0.0442297	80.5816	-7.83841e-07	0.000187142	-0.000123359	179.67	-0.205092	0.616913
1	1.2	750	0.604	9	-2.43668	1.77434	4.05209	25.4615	-3.28802	-57.0566	0.00123367	0.000834971	3.67211e-06	-0.177351	0.0439154	80.4248	-7.83841e-07	0.000187142	-0.000123359	179.67	-0.205092	0.616913
1	1.2	751	0.608	9.36	-2.42274	1.79182	4.02813	25.4636	-3.15211	-56.5727	0.00123286	0.00083209	3.66531e-06	-0.177135	0.0436184	80.2761	-7.83841e-07	0.000187142	-0.000123359	179.67	-0.205092	0.616913
1	1.2	752	0.612	9.72	-2.408	1.81028	4.00324	25.4649	-3.01221	-56.0918	0.00123207	0.000829356	3.65824e-06	-0.176928	0.0433371	80.1348	-7.83841e-07	0.000187142	-0.000123359	179.67	-0.205092	0.616913
1	1.2	753	0.616	10.08	-2.39254	1.8296	3.97764	25.4655	-2.86867	-55.6137	0.0012313	0.000826753	3.65097e-06	-0.17673	0.0430698	80	-7.83841e-07	0.000187142	-0.000123359	179.67	-0.205092	0.616913
1	1.2	754	0.62	10.44	-2.37646	1.84965	3.95158	25.4658	-2.72181	-55.1381	0.00123056	0.000824266	3.64357e-06	-0.176539	0.0428151	79.8711	-7.83841e-07	0.000187142	-0.000123359	179.67	-0.205092	0.616913
1	1.2	755	0.624	10.8	-2.35984	1.87032	3.92528	25.4658	-2.57195	-54.6649	0.00122983	0.00082188	3.6361e-06	-0.176354	0.0425712	79.7474	-7.83841e-07	0.000187142	-0.000123359	179.67	-0.205092	0.616913
1	1.2	756	0.628	11.16	-2.34279	1.89148	3.89898	25.4659	-2.41944	-54.1938	0.00122912	0.000819581	3.62863e-06	-0.176175	0.0423367	79.628	-7.83841e-07	0.000187142	-0.000123359	179.67	-0.205092	0.616913
1	1.2	757	0.632	11.52	-2.32538	1.91301	3.87291	25.4661	-2.26461	-53.7246	0.00122842	0.000817355	3.62123e-06	-0.176	0.04211	79.5122	-7.83841e-07	0.000187142	-0.000123359	179.67	-0.205092	0.616913
1	1.2	758	0.636	11.88	-2.30771	1.93481	3.84732	25.4668	-2.10776	-53.2571	0.00122773	0.000815185	3.61396e-06	-0.175829	0.0418894	79.3993	-7.83841e-07	0.000187142	-0.000123359	179.67	-0.205092	0.616913
1	1.2	759	0.64	12.24	-2.28988	1.95673	3.82242	25.468	-1.94926	-52.791	0.00122705	0.000813058	3.60689e-06	-0.17566	0.0416734	79.2886	-7.83841e-07	0.000187142	-0.000123359	179.67	-0.205092	0.616913
1	1.2	760	0.644	12.6	-2.27196	1.97868	3.79847	25.4702	-1.78942	-52.3261	0.00122637	0.000810959	3.60009e-06	-0.175493	0.0414605	79.1792	-7.83841e-07	0.000187142	-0.000123359	179.67	-0.205092	0.616913
1	1.2	761	0.648	12.96	-2.25406	2.00051	3.77568	25.4733	-1.62856	-51.8622	0.00122569	0.000808872	3.59362e-06	-0.175327	0.0412489	79.0705	-7.83841e-07	0.000187142	-0.000123359	179.67	-0.205092	0.616913
1	1.2	762	0.652	13.32	-2.23626	2.02213	3.7543	25.4777	-1.46702	-51.3991	0.00122501	0.000806784	3.58754e-06	-0.175161	0.0410372	78.9616	-7.83841e-07	0.000187142	-0.000123359	179.67	-0.205092	0.616913
1	1.2	763	0.656	13.68	-2.21866	2.04339	3.73456	25.4836	-1.30514	-50.9366	0.00122433	0.00080468	3.58194e-06	-0.174993	0.0408238	78.852	-7.83841e-07	0.000187142	-0.000123359	179.67	-0.205092	0.616913
1	1.2	764	0.66	14.04	-2.20134	2.0642	3.71668	25.4911	-1.14324	-50.4743	0.00122364	0.000802544	3.57686e-06	-0.174824	0.0406071	78.7407	-7.83841e-07	0.000187142	-0.000123359	179.67	-0.205092	0.616913
1	1.2	765	0.664	14.4	-2.1844	2.08441	3.70092	25.5005	-0.981649	-50.0122	0.00122294	0.000800362	3.57239e-06	-0.174651	0.0403854	78.627	-7.83841e-07	0.000187142	-0.000123359	179.67	-0.205092	0.616913
1	1.2	766	0.668	14.76	-2.16793	2.10392	3.6875	25.512	-0.820702	-49.5499	0.00122223	0.000798119	3.56857e-06	-0.174474	0.0401573	78.5103	-7.83841e-07	0.000187142	-0.000123359	179.67	-0.205092	0.616913
1	1.2	767	0.672	15.12	-2.15201	2.12261	3.67665	25.5257	-0.660719	-49.0873	0.00122151	0.000795801	3.56549e-06	-0.174293	0.0399211	78.3898	-7.83841e-07	0.000187142	-0.000123359	179.67	-0.205092	0.616913
1	1.2	768	0.676	15.48	-2.13675	2.14035	3.66861	25.542	-0.502045	-48.6241	0.00122077	0.000793393	3.56321e-06	-0.174105	0.0396753	78.2646	-7.83841e-07	0.000187142	-0.000123359	179.67	-0.205092	0.616913
1	1.2	769	0.68	15.84	-2.12222	2.15703	3.66362	25.5609	-0.344995	-48.1601	0.00122	0.000790879	3.56179e-06	-0.173911	0.0394182	78.1341	-7.83841e-07	0.000187142	-0.000123359	179.67	-0.205092	0.616913
1	1.2	770	0.684	16.2	-2.10852	2.17252	3.6619	25.5828	-0.18992	-47.6951	0.00121922	0.000788246	3.56131e-06	-0.173709	0.0391484	77.9976	-7.83841e-07	0.000187142	-0.000123359	179.67	-0.205092	0.616913
1	1.2	771	0.688	16.56	-2.09505	2.1869	3.66193	25.6154	-0.0277334	-47.2442	0.00121842	0.0007856	3.56028e-06	-0.173505	0.0388778	77.8603	-7.83841e-07	0.000187142	-0.000123359	179.67	-0.205092	0.616913
1	1.2	772	0.692	16.92	-2.08123	2.20037	3.66209	25.6666	0.149055	-46.8182	0.00121761	0.000783059	3.55747e-06	-0.173305	0.0386191	77.7279	-7.83841e-07	0.000187142	-0.000123359	179.67	-0.205092	0.616913
1	1.2	773	0.696	17.28	-2.06723	2.21297	3.66252	25.737	0.337765	-46.4107	0.00121682	0.00078062	3.55328e-06	-0.17311	0.038372	77.6004	-7.83841e-07	0.000187142	-0.000123359	179.67	-0.205092	0.616913
1	1.2	774	0.7	17.64	-2.05322	2.22476	3.66337	25.827	0.535771	-46.015	0.00121603	0.000778278	3.54809e-06	-0.17292	0.0381358	77.4777	-7.83841e-07	0.000187142	-0.000123359	179.67	-0.205092	0.616913
1	1.2	775	0.704	18	-2.03936	2.23579	3.66478	25.9371	0.740396	-45.6245	0.00121526	0.000776033	3.54231e-06	-0.172736	0.0379101	77.3597	-7.83841e-07	0.000187142	-0.000123359	179.67	-0.205092	0.616913
1	1.2	776	0.708	18.36	-2.02582	2.2461	3.66687	26.0679	0.948958	-45.2325	0.0012145	0.00077388	3.53633e-06	-0.172558	0.0376943	77.2464	-7.83841e-07	0.000187142	-0.000123359	179.67	-0.205092	0.616913
1	1.2	777	0.712	18.72	-2.01275	2.25575	3.66979	26.2197	1.15883	-44.8326	0.00121376	0.000771817	3.53054e-06	-0.172386	0.0374879	77.1377	-7.83841e-07	0.000187142	-0.000123359	179.67	-0.205092	0.616913
1	1.2	778	0.716	19.08	-2.00032	2.26478	3.67367	26.3931	1.36734	-44.418	0.00121305	0.000769842	3.52535e-06	-0.172221	0.0372905	77.0335	-7.83841e-07	0.000187142	-0.000123359	179.67	-0.205092	0.616913
1	1.2	779	0.72	19.44	-1.9887	2.27325	3.67866	26.5886	1.57181	-43.9823	0.00121238	0.000767951	3.52116e-06	-0.172063	0.0371015	76.9338	-7.83841e-07	0.000187142	-0.000123359	179.67	-0.205092	0.616913
1	1.2	780	0.724	19.8	-1.97804	2.2812	3.68488	26.8066	1.76961	-43.5187	0.00121173	0.000766141	3.51835e-06	-0.171912	0.0369204	76.8384	-7.83841e-07	0.000187142	-0.000123359	179.67	-0.205092	0.616913
1	1.2	781	0.728	20.16	-1.96852	2.28868	3.69249	27.0476	1.95805	-43.0207	0.00121113	0.00076441	3.51733e-06	-0.171769	0.0367467	76.7473	-7.83841e-07	0.000187142	-0.000123359	179.67	-0.205092	0.616913
1	1.2	782	0.732	20.52	-1.96144	2.29476	3.7071	27.3479	2.15431	-42.4638	0.00121066	0.00076302	3.51668e-06	-0.171656	0.0366067	76.6744	-7.83841e-07	0.000187142	-0.000123359	179.67	-0.205092	0.616913
1	1.2	783	0.736	20.88	-1.95734	2.29884	3.73209	27.7275	2.36982	-41.8412	0.00121036	0.000762115	3.51494e-06	-0.171584	0.0365151	76.6272	-7.83841e-07	0.000187142	-0.000123359	179.67	-0.205092	0.616913
1	1.2	784	0.74	21.24	-1.95525	2.30147	3.76423	28.1632	2.59328	-41.1733	0.00121017	0.000761518	3.51243e-06	-0.171537	0.0364543	76.5961	-7.83841e-07	0.000187142	-0.000123359	179.67	-0.205092	0.616913
1	1.2	785	0.744	21.6	-1.95421	2.30321	3.80028	28.6312	2.81334	-40.4803	0.00121003	0.00076105	3.50946e-06	-0.1715	0.0364066	76.5718	-7.83841e-07	0.000187142	-0.000123359	179.67	-0.205092	0.616913
1	1.2	786	0.748	21.96	-1.95323	2.3046	3.83702	29.1084	3.01877	-39.7824	0.00120985	0.000760532	3.50633e-06	-0.171458	0.0363543	76.5447	-7.83841e-07	0.000187142	-0.000123359	179.67	-0.205092	0.616913
1	1.2	787	0.752	22.32	-1.95134	2.30621	3.87123	29.571	3.19821	-39.0999	0.00120959	0.000759786	3.50335e-06	-0.171396	0.0362797	76.5054	-7.83841e-07	0.000187142	-0.000123359	179.67	-0.205092	0.616913
1	1.2	788	0.756	22.68	-1.94758	2.30859	3.89965	29.9956	3.34037	-38.453	0.00120916	0.000758634	3.50084e-06	-0.171298	0.036165	76.4444	-7.83841e-07	0.000187142	-0.000123359	179.67	-0.205092	0.616913
1	1.2	789	0.76	23.04	-1.94098	2.3123	3.91908	30.3588	3.43397	-37.862	0.00120851	0.000756896	3.49911e-06	-0.171149	0.0359927	76.3521	-7.83841e-07	0.000187142	-0.000123359	179.67	-0.205092	0.616913
1	1.2	790	0.764	23.4	-1.93055	2.31788	3.92627	30.6371	3.46768	-37.3472	0.00120756	0.000754394	3.49846e-06	-0.170934	0.0357449	76.2191	-7.83841e-07	0.000187142	-0.000123359	179.67	-0.205092	0.616913
1	1.2	791	0.768	23.76	-1.90767	2.32529	3.91331	30.8308	3.46739	-36.9024	0.00120615	0.000750725	3.49595e-06	-0.170617	0.035382	76.024	-7.83841e-07	0.000187142	-0.000123359	179.67	-0.205092	0.616913
1	1.2	792	0.772	24.12	-1.86694	2.33393	3.87803	30.9643	3.46534	-36.5034	0.00120428	0.000745853	3.48915e-06	-0.170195	0.0349005	75.7647	-7.83841e-07	0.000187142	-0.000123359	179.67	-0.205092	0.616913
1	1.2	793	0.776	24.48	-1.81231	2.34353	3.82584	31.0505	3.4598	-36.1428	0.00120208	0.000740153	3.47913e-06	-0.169701	0.0343373	75.4612	-7.83841e-07	0.000187142	-0.000123359	179.67	-0.205092	0.616913
1	1.2	794	0.78	24.84	-1.74771	2.35384	3.76214	31.1019	3.44899	-35.8136	0.0011997	0.000733998	3.46697e-06	-0.169167	0.0337294	75.1335	-7.83841e-07	0.000187142	-0.000123359	179.67	-0.205092	0.616913
1	1.2	795	0.784	25.2	-1.67708	2.36461	3.69233	31.1315	3.43119	-35.5083	0.00119729	0.000727764	3.45373e-06	-0.168625	0.0331138	74.8014	-7.83841e-07	0.000187142	-0.000123359	179.67	-0.205092	0.616913
1	1.2	796	0.788	25.56	-1.60435	2.37557	3.62183	31.152	3.40462	-35.2199	0.00119499	0.000721824	3.44049e-06	-0.168109	0.0325272	74.485	-7.83841e-07	0.000187142	-0.000123359	179.67	-0.205092	0.616913
1	1.2	797	0.792	25.92	-1.53347	2.38646	3.55604	31.176	3.36755	-34.9411	0.00119295	0.000716552	3.42832e-06	-0.167651	0.0320068	74.2042	-7.83841e-07	0.000187142	-0.000123359	179.67	-0.205092	0.616913
1	1.2	798	0.796	26.28	-1.46835	2.39702	3.50035	31.2163	3.31821	-34.6647	0.00119131	0.000712323	3.4183e-06	-0.167284	0.0315893	73.979	-7.83841e-07	0.000187142	-0.000123359	179.67	-0.205092	0.616913
1	1.2	799	0.8	26.64	-1.41295	2.407	3.46018	31.2858	3.25486	-34.3834	0.00119022	0.000709512	3.4115e-06	-0.167039	0.0313117	73.8292	-7.83841e-07	0.000187142	-0.000123359	179.67	-0.205092	0.616913
1	1.2	800	0.804	27	-1.37119	2.41614	3.44094	31.3971	3.17575	-34.09	0.00118983	0.000708491	3.409e-06	-0.166951	0.031211	73.7748	-7.83841e-07	0.000187142	-0.000123359	179.67	-0.205092	0.616913
1	1.2	801	0.808	27.36	-1.34311	2.42456	3.43463	31.5391	3.01581	-33.7871	0.00119029	0.00070972	3.41246e-06	-0.167056	0.0313328	73.8401	-7.83841e-07	0.000187142	-0.000123359	179.67	-0.205092	0.616913
1	1.2	802	0.812	27.72	-1.32463	2.43258	3.42958	31.6924	2.72714	-33.4836	0.00119159	0.000713146	3.42186e-06	-0.16735	0.0316723	74.022	-7.83841e-07	0.000187142	-0.000123359	179.67	-0.205092	0.616913
1	1.2	803	0.816	28.08	-1.31355	2.44027	3.42565	31.8573	2.33373	-33.1819	0.00119356	0.000718375	3.43571e-06	-0.167799	0.0321908	74.2997	-7.83841e-07	0.000187142	-0.000123359	179.67	-0.205092	0.616913
1	1.2	804	0.82	28.44	-1.30766	2.44771	3.42269	32.0342	1.85948	-32.8841	0.00119607	0.000725019	3.45253e-06	-0.168369	0.0328495	74.6525	-7.83841e-07	0.000187142	-0.000123359	179.67	-0.205092	0.616913
1	1.2	805	0.824	28.8	-1.30477	2.45495	3.42058	32.2235	1.32838	-32.5927	0.00119896	0.000732686	3.47083e-06	-0.169026	0.0336096	75.0595	-7.83841e-07	0.000187142	-0.000123359	179.67	-0.205092	0.616913
1	1.2	806	0.828	29.16	-1.30267	2.46206	3.41916	32.4254	0.764437	-32.3099	0.00120209	0.000740982	3.48914e-06	-0.169737	0.0344323	75.5	-7.83841e-07	0.000187142	-0.000123359	179.67	-0.205092	0.616913
1	1.2	807	0.832	29.52	-1.29916	2.4691	3.4183	32.6403	0.19152	-32.038	0.0012053	0.000749518	3.50596e-06	-0.170469	0.0352789	75.9531	-7.83841e-07	0.000187142	-0.000123359	179.67	-0.205092	0.616913
1	1.2	808	0.836	29.88	-1.29203	2.47615	3.41785	32.8685	-0.366362	-31.7792	0.00120846	0.000757902	3.51981e-06	-0.171186	0.0361106	76.3981	-7.83841e-07	0.000187142	-0.000123359	179.67	-0.205092	0.616913
1	1.2	809	0.84	30.24	-1.27908	2.48326	3.41769	33.1105	-0.885203	-31.536	0.0012114	0.000765742	3.52921e-06	-0.171857	0.0368885	76.8142	-7.83841e-07	0.000187142	-0.000123359	179.67	-0.205092	0.616913
1	1.2	810	0.844	30.6	-1.25811	2.4905	3.41767	33.3665	-1.34114	-31.3106	0.00121399	0.000772648	3.53267e-06	-0.172447	0.037574	77.1805	-7.83841e-07	0.000187142	-0.000123359	179.67	-0.205092	0.616913
1	1.2	811	0.848	30.96	-1.22996	2.49846	3.42725	33.6719	-1.74487	-31.1344	0.00121577	0.000777875	3.54233e-06	-0.172873	0.0381004	77.4547	-7.83841e-07	0.000187142	-0.000123359	179.67	-0.205092	0.616913
1	1.2	812	0.852	31.32	-1.1974	2.50739	3.45327	34.0459	-2.12719	-31.0222	0.00121654	0.00078011	3.54338e-06	-0.173053	0.0383264	77.5717	-7.83841e-07	0.000187142	-0.000123359	179.67	-0.205092	0.616913
1	1.2	813	0.856	31.68	-1.16107	2.51687	3.49162	34.4648	-2.49431	-30.9521	0.00121736	0.000782367	3.54621e-06	-0.173235	0.0385545	77.6898	-7.83841e-07	0.000187142	-0.000123359	179.67	-0.205092	0.616913
1	1.2	814	0.86	32.04	-1.12165	2.52647	3.53818	34.9049	-2.85235	-30.9017	0.00121819	0.000784596	3.5503e-06	-0.173414	0.0387799	77.8064	-7.83841e-07	0.000187142	-0.000123359	179.67	-0.205092	0.616913
1	1.2	815	0.864	32.4	-1.07978	2.53576	3.58885	35.3424	-3.20739	-30.8491	0.00121899	0.00078675	3.55515e-06	-0.173587	0.0389978	77.9191	-7.83841e-07	0.000187142	-0.000123359	179.67	-0.205092	0.616913
1	1.2	816	0.868	32.76	-1.03613	2.54432	3.63952	35.7536	-3.56565	-30.7719	0.00121973	0.000788783	3.56026e-06	-0.17375	0.0392035	78.0254	-7.83841e-07	0.000187142	-0.000123359	179.67	-0.205092	0.616913
1	1.2	817	0.872	33.12	-0.991347	2.55172	3.68609	36.1147	-3.93324	-30.6481	0.00122037	0.000790646	3.56511e-06	-0.173899	0.0393921	78.1229	-7.83841e-07	0.000187142	-0.000123359	179.67	-0.205092	0.616913
1	1.2	818	0.876	33.48	-0.946099	2.55754	3.72443	36.402	-4.31627	-30.4555	0.00122087	0.000792293	3.5692e-06	-0.174031	0.0395588	78.2089	-7.83841e-07	0.000187142	-0.000123359	179.67	-0.205092	0.616913
1	1.2	819	0.88	33.84	-0.901036	2.56134	3.75045	36.5918	-4.72093	-30.172	0.0012212	0.000793676	3.57202e-06	-0.174141	0.039699	78.2811	-7.83841e-07	0.000187142	-0.000123359	179.67	-0.205092	0.616913
1	1.2	820	0.884	34.2	-0.856818	2.5627	3.76004	36.6604	-5.15334	-29.7754	0.00122132	0.000794747	3.57308e-06	-0.174226	0.0398077	78.337	-7.83841e-07	0.000187142	-0.000123359	179.67	-0.205092	0.616913
1	1.2	821	0.888	34.56	-0.812016	2.55681	3.74783	36.6243	-5.626	-29.2606	0.00122135	0.000795559	3.57323e-06	-0.174288	0.0398869	78.3777	-7.83841e-07	0.000187142	-0.000123359	179.67	-0.205092	0.616913
1	1.2	822	0.892	34.92	-0.765139	2.54058	3.714	36.521	-6.1396	-28.6467	0.00122142	0.00079621	3.57364e-06	-0.174333	0.0399445	78.4072	-7.83841e-07	0.000187142	-0.000123359	179.67	-0.205092	0.616913
1	1.2	823	0.896	35.28	-0.716785	2.51617	3.66271	36.3579	-6.68231	-27.9482	0.00122153	0.000796717	3.57425e-06	-0.174364	0.0399845	78.4278	-7.83841e-07	0.000187142	-0.000123359	179.67	-0.205092	0.616913
1	1.2	824	0.9	35.64	-0.667549	2.48573	3.59815	36.1427	-7.24231	-27.1792	0.00122166	0.000797098	3.57498e-06	-0.174385	0.0400109	78.4413	-7.83841e-07	0.000187142	-0.000123359	179.67	-0.205092	0.616913
1	1.2	825	0.904	36	-0.618014	2.45141	3.52448	35.8827	-7.80794	-26.3539	0.0012218	0.000797371	3.57578e-06	-0.174398	0.0400279	78.4501	-7.83841e-07	0.000187142	-0.000123359	179.67	-0.205092	0.616913
1	1.2	826	0.908	36.36	-0.568776	2.41537	3.44588	35.5854	-8.36737	-25.4866	0.00122194	0.000797553	3.57658e-06	-0.174407	0.0400395	78.456	-7.83841e-07	0.000187142	-0.000123359	179.67	-0.205092	0.616913
1	1.2	827	0.912	36.72	-0.520432	2.37978	3.36655	35.2583	-8.90877	-24.5917	0.00122207	0.000797664	3.57731e-06	-0.174415	0.0400496	78.4612	-7.83841e-07	0.000187142	-0.000123359	179.67	-0.205092	0.616913
1	1.2	828	0.916	37.08	-0.473564	2.34677	3.29063	34.909	-9.42048	-23.6832	0.00122218	0.000797721	3.57792e-06	-0.174425	0.0400625	78.4678	-7.83841e-07	0.000187142	-0.000123359	179.67	-0.205092	0.616913
1	1.2	829	0.92	37.44	-0.428768	2.31851	3.22231	34.5448	-9.89067	-22.7754	0.00122225	0.000797742	3.57833e-06	-0.17444	0.040082	78.4778	-7.83841e-07	0.000187142	-0.000123359	179.67	-0.205092	0.616913
1	1.2	830	0.924	37.8	-0.38664	2.29716	3.16577	34.1733	-10.3075	-21.8828	0.00122228	0.000797745	3.57848e-06	-0.174463	0.0401124	78.4934	-7.83841e-07	0.000187142	-0.000123359	179.67	-0.205092	0.616913
1	1.2	831	0.928	38.16	-0.348611	2.28152	3.11493	33.7735	-10.6925	-20.9701	0.00122232	0.00079775	3.57869e-06	-0.174487	0.0401429	78.509	-7.83841e-07	0.000187142	-0.000123359	179.67	-0.205092	0.616913
1	1.2	832	0.932	38.52	-0.31487	2.26868	3.06207	33.3261	-11.0695	-20.0031	0.00122242	0.00079778	3.57928e-06	-0.174503	0.0401634	78.5195	-7.83841e-07	0.000187142	-0.000123359	179.67	-0.205092	0.616913
1	1.2	833	0.936	38.88	-0.284133	2.25825	3.00893	32.841	-11.431	-18.9975	0.00122257	0.000797861	3.58014e-06	-0.174515	0.0401787	78.5273	-7.83841e-07	0.000187142	-0.000123359	179.67	-0.205092	0.616913
1	1.2	834	0.94	39.24	-0.255105	2.24983	2.95724	32.3277	-11.7692	-17.9683	0.00122276	0.00079802	3.58119e-06	-0.174527	0.0401938	78.5351	-7.83841e-07	0.000187142	-0.000123359	179.67	-0.205092	0.616913
1	1.2	835	0.944	39.6	-0.226502	2.24302	2.90875	31.7961	-12.0765	-16.9313	0.00122296	0.000798282	3.58233e-06	-0.174542	0.0402134	78.5451	-7.83841e-07	0.000187142	-0.000123359	179.67	-0.205092	0.616913
1	1.2	836	0.948	39.96	-0.197039	2.23742	2.86518	31.2561	-12.3451	-15.9018	0.00122316	0.000798673	3.58347e-06	-0.174564	0.0402424	78.5599	-7.83841e-07	0.000187142	-0.000123359	179.67	-0.205092	0.616913
1	1.2	837	0.952	40.32	-0.165422	2.23262	2.82827	30.7174	-12.5674	-14.895	0.00122334	0.000799219	3.58452e-06	-0.174597	0.0402857	78.5821	-7.83841e-07	0.000187142	-0.000123359	179.67	-0.205092	0.616913
1	1.2	838	0.956	40.68	-0.130367	2.22823	2.79976	30.1897	-12.7357	-13.9266	0.00122349	0.000799945	3.58538e-06	-0.174646	0.0403481	78.614	-7.83841e-07	0.000187142	-0.000123359	179.67	-0.205092	0.616913
1	1.2	839	0.96	41.04	-0.0905891	2.22385	2.78139	29.6829	-12.8424	-13.012	0.0012236	0.000800877	3.58596e-06	-0.174712	0.0404344	78.6582	-7.83841e-07	0.000187142	-0.000123359	179.67	-0.205092	0.616913
1	1.2	840	0.964	41.4	-0.0447933	2.21907	2.77487	29.2068	-12.8796	-12.1665	0.00122363	0.000802042	3.58618e-06	-0.174801	0.0405496	78.7171	-7.83841e-07	0.000187142	-0.000123359	179.67	-0.205092	0.616913
1	1.2	841	0.968	41.76	0.00816668	2.21492	2.77704	28.7381	-12.8781	-11.3983	0.00122389	0.000803886	3.5887e-06	-0.174947	0.040737	78.8132	-7.83841e-07	0.000187142	-0.000123359	179.67	-0.205092	0.616913
1	1.2	842	0.972	42.12	0.0675884	2.21235	2.78345	28.2539	-12.871	-10.696	0.00122462	0.000806769	3.59553e-06	-0.175175	0.0410299	78.9634	-7.83841e-07	0.000187142	-0.000123359	179.67	-0.205092	0.616913
1	1.2	843	0.976	42.48	0.132001	2.21092	2.79399	27.7641	-12.8543	-10.0454	0.00122575	0.00081058	3.60561e-06	-0.175475	0.0414176	79.1617	-7.83841e-07	0.000187142	-0.000123359	179.67	-0.205092	0.616913
1	1.2	844	0.98	42.84	0.199917	2.21019	2.80853	27.2789	-12.8238	-9.43262	0.0012272	0.000815208	3.61784e-06	-0.175836	0.0418897	79.4022	-7.83841e-07	0.000187142	-0.000123359	179.67	-0.205092	0.616913
1	1.2	845	0.984	43.2	0.269847	2.2097	2.82694	26.8081	-12.7756	-8.84377	0.0012289	0.000820545	3.63115e-06	-0.176249	0.0424354	79.6791	-7.83841e-07	0.000187142	-0.000123359	179.67	-0.205092	0.616913
1	1.2	846	0.988	43.56	0.340324	2.20899	2.84912	26.3618	-12.7057	-8.26471	0.00123078	0.00082648	3.64446e-06	-0.176703	0.0430442	79.9865	-7.83841e-07	0.000187142	-0.000123359	179.67	-0.205092	0.616913
1	1.2	847	0.992	43.92	0.409858	2.20763	2.87492	25.9501	-12.61	-7.68152	0.00123276	0.000832903	3.6567e-06	-0.177187	0.0437054	80.3184	-7.83841e-07	0.000187142	-0.000123359	179.67	-0.205092	0.616913
1	1.2	848	0.996	44.28	0.476961	2.20516	2.90423	25.5829	-12.4845	-7.08025	0.00123477	0.000839704	3.66677e-06	-0.177692	0.0444086	80.6691	-7.83841e-07	0.000187142	-0.000123359	179.67	-0.205092	0.616913
1	1.2	849	1	44.64	0.540164	2.20113	2.93693	25.2702	-12.3252	-6.4468	0.00123674	0.000846773	3.67361e-06	-0.178207	0.0451431	81.0325	-7.83841e-07	0.000187142	-0.000123359	179.67	-0.205092	0.616913
1	1.2	850	1.004	45	0.597978	2.19509	2.97289	25.0221	-12.1281	-5.76724	0.00123859	0.000854001	3.67612e-06	-0.178721	0.0458982	81.403	-7.83841e-07	0.000187142	-0.000123359	179.67	-0.205092	0.616913
1	1.2	851	1.008	45.36	0.650648	2.17841	3.01569	24.8493	-11.88	-5.02922	0.00124043	0.000861485	3.68025e-06	-0.17925	0.0466817	81.7858	-7.83841e-07	0.000187142	-0.000123359	179.67	-0.205092	0.616913
1	1.2	852	1.012	45.72	0.699859	2.14535	3.06743	24.7445	-11.5779	-4.24022	0.0012424	0.000869395	3.69146e-06	-0.179812	0.0475089	82.1904	-7.83841e-07	0.000187142	-0.000123359	179.67	-0.205092	0.616913
1	1.2	853	1.016	46.08	0.746263	2.09983	3.12581	24.6907	-11.2326	-3.41636	0.00124447	0.000877727	3.70797e-06	-0.180403	0.0483806	82.6163	-7.83841e-07	0.000187142	-0.000123359	179.67	-0.205092	0.616913
1	1.2	854	1.02	46.44	0.790513	2.04577	3.1885	24.6709	-10.8553	-2.57377	0.0012466	0.000886474	3.72803e-06	-0.181018	0.0492972	83.0629	-7.83841e-07	0.000187142	-0.000123359	179.67	-0.205092	0.616913
1	1.2	855	1.024	46.8	0.833275	1.98706	3.25321	24.668	-10.4569	-1.72832	0.00124877	0.000895634	3.74985e-06	-0.181656	0.05026	83.5299	-7.83841e-07	0.000187142	-0.000123359	179.67	-0.205092	0.616913
1	1.2	856	1.028	47.16	0.875202	1.92762	3.31761	24.6652	-10.0482	-0.896151	0.00125094	0.0009052	3.77167e-06	-0.18231	0.0512694	84.0169	-7.83841e-07	0.000187142	-0.000123359	179.67	-0.205092	0.616913
1	1.2	857	1.032	47.52	0.916946	1.87138	3.37939	24.6454	-9.64039	-0.0933792	0.00125308	0.000915168	3.79173e-06	-0.182978	0.0523262	84.5233	-7.83841e-07	0.000187142	-0.000123359	179.67	-0.205092	0.616913
1	1.2	858	1.036	47.88	0.959173	1.82222	3.43625	24.5915	-9.24427	0.664097	0.00125516	0.000925533	3.80824e-06	-0.183657	0.0534314	85.0487	-7.83841e-07	0.000187142	-0.000123359	179.67	-0.205092	0.616913
1	1.2	859	1.04	48.24	1.00254	1.78408	3.48586	24.4867	-8.87087	1.36015	0.00125715	0.000936291	3.81945e-06	-0.184341	0.0545856	85.5928	-7.83841e-07	0.000187142	-0.000123359	179.67	-0.205092	0.616913
1	1.2	860	1.044	48.6	1.04769	1.76085	3.52591	24.3139	-8.53117	1.97869	0.00125902	0.000947435	3.82357e-06	-0.185028	0.0557894	86.1549	-7.83841e-07	0.000187142	-0.000123359	179.67	-0.205092	0.616913
1	1.2	861	1.048	48.96	1.09618	1.74909	3.55615	24.0246	-8.2245	2.53117	0.00126091	0.000959109	3.82862e-06	-0.185731	0.0570563	86.7423	-7.83841e-07	0.000187142	-0.000123359	179.67	-0.205092	0.616913
1	1.2	862	1.052	49.32	1.14818	1.74195	3.57886	23.6011	-7.93915	3.04045	0.00126293	0.000971396	3.84231e-06	-0.186464	0.0583924	87.3594	-7.83841e-07	0.000187142	-0.000123359	179.67	-0.205092	0.616913
1	1.2	863	1.056	49.68	1.20228	1.73829	3.59547	23.0722	-7.66948	3.50787	0.00126501	0.000984203	3.86248e-06	-0.187219	0.0597887	88.0016	-7.83841e-07	0.000187142	-0.000123359	179.67	-0.205092	0.616913
1	1.2	864	1.06	50.04	1.25712	1.73694	3.60744	22.467	-7.40977	3.93485	0.00126706	0.000997441	3.88697e-06	-0.187987	0.0612361	88.6646	-7.83841e-07	0.000187142	-0.000123359	179.67	-0.205092	0.616913
1	1.2	865	1.064	50.4	1.31129	1.73675	3.61622	21.8144	-7.15438	4.32272	0.00126901	0.00101102	3.91363e-06	-0.188761	0.0627254	89.3437	-7.83841e-07	0.000187142	-0.000123359	179.67	-0.205092	0.616913
1	1.2	866	1.068	50.76	1.36339	1.73655	3.62325	21.1434	-6.89765	4.6728	0.00127078	0.00102484	3.94029e-06	-0.189533	0.0642473	90.0345	-7.83841e-07	0.000187142	-0.000123359	179.67	-0.205092	0.616913
1	1.2	867	1.072	51.12	1.41205	1.7352	3.62999	20.4829	-6.63387	4.9865	0.00127229	0.00103881	3.96478e-06	-0.190296	0.0657929	90.7325	-7.83841e-07	0.000187142	-0.000123359	179.67	-0.205092	0.616913
1	1.2	868	1.076	51.48	1.45587	1.73154	3.63789	19.8619	-6.35739	5.26516	0.00127347	0.00105285	3.98496e-06	-0.191042	0.067353	91.4331	-7.83841e-07	0.000187142	-0.000123359	179.67	-0.205092	0.616913
1	1.2	869	1.08	51.84	1.49344	1.7244	3.6484	19.3094	-6.06256	5.51011	0.00127423	0.00106685	3.99864e-06	-0.191763	0.0689183	92.1319	-7.83841e-07	0.000187142	-0.000123359	179.67	-0.205092	0.616913
1	1.2	870	1.084	52.2	1.5234	1.71264	3.66296	18.8543	-5.74367	5.72275	0.00127451	0.00108074	4.00369e-06	-0.192451	0.0704799	92.8244	-7.83841e-07	0.000187142	-0.000123359	179.67	-0.205092	0.616913
1	1.2	871	1.088	52.56	1.54861	1.69565	3.68023	18.4497	-5.38993	5.91526	0.00127449	0.00109451	4.00802e-06	-0.193113	0.0720366	93.5105	-7.83841e-07	0.000187142	-0.000123359	179.67	-0.205092	0.616913
1	1.2	872	1.092	52.92	1.57283	1.67406	3.69786	18.0322	-4.9987	6.09881	0.00127444	0.00110827	4.01977e-06	-0.193758	0.0735971	94.1946	-7.83841e-07	0.000187142	-0.000123359	179.67	-0.205092	0.616913
1	1.2	873	1.096	53.28	1.59603	1.64847	3.71582	17.6057	-4.57636	6.27327	0.00127437	0.00112207	4.03708e-06	-0.194389	0.0751675	94.8794	-7.83841e-07	0.000187142	-0.000123359	179.67	-0.205092	0.616913
1	1.2	874	1.1	53.64	1.61817	1.61954	3.73407	17.1742	-4.12945	6.43846	0.00127428	0.00113594	4.05811e-06	-0.195006	0.0767535	95.5676	-7.83841e-07	0.000187142	-0.000123359	179.67	-0.205092	0.616913
1	1.2	875	1.104	54	1.63919	1.58789	3.75259	16.7417	-3.66446	6.59418	0.00127419	0.00114993	4.08099e-06	-0.195607	0.0783607	96.2616	-7.83841e-07	0.000187142	-0.000123359	179.67	-0.205092	0.616913
1	1.2	876	1.108	54.36	1.65906	1.55415	3.77134	16.3121	-3.18781	6.74032	0.0012741	0.00116409	4.10387e-06	-0.196195	0.0799953	96.9642	-7.83841e-07	0.000187142	-0.000123359	179.67	-0.205092	0.616913
1	1.2	877	1.112	54.72	1.67774	1.51896	3.79029	15.8895	-2.706	6.87668	0.00127401	0.00117847	4.12489e-06	-0.196769	0.0816628	97.6779	-7.83841e-07	0.000187142	-0.000123359	179.67	-0.205092	0.616913
1	1.2	878	1.116	55.08	1.69516	1.48296	3.8094	15.4778	-2.22556	7.00308	0.00127394	0.0011931	4.14221e-06	-0.19733	0.083369	98.4052	-7.83841e-07	0.000187142	-0.000123359	179.67	-0.205092	0.616913
1	1.2	879	1.12	55.44	1.71131	1.44676	3.82865	15.081	-1.75287	7.11937	0.00127389	0.00120804	4.15396e-06	-0.197878	0.0851199	99.1489	-7.83841e-07	0.000187142	-0.000123359	179.67	-0.205092	0.616913
1	1.2	880	1.124	55.8	1.72612	1.411	3.84799	14.703	-1.29447	7.22539	0.00127388	0.00122333	4.15829e-06	-0.198413	0.0869212	99.9115	-7.83841e-07	0.000187142	-0.000123359	179.67	-0.205092	0.616913
1	1.2	881	1.128	56.16	1.73956	1.37633	3.8674	14.348	-0.856854	7.32095	0.0012734	0.00123917	4.16244e-06	-0.198929	0.0888018	100.703	-7.83841e-07	0.000187142	-0.000123359	179.67	-0.205092	0.616913
1	1.2	882	1.132	56.52	1.75159	1.34337	3.88684	14.0198	-0.446432	7.40591	0.00127209	0.00125564	4.17356e-06	-0.199421	0.0907724	101.528	-7.83841e-07	0.000187142	-0.000123359	179.67	-0.205092	0.616913
1	1.2	883	1.136	56.88	1.76215	1.31274	3.90628	13.7225	-0.0697199	7.48008	0.00127011	0.00127257	4.18967e-06	-0.199894	0.0928107	102.376	-7.83841e-07	0.000187142	-0.000123359	179.67	-0.205092	0.616913
1	1.2	884	1.14	57.24	1.77121	1.2851	3.92569	13.4599	0.266777	7.54329	0.00126762	0.0012898	4.20876e-06	-0.20035	0.0948942	103.24	-7.83841e-07	0.000187142	-0.000123359	179.67	-0.205092	0.616913
1	1.2	885	1.144	57.6	1.77872	1.26106	3.94504	13.2362	0.556643	7.59539	0.00126481	0.00130717	4.22885e-06	-0.200792	0.0970013	104.112	-7.83841e-07	0.000187142	-0.000123359	179.67	-0.205092	0.616913
1	1.2	886	1.148	57.96	1.78463	1.24126	3.96428	13.0552	0.793368	7.63621	0.00126184	0.00132452	4.24795e-06	-0.201225	0.0991096	104.983	-7.83841e-07	0.000187142	-0.000123359	179.67	-0.205092	0.616913
1	1.2	887	1.152	58.32	1.78891	1.22634	3.9834	12.9211	0.970461	7.66557	0.00125888	0.00134169	4.26405e-06	-0.201652	0.101197	105.845	-7.83841e-07	0.000187142	-0.000123359	179.67	-0.205092	0.616913
1	1.2	888	1.156	58.68	1.79151	1.21692	4.00235	12.8376	1.08148	7.68331	0.0012561	0.00135852	4.27517e-06	-0.202075	0.103241	106.69	-7.83841e-07	0.000187142	-0.000123359	179.67	-0.205092	0.616913
1	1.2	889	1.16	59.04	1.79239	1.21364	4.0211	12.8089	1.11992	7.68926	0.00125367	0.00137485	4.27933e-06	-0.202499	0.105219	107.51	-7.83841e-07	0.000187142	-0.000123359	179.67	-0.205092	0.616913
1	1.2	890	1.164	59.4	1.78755	1.21478	4.04119	12.8652	1.08543	7.6798	0.00125187	0.00138363	4.28493e-06	-0.202662	0.106306	107.955	-7.83841e-07	0.000187142	-0.000123359	179.67	-0.205092	0.616913
1	1.2	891	1.168	59.76	1.77426	1.21789	4.06359	13.0196	0.990838	7.65386	0.00125103	0.00138744	4.28545e-06	-0.202726	0.106779	108.148	-7.83841e-07	0.000187142	-0.000123359	179.67	-0.205092	0.616913
1	1.2	892	1.172	60.12	1.7544	1.22254	4.0874	13.2503	0.849502	7.61511	0.00125012	0.0013915	4.28686e-06	-0.202794	0.107286	108.355	-7.83841e-07	0.000187142	-0.000123359	179.67	-0.205092	0.616913
1	1.2	893	1.176	60.48	1.72986	1.22829	4.11175	13.5354	0.674797	7.5672	0.00124919	0.00139567	4.28895e-06	-0.202864	0.107805	108.568	-7.83841e-07	0.000187142	-0.000123359	179.67	-0.205092	0.616913
1	1.2	894	1.18	60.84	1.7025	1.2347	4.13573	13.8532	0.480044	7.5138	0.00124827	0.00139979	4.29147e-06	-0.202932	0.108319	108.777	-7.83841e-07	0.000187142	-0.000123359	179.67	-0.205092	0.616913
1	1.2	895	1.184	61.2	1.6742	1.24133	4.15846	14.1819	0.278613	7.45857	0.00124739	0.00140371	4.29423e-06	-0.202996	0.108806	108.977	-7.83841e-07	0.000187142	-0.000123359	179.67	-0.205092	0.616913
1	1.2	896	1.188	61.56	1.64684	1.24774	4.17905	14.4997	0.0838767	7.40517	0.00124659	0.00140726	4.29698e-06	-0.203054	0.109249	109.157	-7.83841e-07	0.000187142	-0.000123359	179.67	-0.205092	0.616913
1	1.2	897	1.192	61.92	1.6223	1.25349	4.19661	14.7849	-0.0908459	7.35726	0.0012459	0.00141029	4.29951e-06	-0.203104	0.109627	109.312	-7.83841e-07	0.000187142	-0.000123359	179.67	-0.205092	0.616913
1	1.2	898	1.196	62.28	1.60244	1.25815	4.21026	15.0155	-0.232181	7.3185	0.00124537	0.00141265	4.30159e-06	-0.203142	0.109921	109.432	-7.83841e-07	0.000187142	-0.000123359	179.67	-0.205092	0.616913
1	1.2	899	1.2	62.64	1.58915	1.26126	4.2191	15.1699	-0.326767	7.29257	0.00124502	0.00141418	4.303e-06	-0.203167	0.110112	109.51	-7.83841e-07	0.000187142	-0.000123359	179.67	-0.205092	0.616913
1	1.2	900	1.204	63	1.58431	1.26239	4.22224	15.2262	-0.361268	7.28311	0.0012449	0.00141472	4.30352e-06	-0.203176	0.11018	109.537	-7.83841e-07	0.000187142	-0.000123359	179.67	-0.205092	0.616913
1	2.1	53	0.176	70.525	-0.807969	0.76647	3.09297	32.8732	-19.5885	9.33776	-0.00658891	0.00189644	-2.91994e-05	-0.0492703	0.235828	43.8274	2.38896e-06	-0.000346026	0.000122752	150.475	-0.422887	0.583844
1	2.1	54	0.18	71.18	-0.799813	0.870512	3.07426	28.8085	-19.4594	8.84378	-0.00615117	0.0019183	-2.79224e-05	-0.0509121	0.220539	41.1629	2.39044e-06	-0.000346655	0.000121818	150.815	-0.421477	0.585547
1	2.1	55	0.184	71.835	-0.796392	0.920917	3.06642	27.2037	-19.2466	8.02937	-0.00579659	0.00192142	-2.69346e-05	-0.0518148	0.208181	38.9715	2.39106e-06	-0.000347401	0.000120671	151.228	-0.41973	0.587587
1	2.1	56	0.188	72.49	-0.831039	0.930002	3.09552	27.4022	-18.6903	6.74432	-0.00555119	0.00192111	-2.62353e-05	-0.0524656	0.199649	37.42	2.39241e-06	-0.000348294	0.000119288	151.725	-0.417619	0.590035
1	2.1	57	0.192	73.145	-0.913659	0.935513	3.16492	27.8757	-17.7048	5.0123	-0.00540581	0.00192015	-2.56897e-05	-0.0528472	0.194563	36.508	2.39564e-06	-0.000349353	0.000117653	152.313	-0.415125	0.592936
1	2.1	58	0.196	73.8	-1.01227	0.938343	3.24776	28.4409	-16.5305	3.01405	-0.0053214	0.00191851	-2.52987e-05	-0.0530387	0.191577	35.9853	2.3995e-06	-0.000350533	0.0001158	152.975	-0.412287	0.596184
1	2.1	59	0.2	74.455	-1.09489	0.939386	3.31716	28.9144	-15.4075	0.930364	-0.00525891	0.00191612	-2.50633e-05	-0.0531192	0.189349	35.6016	2.40273e-06	-0.000351785	0.000113764	153.697	-0.409146	0.599671
1	2.1	60	0.204	75.11	-1.12954	0.939535	3.34626	29.113	-14.5761	-1.05805	-0.0051793	0.00191295	-2.49847e-05	-0.0531678	0.186536	35.1066	2.40408e-06	-0.000353065	0.000111581	154.461	-0.405742	0.603291
1	2.1	61	0.208	75.765	-1.12314	0.929515	3.3242	28.013	-14.1589	-2.87906	-0.00507349	0.00190908	-2.48443e-05	-0.0532159	0.182816	34.4432	2.40531e-06	-0.0003544	0.000109222	155.279	-0.40204	0.607112
1	2.1	62	0.212	76.42	-1.10788	0.905623	3.27159	25.39	-13.9957	-4.65318	-0.00496751	0.00190454	-2.45098e-05	-0.053245	0.179085	33.7783	2.40823e-06	-0.00035582	0.000106667	156.161	-0.398012	0.611203
1	2.1	63	0.216	77.075	-1.08967	0.877106	3.20881	22.2593	-13.9027	-6.48856	-0.00487498	0.0018992	-2.41104e-05	-0.05326	0.175824	33.1974	2.41171e-06	-0.000357285	0.000103953	157.091	-0.393711	0.615465
1	2.1	64	0.22	77.73	-1.07441	0.853214	3.1562	19.6363	-13.696	-8.49336	-0.00480949	0.00189295	-2.37758e-05	-0.0532655	0.173515	32.7862	2.41464e-06	-0.000358752	0.000101122	158.054	-0.389191	0.619796
1	2.1	65	0.224	78.385	-1.06801	0.843195	3.13414	18.5363	-13.1917	-10.7757	-0.00478463	0.00188566	-2.36355e-05	-0.0532663	0.172638	32.6301	2.41586e-06	-0.000360179	9.82146e-05	159.032	-0.384504	0.624094
1	2.1	66	0.228	79.04	-1.09896	0.877308	3.1532	18.668	-12.1589	-13.5934	-0.00495643	0.00187857	-2.41575e-05	-0.0527348	0.17865	33.7069	2.41626e-06	-0.000361584	9.51972e-05	160.037	-0.379599	0.628413
1	2.1	67	0.232	79.695	-1.17287	0.960865	3.19867	18.982	-10.7204	-16.8744	-0.00538404	0.00187176	-2.54518e-05	-0.0513757	0.193612	36.3877	2.41722e-06	-0.000362997	9.20434e-05	161.08	-0.37444	0.632821
1	2.1	68	0.236	80.35	-1.26134	1.06569	3.25293	19.3568	-9.22223	-20.232	-0.00593579	0.00186338	-2.71112e-05	-0.0495418	0.212912	39.8482	2.41837e-06	-0.000364388	8.88021e-05	162.144	-0.369105	0.637237
1	2.1	69	0.24	81.005	-1.33596	1.16361	3.29839	19.6708	-8.01063	-23.2794	-0.00648003	0.00185157	-2.87284e-05	-0.0475859	0.231938	43.2639	2.41933e-06	-0.00036573	8.55222e-05	163.213	-0.36367	0.641581
1	2.1	70	0.244	81.66	-1.36832	1.22646	3.31746	19.8025	-7.43179	-25.63	-0.00688507	0.00183448	-2.98959e-05	-0.045861	0.246077	45.8105	2.41973e-06	-0.000366993	8.22527e-05	164.272	-0.35821	0.64577
1	2.1	71	0.248	82.315	-1.36992	1.2592	3.31207	19.7616	-7.31217	-27.3646	-0.00712126	0.00181513	-3.06006e-05	-0.0445522	0.254298	47.2977	2.41906e-06	-0.000368184	7.89566e-05	165.331	-0.352661	0.64984
1	2.1	72	0.252	82.97	-1.37119	1.28612	3.297	19.6481	-7.23961	-28.8593	-0.00727639	0.00179476	-3.11139e-05	-0.0434242	0.259678	48.275	2.41746e-06	-0.000369324	7.56011e-05	166.4	-0.346972	0.653845
1	2.1	73	0.256	83.625	-1.37219	1.30796	3.27394	19.4756	-7.20236	-30.1698	-0.00739493	0.00176884	-3.14558e-05	-0.0421994	0.263761	49.0279	2.41555e-06	-0.0003704	7.2242e-05	167.464	-0.34124	0.657732
1	2.1	74	0.26	84.28	-1.37294	1.32548	3.24456	19.2578	-7.18863	-31.3519	-0.00752137	0.00173283	-3.16464e-05	-0.0406001	0.268093	49.842	2.41395e-06	-0.000371402	6.89348e-05	168.507	-0.335565	0.661452
1	2.1	75	0.264	84.935	-1.37347	1.33942	3.21053	19.0087	-7.18667	-32.4615	-0.0077002	0.00168219	-3.17054e-05	-0.0383485	0.274222	51.0028	2.41328e-06	-0.000372321	6.57353e-05	169.512	-0.330047	0.664954
1	2.1	76	0.268	85.59	-1.37383	1.35054	3.17353	18.7417	-7.18471	-33.5543	-0.00794145	0.001616	-3.19353e-05	-0.0353851	0.282496	52.5694	2.41182e-06	-0.000373151	6.26047e-05	170.491	-0.32461	0.668253
1	2.1	77	0.272	86.245	-1.37405	1.3596	3.13522	18.4708	-7.17098	-34.6862	-0.00821545	0.00153726	-3.24835e-05	-0.0318949	0.291883	54.3515	2.40835e-06	-0.000373901	5.9506e-05	171.453	-0.319188	0.671382
1	2.1	78	0.276	86.9	-1.37416	1.36734	3.09728	18.2096	-7.13372	-35.913	-0.00850718	0.00144739	-3.31378e-05	-0.0279674	0.301862	56.2603	2.4042e-06	-0.000374576	5.6497e-05	172.383	-0.313894	0.674319
1	2.1	79	0.28	87.555	-1.3742	1.37452	3.06139	17.9718	-7.06117	-37.2905	-0.00880159	0.0013478	-3.3686e-05	-0.0236923	0.311909	58.2073	2.40072e-06	-0.00037518	5.36359e-05	173.265	-0.308839	0.677042
1	2.1	80	0.284	88.21	-1.37421	1.38188	3.02922	17.7711	-6.94155	-38.8745	-0.00908365	0.00123991	-3.39158e-05	-0.0191592	0.321501	60.1038	2.39926e-06	-0.00037572	5.09806e-05	174.083	-0.304136	0.679528
1	2.1	81	0.288	88.865	-1.35607	1.38711	2.99679	17.633	-6.59436	-40.916	-0.00935501	0.00112284	-3.40145e-05	-0.0143332	0.330693	61.9577	2.39775e-06	-0.000376221	4.84931e-05	174.847	-0.299708	0.681785
1	2.1	82	0.292	89.52	-1.31071	1.38883	2.96133	17.5446	-5.94705	-43.4459	-0.00962567	0.000995649	-3.42496e-05	-0.00915467	0.339834	63.828	2.39413e-06	-0.00037668	4.61349e-05	175.569	-0.295482	0.683825
1	2.1	83	0.296	90.175	-1.25172	1.38922	2.92626	17.4621	-5.14984	-46.1892	-0.00989319	0.000859646	-3.45303e-05	-0.00367577	0.348841	65.703	2.38981e-06	-0.000377058	4.39627e-05	176.232	-0.291571	0.685641
1	2.1	84	0.3	90.83	-1.1927	1.39046	2.89505	17.342	-4.35292	-48.8715	-0.0101551	0.000716131	-3.47654e-05	0.00205134	0.357633	67.571	2.3862e-06	-0.000377314	4.20333e-05	176.819	-0.288088	0.687225
1	2.1	85	0.304	91.485	-1.14724	1.39474	2.87113	17.1406	-3.70651	-51.2178	-0.0104091	0.000566411	-3.4864e-05	0.00797441	0.366127	69.42	2.38468e-06	-0.000377408	4.04035e-05	177.316	-0.285147	0.688567
1	2.1	86	0.308	92.14	-1.11348	1.40435	2.85546	16.7751	-3.2339	-53.4401	-0.0106631	0.000401395	-3.4825e-05	0.0144336	0.374585	71.3226	2.384e-06	-0.000377458	3.90488e-05	177.729	-0.2827	0.689674
1	2.1	87	0.312	92.795	-1.08235	1.41786	2.84572	16.2747	-2.83495	-55.7213	-0.0109189	0.000220212	-3.47321e-05	0.0214638	0.383061	73.2867	2.38238e-06	-0.000377578	3.79314e-05	178.069	-0.280671	0.690552
1	2.1	88	0.316	93.45	-1.05666	1.43179	2.84051	15.7634	-2.47472	-57.7439	-0.0111642	3.6498e-05	-3.46211e-05	0.0285547	0.391163	75.2035	2.38044e-06	-0.000377722	3.70879e-05	178.325	-0.279132	0.69119
1	2.1	89	0.32	94.105	-1.03919	1.44269	2.83842	15.3656	-2.11827	-59.1904	-0.0113868	-0.000136109	-3.45282e-05	0.0351959	0.3985	76.9643	2.37882e-06	-0.000377842	3.6555e-05	178.486	-0.278156	0.691581
1	2.1	90	0.324	94.76	-1.03275	1.44709	2.83803	15.2054	-1.73067	-59.7431	-0.0115746	-0.000283976	-3.44892e-05	0.0408773	0.404681	78.4604	2.37814e-06	-0.000377892	3.63692e-05	178.543	-0.277815	0.691713
1	2.1	91	0.328	95.415	-1.06338	1.42907	2.87127	15.5166	-1.23925	-59.735	-0.0117172	-0.000400896	-3.44255e-05	0.045354	0.409364	79.6173	2.37815e-06	-0.000377892	3.63712e-05	178.542	-0.277819	0.691711
1	2.1	92	0.332	96.07	-1.13948	1.38611	2.95151	16.2931	-0.667304	-59.6779	-0.0118229	-0.00049596	-3.42735e-05	0.0489664	0.412812	80.5076	2.37816e-06	-0.000377891	3.6376e-05	178.541	-0.277828	0.691708
1	2.1	93	0.336	96.725	-1.23739	1.33483	3.04959	17.299	-0.123825	-59.5228	-0.0119069	-0.000578475	-3.40921e-05	0.0520814	0.415534	81.2429	2.37817e-06	-0.000377891	3.63818e-05	178.54	-0.277838	0.691703
1	2.1	94	0.34	97.38	-1.33342	1.29186	3.13631	18.2984	0.282191	-59.2209	-0.0119845	-0.000657751	-3.39401e-05	0.0550659	0.418043	81.9347	2.37817e-06	-0.00037789	3.63866e-05	178.538	-0.277847	0.6917
1	2.1	95	0.344	98.035	-1.40391	1.27384	3.18251	19.0555	0.441749	-58.7232	-0.0120712	-0.000743094	-3.38764e-05	0.058287	0.42085	82.6949	2.37818e-06	-0.00037789	3.63887e-05	178.537	-0.277851	0.691698
1	2.1	96	0.348	98.69	-1.44719	1.31371	3.19357	19.4911	0.436085	-57.8933	-0.0121838	-0.000856583	-3.37261e-05	0.0625634	0.424491	83.6959	2.37819e-06	-0.000377889	3.63973e-05	178.534	-0.277866	0.691691
1	2.1	97	0.352	99.345	-1.47903	1.41044	3.19733	19.7624	0.396437	-56.7276	-0.0122483	-0.000924332	-3.35759e-05	0.0651089	0.426569	84.2811	2.37821e-06	-0.000377888	3.6406e-05	178.531	-0.277882	0.691685
1	2.1	98	0.356	0	-1.50194	1.52973	3.19827	19.9882	0.28882	-55.3758	-0.01224	-0.000913717	-3.36277e-05	0.0647149	0.426307	84.1976	2.37822e-06	-0.000377887	3.64148e-05	178.528	-0.277893	0.691678
1	2.1	99	0.36	0.655	-1.51843	1.6373	3.20084	20.2872	0.0792519	-53.9878	-0.0122063	-0.000876777	-3.37239e-05	0.0633307	0.425224	83.8849	2.37825e-06	-0.000377885	3.64312e-05	178.525	-0.277917	0.691666
1	2.1	100	0.364	1.31	-1.531	1.69884	3.2095	20.778	-0.266252	-52.7133	-0.0121336	-0.000805869	-3.37758e-05	0.0606528	0.42287	83.2492	2.37826e-06	-0.000377884	3.644e-05	178.521	-0.277944	0.691659
1	2.1	101	0.368	1.965	-1.54087	1.72257	3.2229	21.4695	-0.769919	-51.5608	-0.012017	-0.000697156	-3.38588e-05	0.056533	0.419075	82.2507	2.37828e-06	-0.000377883	3.64476e-05	178.517	-0.277969	0.691653
1	2.1	102	0.372	2.62	-1.54797	1.74028	3.23677	22.2685	-1.4027	-50.4326	-0.0118732	-0.000564058	-3.40569e-05	0.0514865	0.414394	81.0239	2.37831e-06	-0.000377882	3.64656e-05	178.513	-0.277995	0.69164
1	2.1	103	0.376	3.275	-1.5529	1.75299	3.25124	23.1411	-2.12171	-49.3198	-0.0117221	-0.00042481	-3.42933e-05	0.0462047	0.409471	79.7369	2.37834e-06	-0.000377879	3.64871e-05	178.508	-0.278021	0.691623
1	2.1	104	0.38	3.93	-1.55623	1.76174	3.26645	24.0532	-2.88405	-48.2134	-0.0115832	-0.000297649	-3.44913e-05	0.0413792	0.404945	78.5577	2.37837e-06	-0.000377877	3.65051e-05	178.504	-0.278049	0.69161
1	2.1	105	0.384	4.585	-1.55856	1.76758	3.28253	24.9708	-3.6468	-47.1044	-0.0114763	-0.000200816	-3.45744e-05	0.0377016	0.40146	77.6545	2.37839e-06	-0.000377876	3.65127e-05	178.499	-0.278077	0.691604
1	2.1	106	0.388	5.24	-1.56047	1.77152	3.29961	25.8598	-4.36707	-45.9839	-0.011403	-0.000136747	-3.45881e-05	0.0352615	0.399064	77.0447	2.3784e-06	-0.000377875	3.65213e-05	178.494	-0.278106	0.691597
1	2.1	107	0.392	5.895	-1.56254	1.77462	3.31782	26.6864	-5.00197	-44.8429	-0.0113502	-9.32853e-05	-3.46207e-05	0.0335979	0.397331	76.6165	2.37843e-06	-0.000377873	3.6542e-05	178.489	-0.278136	0.691581
1	2.1	108	0.396	6.55	-1.56536	1.7779	3.33731	27.4164	-5.50858	-43.6724	-0.0113154	-6.67717e-05	-3.46596e-05	0.0325763	0.396184	76.3433	2.37848e-06	-0.00037787	3.65666e-05	178.484	-0.278167	0.691563
1	2.1	109	0.4	7.205	-1.56952	1.7824	3.35819	28.0159	-5.844	-42.4634	-0.0112963	-5.35468e-05	-3.46922e-05	0.032062	0.395551	76.1988	2.37851e-06	-0.000377868	3.65873e-05	178.479	-0.278198	0.691547
1	2.1	110	0.404	7.86	-1.5756	1.78915	3.38061	28.4507	-5.96535	-41.207	-0.0112905	-4.99515e-05	-3.47059e-05	0.0319205	0.395356	76.1565	2.37853e-06	-0.000377867	3.65959e-05	178.474	-0.278228	0.69154
1	2.1	111	0.408	8.515	-1.58687	1.79786	3.41393	28.7098	-5.656	-39.8128	-0.0112958	-5.42017e-05	-3.47025e-05	0.0320836	0.395532	76.1992	2.37854e-06	-0.000377866	3.66046e-05	178.469	-0.278259	0.691534
1	2.1	112	0.412	9.17	-1.6033	1.80673	3.45978	28.8412	-4.91834	-38.2546	-0.0113086	-6.43368e-05	-3.46944e-05	0.0324727	0.39595	76.301	2.37857e-06	-0.000377864	3.66252e-05	178.464	-0.27829	0.691518
1	2.1	113	0.416	9.825	-1.62049	1.81456	3.50672	28.9	-4.03789	-36.6193	-0.0113238	-7.64336e-05	-3.46848e-05	0.032937	0.39645	76.4225	2.37862e-06	-0.000377861	3.66498e-05	178.458	-0.278321	0.691499
1	2.1	114	0.42	10.48	-1.63402	1.82015	3.54327	28.9411	-3.30023	-34.9942	-0.0113365	-8.65687e-05	-3.46767e-05	0.033326	0.396869	76.5244	2.37865e-06	-0.000377859	3.66705e-05	178.453	-0.278351	0.691484
1	2.1	115	0.424	11.135	-1.63951	1.82227	3.558	29.0195	-2.99089	-33.4662	-0.0113418	-9.08189e-05	-3.46733e-05	0.0334891	0.397044	76.5671	2.37867e-06	-0.000377858	3.66792e-05	178.449	-0.27838	0.691477
1	2.1	116	0.428	11.79	-1.63415	1.82223	3.53539	29.1275	-3.47475	-32.0185	-0.0112974	-5.726e-05	-3.4693e-05	0.0321949	0.395578	76.2185	2.37868e-06	-0.000377857	3.66867e-05	178.444	-0.278412	0.691471
1	2.1	117	0.432	12.445	-1.62131	1.82196	3.47885	29.2285	-4.64813	-30.5931	-0.0111915	2.27638e-05	-3.47398e-05	0.0291086	0.392081	75.3873	2.37871e-06	-0.000377855	3.67047e-05	178.439	-0.278447	0.691457
1	2.1	118	0.436	13.1	-1.60586	1.8212	3.40534	29.334	-6.09376	-29.2152	-0.011065	0.000118276	-3.47957e-05	0.025425	0.387907	74.3953	2.37874e-06	-0.000377853	3.67262e-05	178.435	-0.278479	0.691441
1	2.1	119	0.44	13.755	-1.59267	1.81973	3.33181	29.4555	-7.39437	-27.91	-0.0109591	0.0001983	-3.48426e-05	0.0223387	0.38441	73.5641	2.37877e-06	-0.000377851	3.67442e-05	178.43	-0.278503	0.691427
1	2.1	120	0.444	14.41	-1.58661	1.81731	3.2752	29.6045	-8.13266	-26.7027	-0.0109146	0.000231859	-3.48622e-05	0.0210445	0.382943	73.2155	2.37879e-06	-0.00037785	3.67518e-05	178.426	-0.278512	0.691422
1	2.1	121	0.448	15.065	-1.58591	1.80783	3.23523	29.7955	-8.37342	-25.6318	-0.0109269	0.000222968	-3.48586e-05	0.0213888	0.383351	73.3106	2.3788e-06	-0.000377849	3.67571e-05	178.423	-0.278522	0.691418
1	2.1	122	0.452	15.72	-1.58548	1.78781	3.20061	30.021	-8.49451	-24.6806	-0.0109563	0.000201768	-3.48502e-05	0.0222099	0.384322	73.5372	2.37882e-06	-0.000377848	3.67698e-05	178.419	-0.278545	0.691408
1	2.1	123	0.456	16.375	-1.58526	1.76095	3.17175	30.2591	-8.54822	-23.7912	-0.0109913	0.000176465	-3.48401e-05	0.0231898	0.385481	73.8076	2.37884e-06	-0.000377846	3.6785e-05	178.416	-0.278573	0.691396
1	2.1	124	0.46	17.03	-1.58518	1.73094	3.14909	30.4878	-8.58685	-22.9056	-0.0110207	0.000155265	-3.48316e-05	0.0240108	0.386452	74.0342	2.37886e-06	-0.000377845	3.67978e-05	178.413	-0.278596	0.691386
1	2.1	125	0.464	17.685	-1.58517	1.70148	3.13308	30.6853	-8.66273	-21.966	-0.011033	0.000146374	-3.48281e-05	0.0243551	0.386859	74.1293	2.37887e-06	-0.000377844	3.68031e-05	178.411	-0.278606	0.691382
1	2.1	126	0.468	18.34	-1.59091	1.67197	3.12286	30.8298	-8.79564	-20.9586	-0.0110271	0.000150634	-3.483e-05	0.0241903	0.386666	74.084	2.37888e-06	-0.000377844	3.68051e-05	178.409	-0.27861	0.691381
1	2.1	127	0.472	18.995	-1.60459	1.63996	3.11667	30.9359	-8.95072	-19.9222	-0.0110132	0.000160791	-3.48344e-05	0.0237972	0.386205	73.976	2.37888e-06	-0.000377843	3.681e-05	178.407	-0.278618	0.691377
1	2.1	128	0.476	19.65	-1.62092	1.60633	3.11349	31.0363	-9.09827	-18.8771	-0.0109965	0.000172915	-3.48397e-05	0.0233281	0.385655	73.8472	2.37889e-06	-0.000377843	3.68157e-05	178.406	-0.278629	0.691373
1	2.1	129	0.48	20.305	-1.6346	1.57197	3.11231	31.1636	-9.20857	-17.8438	-0.0109826	0.000183073	-3.48441e-05	0.0229351	0.385194	73.7393	2.3789e-06	-0.000377842	3.68206e-05	178.405	-0.278638	0.691369
1	2.1	130	0.484	20.96	-1.64033	1.53778	3.11215	31.3504	-9.25194	-16.8427	-0.0109768	0.000187333	-3.4846e-05	0.0227702	0.385	73.694	2.37891e-06	-0.000377842	3.68226e-05	178.405	-0.278641	0.691367
1	2.1	131	0.488	21.615	-1.63991	1.50274	3.11741	31.6002	-9.11733	-15.8793	-0.0110248	0.000150238	-3.48208e-05	0.0241979	0.386583	74.0738	2.37891e-06	-0.000377842	3.68226e-05	178.405	-0.278641	0.691367
1	2.1	132	0.492	22.27	-1.63697	1.46625	3.13213	31.8911	-8.79635	-14.9402	-0.0111392	6.17816e-05	-3.47609e-05	0.0276023	0.390356	74.9795	2.37891e-06	-0.000377842	3.68226e-05	178.405	-0.278641	0.691367
1	2.1	133	0.496	22.925	-1.62899	1.42985	3.15466	32.2182	-8.41324	-14.0169	-0.0112759	-4.37948e-05	-3.46894e-05	0.0316657	0.39486	76.0604	2.37891e-06	-0.000377842	3.68226e-05	178.405	-0.278641	0.691367
1	2.1	134	0.5	23.58	-1.61343	1.39505	3.18338	32.5763	-8.09225	-13.1007	-0.0113903	-0.000132252	-3.46295e-05	0.0350702	0.398633	76.9661	2.37891e-06	-0.000377842	3.68226e-05	178.405	-0.278641	0.691367
1	2.1	135	0.504	24.235	-1.58779	1.3634	3.21666	32.9605	-7.95764	-12.1833	-0.0114383	-0.000169346	-3.46043e-05	0.0364978	0.400215	77.3459	2.37891e-06	-0.000377842	3.68226e-05	178.405	-0.278641	0.691367
1	2.1	136	0.508	24.89	-1.54015	1.33716	3.2646	33.4107	-7.98002	-11.2622	-0.0114348	-0.000166026	-3.46134e-05	0.0363722	0.400102	77.3159	2.37891e-06	-0.000377842	3.68226e-05	178.405	-0.278641	0.691367
1	2.1	137	0.512	25.545	-1.46767	1.3153	3.32831	33.9304	-8.04921	-10.343	-0.0114229	-0.000155354	-3.4635e-05	0.0359663	0.399711	77.2157	2.37891e-06	-0.000377842	3.68226e-05	178.405	-0.278641	0.691367
1	2.1	138	0.516	26.2	-1.38145	1.29443	3.3926	34.4595	-8.16826	-9.4295	-0.0114002	-0.000136262	-3.46607e-05	0.035237	0.398968	77.0303	2.37891e-06	-0.000377842	3.68226e-05	178.405	-0.278641	0.691367
1	2.1	139	0.52	26.855	-1.29258	1.27115	3.4423	34.9379	-8.34025	-8.52515	-0.0113646	-0.00010768	-3.46823e-05	0.0341407	0.397798	76.7447	2.37891e-06	-0.000377842	3.68226e-05	178.405	-0.278641	0.691367
1	2.1	140	0.524	27.51	-1.21214	1.24205	3.46224	35.3055	-8.56826	-7.63356	-0.0113139	-6.85394e-05	-3.46914e-05	0.0326342	0.396127	76.3437	2.37891e-06	-0.000377842	3.68226e-05	178.405	-0.278641	0.691367
1	2.1	141	0.528	28.165	-1.13821	1.20593	3.45862	35.5405	-8.8868	-6.73388	-0.0112317	-6.5337e-06	-3.47105e-05	0.0302425	0.393413	75.699	2.37891e-06	-0.000377842	3.68226e-05	178.405	-0.278641	0.691367
1	2.1	142	0.532	28.82	-1.06337	1.16506	3.44887	35.6828	-9.29386	-5.82369	-0.0111195	7.7625e-05	-3.47562e-05	0.0269945	0.389706	74.8206	2.37891e-06	-0.000377842	3.68226e-05	178.405	-0.278641	0.691367
1	2.1	143	0.536	29.475	-0.990549	1.12124	3.43469	35.7654	-9.7376	-4.93431	-0.0110018	0.000165477	-3.48107e-05	0.0236026	0.385818	73.9012	2.37891e-06	-0.000377842	3.68226e-05	178.405	-0.278641	0.691367
1	2.1	144	0.54	30.13	-0.922665	1.07631	3.41777	35.8211	-10.1662	-4.09709	-0.0109032	0.000238559	-3.48563e-05	0.0207793	0.382562	73.1332	2.37891e-06	-0.000377842	3.68226e-05	178.405	-0.278641	0.691367
1	2.1	145	0.544	30.785	-0.86263	1.03207	3.39981	35.8826	-10.5279	-3.34334	-0.0108485	0.000278411	-3.48755e-05	0.019237	0.380751	72.7092	2.37891e-06	-0.000377842	3.68226e-05	178.405	-0.278641	0.691367
1	2.1	146	0.548	31.44	-0.810883	0.986407	3.37791	35.9337	-10.8465	-2.67551	-0.0108285	0.000292307	-3.48761e-05	0.0186967	0.380086	72.5566	2.37891e-06	-0.000377842	3.68226e-05	178.405	-0.278641	0.691367
1	2.1	147	0.552	32.095	-0.765482	0.938105	3.35096	35.9525	-11.1565	-2.07274	-0.0108163	0.000300735	-3.48776e-05	0.018369	0.379682	72.464	2.37891e-06	-0.000377842	3.68226e-05	178.405	-0.278641	0.691367
1	2.1	148	0.556	32.75	-0.725767	0.890352	3.32328	35.9634	-11.4222	-1.53132	-0.01081	0.000305063	-3.48795e-05	0.0182007	0.379475	72.4164	2.37891e-06	-0.000377842	3.68226e-05	178.405	-0.278641	0.691367
1	2.1	149	0.56	33.405	-0.691081	0.846336	3.2992	35.9909	-11.6079	-1.04756	-0.0108077	0.000306657	-3.4881e-05	0.0181387	0.379399	72.3989	2.37891e-06	-0.000377842	3.68226e-05	178.405	-0.278641	0.691367
1	2.1	150	0.564	34.06	-0.660767	0.809245	3.28304	36.0594	-11.6777	-0.617777	-0.0108074	0.000306885	-3.48817e-05	0.0181299	0.379388	72.3964	2.37891e-06	-0.000377842	3.68226e-05	178.405	-0.278641	0.691367
1	2.1	151	0.568	34.715	-0.636659	0.779362	3.2743	36.1891	-11.6229	-0.251546	-0.0108338	0.000289153	-3.48691e-05	0.0188214	0.380263	72.5946	2.37891e-06	-0.000377842	3.68226e-05	178.405	-0.278641	0.691367
1	2.1	152	0.572	35.37	-0.619197	0.754561	3.269	36.3636	-11.4721	0.0486765	-0.0109018	0.000242478	-3.4839e-05	0.0206382	0.382522	73.1103	2.37891e-06	-0.000377842	3.68226e-05	178.405	-0.278641	0.691367
1	2.1	153	0.576	36.025	-0.605627	0.734419	3.26627	36.5527	-11.246	0.29725	-0.0109952	0.000176641	-3.48031e-05	0.023194	0.385617	73.8249	2.37891e-06	-0.000377842	3.68226e-05	178.405	-0.278641	0.691367
1	2.1	154	0.58	36.68	-0.593195	0.718509	3.26527	36.7263	-10.9651	0.508546	-0.0110975	0.000101424	-3.47731e-05	0.0261021	0.389	74.62	2.37891e-06	-0.000377842	3.68226e-05	178.405	-0.278641	0.691367
1	2.1	155	0.584	37.335	-0.579149	0.706406	3.26512	36.8542	-10.6501	0.696931	-0.0111923	2.66067e-05	-3.47605e-05	0.0289763	0.392121	75.3771	2.37891e-06	-0.000377842	3.68226e-05	178.405	-0.278641	0.691367
1	2.1	156	0.588	37.99	-0.563767	0.696566	3.266	36.9487	-10.3116	0.873384	-0.0112795	-4.65185e-05	-3.47348e-05	0.0317708	0.39498	76.0902	2.37891e-06	-0.000377842	3.68226e-05	178.405	-0.278641	0.691367
1	2.1	157	0.592	38.645	-0.549005	0.687733	3.26839	37.0412	-9.95016	1.03984	-0.0113693	-0.000122736	-3.46652e-05	0.0346807	0.397922	76.8281	2.37891e-06	-0.000377842	3.68226e-05	178.405	-0.278641	0.691367
1	2.1	158	0.596	39.3	-0.534619	0.679914	3.2719	37.1298	-9.57036	1.19711	-0.011461	-0.000201378	-3.45625e-05	0.0376804	0.400924	77.5846	2.37891e-06	-0.000377842	3.68226e-05	178.405	-0.278641	0.691367
1	2.1	159	0.6	39.955	-0.52037	0.673115	3.27616	37.2125	-9.17701	1.34599	-0.0115538	-0.000281772	-3.44379e-05	0.0407446	0.40396	78.3535	2.37891e-06	-0.000377842	3.68226e-05	178.405	-0.278641	0.691367
1	2.1	160	0.604	40.61	-0.506015	0.667343	3.2808	37.2876	-8.77484	1.48728	-0.011647	-0.000363249	-3.43023e-05	0.0438476	0.407005	79.1284	2.37891e-06	-0.000377842	3.68226e-05	178.405	-0.278641	0.691367
1	2.1	161	0.608	41.265	-0.491312	0.662605	3.28545	37.3533	-8.36862	1.62179	-0.0117397	-0.000445142	-3.41667e-05	0.0469642	0.410036	79.9032	2.37891e-06	-0.000377842	3.68226e-05	178.405	-0.278641	0.691367
1	2.1	162	0.612	41.92	-0.47602	0.658909	3.28971	37.4075	-7.96308	1.7503	-0.0118313	-0.000526777	-3.40421e-05	0.0500686	0.413026	80.6715	2.37891e-06	-0.000377842	3.68226e-05	178.405	-0.278641	0.691367
1	2.1	163	0.616	42.575	-0.459897	0.65626	3.29322	37.4486	-7.56299	1.87364	-0.011921	-0.000607487	-3.39395e-05	0.0531355	0.415952	81.4271	2.37891e-06	-0.000377842	3.68226e-05	178.405	-0.278641	0.691367
1	2.1	164	0.62	43.23	-0.442703	0.654665	3.29561	37.4746	-7.17309	1.9926	-0.012008	-0.000686603	-3.38698e-05	0.0561393	0.418788	82.1638	2.37891e-06	-0.000377842	3.68226e-05	178.405	-0.278641	0.691367
1	2.1	165	0.624	43.885	-0.424194	0.654132	3.29648	37.4837	-6.79813	2.10797	-0.0120916	-0.000763453	-3.38442e-05	0.0590546	0.42151	82.8753	2.37891e-06	-0.000377842	3.68226e-05	178.405	-0.278641	0.691367
1	2.1	166	0.628	44.54	-0.405506	0.654155	3.29644	37.4039	-6.42045	2.22444	-0.0121673	-0.000835983	-3.37819e-05	0.0617977	0.423969	83.5324	2.37891e-06	-0.000377842	3.68226e-05	178.405	-0.278641	0.691367
1	2.1	167	0.632	45.195	-0.387518	0.654312	3.29615	37.1873	-6.02528	2.34377	-0.0122339	-0.000904144	-3.36335e-05	0.0643631	0.426117	84.1287	2.37891e-06	-0.000377842	3.68226e-05	178.405	-0.278641	0.691367
1	2.1	168	0.636	45.85	-0.36961	0.654739	3.29536	36.8681	-5.62179	2.46239	-0.012295	-0.000970275	-3.34563e-05	0.0668431	0.428082	84.6918	2.37891e-06	-0.000377842	3.68226e-05	178.405	-0.278641	0.691367
1	2.1	169	0.64	46.505	-0.351158	0.65557	3.29382	36.4805	-5.21911	2.57676	-0.0123545	-0.00103672	-3.33079e-05	0.0693295	0.429989	85.2493	2.37891e-06	-0.000377842	3.68226e-05	178.405	-0.278641	0.691367
1	2.1	170	0.644	47.16	-0.331542	0.656941	3.29128	36.0587	-4.82637	2.6833	-0.0124162	-0.00110581	-3.32456e-05	0.0719147	0.431964	85.8286	2.37891e-06	-0.000377842	3.68226e-05	178.405	-0.278641	0.691367
1	2.1	171	0.648	47.815	-0.310139	0.658985	3.2875	35.6369	-4.45274	2.77845	-0.0124806	-0.0011776	-3.31672e-05	0.0746013	0.434028	86.4322	2.37891e-06	-0.000377842	3.68226e-05	178.405	-0.278641	0.691367
1	2.1	172	0.652	48.47	-0.286329	0.661839	3.28221	35.2493	-4.10735	2.85865	-0.0125452	-0.00125051	-3.298e-05	0.0773279	0.436096	87.0415	2.37891e-06	-0.000377842	3.68226e-05	178.405	-0.278641	0.691367
1	2.1	173	0.656	49.125	-0.259489	0.665636	3.27518	34.9301	-3.79933	2.92035	-0.0126091	-0.00132449	-3.27567e-05	0.0800904	0.438138	87.6532	2.37891e-06	-0.000377842	3.68226e-05	178.405	-0.278641	0.691367
1	2.1	174	0.66	49.78	-0.228998	0.670511	3.26616	34.7135	-3.53784	2.95998	-0.0126715	-0.0013995	-3.25695e-05	0.0828847	0.440125	88.2641	2.37891e-06	-0.000377842	3.68226e-05	178.405	-0.278641	0.691367
1	2.1	175	0.664	50.435	-0.194234	0.6766	3.25488	34.6337	-3.33201	2.97399	-0.0127316	-0.00147547	-3.2491e-05	0.0857067	0.442026	88.8709	2.37891e-06	-0.000377842	3.68226e-05	178.405	-0.278641	0.691367
1	2.1	176	0.668	51.09	-0.155041	0.684333	3.24042	34.6421	-3.15837	2.96964	-0.0127906	-0.00155223	-3.2438e-05	0.0885529	0.443885	89.4769	2.37891e-06	-0.000377842	3.68226e-05	178.405	-0.278641	0.691367
1	2.1	177	0.672	51.745	-0.11199	0.693928	3.22224	34.6666	-2.98757	2.95708	-0.0128499	-0.00162952	-3.2294e-05	0.091419	0.445759	90.0867	2.37891e-06	-0.000377842	3.68226e-05	178.405	-0.278641	0.691367
1	2.1	178	0.676	52.4	-0.0655455	0.7052	3.20071	34.7058	-2.81998	2.93703	-0.0129094	-0.00170722	-3.20818e-05	0.0942997	0.447633	90.6984	2.37891e-06	-0.000377842	3.68226e-05	178.405	-0.278641	0.691367
1	2.1	179	0.68	53.055	-0.0161705	0.717963	3.1762	34.7581	-2.65596	2.91019	-0.0129685	-0.00178522	-3.18242e-05	0.0971898	0.449494	91.3102	2.37891e-06	-0.000377842	3.68226e-05	178.405	-0.278641	0.691367
1	2.1	180	0.684	53.71	0.0356689	0.732031	3.14906	34.8223	-2.49587	2.87728	-0.0130269	-0.00186338	-3.15438e-05	0.100084	0.451331	91.9204	2.37891e-06	-0.000377842	3.68226e-05	178.405	-0.278641	0.691367
1	2.1	181	0.688	54.365	0.0895085	0.74722	3.11968	34.897	-2.34007	2.83902	-0.0130842	-0.0019416	-3.12634e-05	0.102977	0.45313	92.527	2.37891e-06	-0.000377842	3.68226e-05	178.405	-0.278641	0.691367
1	2.1	182	0.692	55.02	0.144885	0.763344	3.08841	34.9807	-2.18891	2.79611	-0.0131401	-0.00201974	-3.10058e-05	0.105864	0.454878	93.1283	2.37891e-06	-0.000377842	3.68226e-05	178.405	-0.278641	0.691367
1	2.1	183	0.696	55.675	0.201331	0.780218	3.05563	35.0721	-2.04277	2.74928	-0.0131941	-0.00209769	-3.07936e-05	0.108739	0.456563	93.7224	2.37891e-06	-0.000377842	3.68226e-05	178.405	-0.278641	0.691367
1	2.1	184	0.7	56.33	0.258384	0.797656	3.02169	35.1698	-1.90201	2.69923	-0.0132459	-0.00217533	-3.06496e-05	0.111597	0.45817	94.3076	2.37891e-06	-0.000377842	3.68226e-05	178.405	-0.278641	0.691367
1	2.1	185	0.704	56.985	0.315579	0.815474	2.98697	35.2723	-1.76697	2.64668	-0.0132951	-0.00225254	-3.05966e-05	0.114433	0.459688	94.8821	2.37891e-06	-0.000377842	3.68226e-05	178.405	-0.278641	0.691367
1	2.1	186	0.708	57.64	0.372451	0.833485	2.95184	35.3783	-1.63803	2.59235	-0.0133448	-0.00233417	-3.05531e-05	0.117425	0.46121	95.4818	2.37891e-06	-0.000377842	3.68226e-05	178.405	-0.278641	0.691367
1	2.1	187	0.712	58.295	0.428536	0.851504	2.91665	35.4864	-1.51555	2.53695	-0.0133976	-0.00242384	-3.04306e-05	0.120707	0.46282	96.1346	2.37891e-06	-0.000377842	3.68226e-05	178.405	-0.278641	0.691367
1	2.1	188	0.716	58.95	0.483369	0.869347	2.88177	35.5952	-1.39989	2.48119	-0.0134526	-0.00251951	-3.02415e-05	0.124206	0.464489	96.8264	2.37891e-06	-0.000377842	3.68226e-05	178.405	-0.278641	0.691367
1	2.1	189	0.72	59.605	0.536485	0.886827	2.84759	35.7033	-1.2914	2.42578	-0.0135087	-0.00261917	-2.99977e-05	0.127847	0.466189	97.5434	2.37891e-06	-0.000377842	3.68226e-05	178.405	-0.278641	0.691367
1	2.1	190	0.724	60.26	0.587419	0.90376	2.81444	35.8093	-1.19046	2.37145	-0.013565	-0.00272078	-2.97114e-05	0.131557	0.467892	98.2714	2.37891e-06	-0.000377842	3.68226e-05	178.405	-0.278641	0.691367
1	2.1	191	0.728	60.915	0.635709	0.919959	2.78272	35.9118	-1.09741	2.3189	-0.0136206	-0.00282233	-2.93947e-05	0.135262	0.469567	98.9966	2.37891e-06	-0.000377842	3.68226e-05	178.405	-0.278641	0.691367
1	2.1	192	0.732	61.57	0.680887	0.935241	2.75278	36.0095	-1.01262	2.26886	-0.0136745	-0.00292178	-2.90599e-05	0.13889	0.471188	99.7048	2.37891e-06	-0.000377842	3.68226e-05	178.405	-0.278641	0.691367
1	2.1	193	0.736	62.225	0.722491	0.949418	2.72499	36.1009	-0.93646	2.22202	-0.0137256	-0.00301712	-2.8719e-05	0.142366	0.472725	100.382	2.37891e-06	-0.000377842	3.68226e-05	178.405	-0.278641	0.691367
1	2.1	194	0.74	62.88	0.760054	0.962307	2.69971	36.1846	-0.869282	2.17912	-0.0137731	-0.00310631	-2.83841e-05	0.145618	0.47415	101.015	2.37891e-06	-0.000377842	3.68226e-05	178.405	-0.278641	0.691367
1	2.1	195	0.744	63.535	0.793113	0.973721	2.67731	36.2592	-0.811448	2.14085	-0.013816	-0.00318734	-2.80675e-05	0.148571	0.475434	101.588	2.37891e-06	-0.000377842	3.68226e-05	178.405	-0.278641	0.691367
1	2.1	196	0.748	64.19	0.821204	0.983476	2.65817	36.3234	-0.763319	2.10794	-0.0138532	-0.00325817	-2.77812e-05	0.151151	0.476549	102.089	2.37891e-06	-0.000377842	3.68226e-05	178.405	-0.278641	0.691367
1	2.1	197	0.752	64.845	0.843861	0.991385	2.64264	36.3758	-0.725257	2.08111	-0.0138838	-0.00331679	-2.75374e-05	0.153287	0.477466	102.503	2.37891e-06	-0.000377842	3.68226e-05	178.405	-0.278641	0.691367
1	2.1	198	0.756	65.5	0.860619	0.997264	2.6311	36.4149	-0.697623	2.06105	-0.0139069	-0.00336117	-2.73482e-05	0.154903	0.478156	102.816	2.37891e-06	-0.000377842	3.68226e-05	178.405	-0.278641	0.691367
1	2.1	199	0.76	66.155	0.871015	1.00093	2.6239	36.4394	-0.680778	2.04849	-0.0139215	-0.00338928	-2.72258e-05	0.155927	0.478591	103.014	2.37891e-06	-0.000377842	3.68226e-05	178.405	-0.278641	0.691367
1	2.1	200	0.764	66.81	0.874584	1.00219	2.62142	36.4479	-0.675083	2.04415	-0.0139266	-0.0033991	-2.71823e-05	0.156284	0.478742	103.083	2.37891e-06	-0.000377842	3.68226e-05	178.405	-0.278641	0.691367
1	3.1	51	0.088	82.3245	-0.718658	2.48979	4.07194	13.2424	-18.2092	-45.5304	0.00908074	-0.00397596	5.34867e-05	-0.540216	0.134145	75.2399	1.26701e-06	-6.79178e-05	-0.000131081	152.32	-0.687209	0.664577
1	3.1	52	0.092	82.934	-0.744276	2.45872	4.07147	14.1421	-18.6968	-46.8961	0.00913834	-0.00396435	5.39434e-05	-0.542381	0.136635	75.6539	1.26895e-06	-6.72947e-05	-0.000131655	152.955	-0.691923	0.661775
1	3.1	53	0.096	83.5435	-0.777491	2.41639	4.07018	15.1482	-19.3222	-48.2497	0.00917172	-0.00395447	5.42181e-05	-0.543528	0.138217	75.8978	1.27127e-06	-6.63348e-05	-0.000132487	153.911	-0.698871	0.657366
1	3.1	54	0.1	84.153	-0.810545	2.37053	4.06767	16.1648	-19.9319	-49.6882	0.00921405	-0.00393912	5.45756e-05	-0.544886	0.14035	76.2129	1.27321e-06	-6.51028e-05	-0.000133479	155.104	-0.707309	0.651562
1	3.1	55	0.104	84.7625	-0.835682	2.32888	4.06354	17.0963	-20.3726	-51.3079	0.00929853	-0.00391109	5.52805e-05	-0.547684	0.144491	76.8402	1.27403e-06	-6.3663e-05	-0.000134529	156.45	-0.716493	0.644578
1	3.1	56	0.108	85.372	-0.850403	2.28487	4.05505	17.9847	-20.6397	-53.3127	0.00943336	-0.0038692	5.63966e-05	-0.552248	0.150973	77.8365	1.27445e-06	-6.19251e-05	-0.000135726	158.041	-0.727144	0.636017
1	3.1	57	0.112	85.9815	-0.859879	2.23335	4.04217	18.8938	-20.8354	-55.6381	0.00959642	-0.00381825	5.77473e-05	-0.557759	0.158825	79.0411	1.27544e-06	-5.98461e-05	-0.000137137	159.931	-0.739756	0.625738
1	3.1	58	0.116	86.591	-0.867858	2.18416	4.0285	19.7605	-20.9667	-57.9786	0.00977539	-0.00376002	5.92371e-05	-0.563727	0.167546	80.3688	1.27662e-06	-5.75616e-05	-0.000138629	161.985	-0.753251	0.614334
1	3.1	59	0.12	87.2005	-0.878088	2.14713	4.01766	20.522	-21.0404	-60.0287	0.00995795	-0.00369627	6.07708e-05	-0.569667	0.176636	81.7347	1.27762e-06	-5.52072e-05	-0.000140069	164.067	-0.766549	0.602398
1	3.1	60	0.124	87.81	-0.894319	2.13209	4.01324	21.1153	-21.0634	-61.4827	0.0101318	-0.00362878	6.22528e-05	-0.57509	0.185593	83.0538	1.27803e-06	-5.29183e-05	-0.000141322	166.043	-0.77857	0.590523
1	3.1	61	0.128	88.4195	-0.917867	2.1314	4.02207	21.5756	-20.912	-62.4945	0.0102948	-0.00355969	6.36611e-05	-0.579978	0.194251	84.3054	1.2767e-06	-5.06177e-05	-0.000142412	167.971	-0.789605	0.578273
1	3.1	62	0.132	89.029	-0.946384	2.13084	4.04621	21.9855	-20.5011	-63.4184	0.0104549	-0.00348886	6.50536e-05	-0.584675	0.202886	85.5407	1.27337e-06	-4.82025e-05	-0.000143446	169.956	-0.800499	0.565207
1	3.1	63	0.136	89.6385	-0.978114	2.13041	4.08216	22.3531	-19.8956	-64.2502	0.0106147	-0.00341461	6.64545e-05	-0.589239	0.211662	86.7828	1.26904e-06	-4.577e-05	-0.000144412	171.929	-0.811006	0.551909
1	3.1	64	0.14	90.248	-1.0113	2.13008	4.1264	22.6865	-19.1603	-64.9853	0.0107766	-0.00333526	6.78878e-05	-0.593728	0.22074	88.055	1.26471e-06	-4.34178e-05	-0.000145301	173.823	-0.820881	0.538963
1	3.1	65	0.144	90.8575	-1.0442	2.12985	4.17542	22.9936	-18.3601	-65.6194	0.0109434	-0.00324915	6.93777e-05	-0.5982	0.230283	89.3802	1.26138e-06	-4.12433e-05	-0.0001461	175.567	-0.829876	0.526956
1	3.1	66	0.148	91.467	-1.07505	2.12969	4.22569	23.2827	-17.5599	-66.1482	0.0111176	-0.00315461	7.09484e-05	-0.602711	0.240456	90.7816	1.26005e-06	-3.9344e-05	-0.000146801	177.094	-0.837747	0.516472
1	3.1	67	0.152	92.0765	-1.10209	2.1296	4.27371	23.5617	-16.8246	-66.567	0.0113433	-0.00301766	7.30303e-05	-0.608066	0.254282	92.6494	1.2587e-06	-3.77902e-05	-0.000147321	178.332	-0.843855	0.507797
1	3.1	68	0.156	92.686	-1.12358	2.12955	4.31596	23.8387	-16.2191	-66.8717	0.0116077	-0.00284546	7.55057e-05	-0.61393	0.270998	94.8773	1.25572e-06	-3.662e-05	-0.000147623	179.243	-0.847901	0.501097
1	3.1	69	0.16	93.2955	-1.13776	2.12953	4.34893	24.1217	-15.8081	-67.0577	0.0118273	-0.0026981	7.75763e-05	-0.618656	0.285078	96.7434	1.25274e-06	-3.58821e-05	-0.000147763	179.804	-0.85014	0.496779
1	3.1	70	0.164	93.905	-1.14288	2.12953	4.36911	24.4189	-15.6568	-67.1207	0.011919	-0.00263563	7.84439e-05	-0.620597	0.290999	97.5258	1.25138e-06	-3.56253e-05	-0.000147798	179.996	-0.85083	0.49525
1	3.1	71	0.168	94.5145	-1.13598	2.13829	4.37936	24.7197	-15.6623	-66.7391	0.0118613	-0.0026782	7.78875e-05	-0.619487	0.287128	97.0197	1.25138e-06	-3.56253e-05	-0.000147798	179.996	-0.85083	0.49525
1	3.1	72	0.172	95.124	-1.11802	2.16297	4.38558	25.005	-15.6754	-65.789	0.0117445	-0.0027603	7.67745e-05	-0.617102	0.279474	96.0117	1.25138e-06	-3.56253e-05	-0.000147798	179.996	-0.85083	0.49525
1	3.1	73	0.176	95.7335	-1.09316	2.20119	4.38877	25.27	-15.691	-64.5628	0.0115841	-0.00286558	7.52699e-05	-0.613571	0.269296	94.657	1.25138e-06	-3.56253e-05	-0.000147798	179.996	-0.85083	0.49525
1	3.1	74	0.18	96.343	-1.06554	2.25055	4.38994	25.5098	-15.7041	-63.3528	0.01141	-0.00297829	7.36417e-05	-0.609684	0.258317	93.1927	1.25138e-06	-3.56253e-05	-0.000147798	179.996	-0.85083	0.49525
1	3.1	75	0.184	96.9525	-1.03931	2.30867	4.39011	25.7197	-15.7096	-62.4512	0.0113284	-0.00303087	7.28791e-05	-0.607852	0.253181	92.5071	1.25138e-06	-3.56253e-05	-0.000147798	179.996	-0.85083	0.49525
1	3.1	76	0.188	97.562	-1.00949	2.38443	4.38977	25.9092	-15.7073	-61.9337	0.0113616	-0.00300958	7.31894e-05	-0.608603	0.255268	92.786	1.25138e-06	-3.56253e-05	-0.000147798	179.996	-0.85083	0.49525
1	3.1	77	0.192	98.1715	-0.97333	2.47944	4.38735	26.0814	-15.7018	-61.6055	0.011441	-0.00295881	7.39293e-05	-0.610394	0.260244	93.4509	1.25138e-06	-3.56253e-05	-0.000147798	179.996	-0.85083	0.49525
1	3.1	78	0.196	98.781	-0.938273	2.58034	4.3808	26.2222	-15.6952	-61.353	0.0115356	-0.00289821	7.48126e-05	-0.612531	0.266183	94.2445	1.25138e-06	-3.56253e-05	-0.000147798	179.996	-0.85083	0.49525
1	3.1	79	0.2	99.3905	-0.911775	2.67379	4.36803	26.3172	-15.6896	-61.0627	0.011615	-0.00284745	7.55525e-05	-0.614322	0.271159	94.9094	1.25138e-06	-3.56253e-05	-0.000147798	179.996	-0.85083	0.49525
1	3.1	80	0.204	0	-0.901286	2.74643	4.34698	26.352	-15.6873	-60.621	0.0116482	-0.00282616	7.58628e-05	-0.615073	0.273246	95.1882	1.25138e-06	-3.56253e-05	-0.000147798	179.996	-0.85083	0.49525
1	3.1	81	0.208	0.6095	-0.907288	2.79306	4.30517	26.3505	-15.7002	-59.9903	0.0116384	-0.0028328	7.57703e-05	-0.614865	0.272615	95.1048	1.25138e-06	-3.56253e-05	-0.000147798	179.996	-0.85083	0.49525
1	3.1	82	0.212	1.219	-0.9216	2.8226	4.23809	26.3396	-15.7399	-59.2463	0.0116123	-0.00285042	7.55234e-05	-0.614304	0.270935	94.882	1.25138e-06	-3.56253e-05	-0.000147798	179.996	-0.85083	0.49525
1	3.1	83	0.216	1.8285	-0.938683	2.84282	4.15562	26.3099	-15.8082	-58.4454	0.0115745	-0.00287554	7.51678e-05	-0.613483	0.268522	94.5617	1.25138e-06	-3.56253e-05	-0.000147798	179.996	-0.85083	0.49525
1	3.1	84	0.22	2.438	-0.952996	2.86152	4.06765	26.2523	-15.9064	-57.644	0.0115298	-0.00290471	7.47494e-05	-0.612495	0.265695	94.1852	1.25138e-06	-3.56253e-05	-0.000147798	179.996	-0.85083	0.49525
1	3.1	85	0.224	3.0475	-0.958998	2.88647	3.98406	26.1572	-16.0364	-56.8986	0.0114831	-0.00293446	7.43142e-05	-0.611436	0.262772	93.7942	1.25138e-06	-3.56253e-05	-0.000147798	179.996	-0.85083	0.49525
1	3.1	86	0.228	3.657	-0.951086	2.91975	3.89307	25.9269	-16.2216	-56.2149	0.011432	-0.00296612	7.38409e-05	-0.610247	0.259613	93.3699	1.25138e-06	-3.56253e-05	-0.000147798	179.996	-0.85083	0.49525
1	3.1	87	0.232	4.2665	-0.93055	2.95644	3.78601	25.5315	-16.462	-55.5539	0.0113733	-0.003002	7.32989e-05	-0.608865	0.256007	92.8843	1.25138e-06	-3.56253e-05	-0.000147798	179.996	-0.85083	0.49525
1	3.1	88	0.236	4.876	-0.902186	2.99388	3.67741	25.0634	-16.7236	-54.9058	0.0113106	-0.0030401	7.27201e-05	-0.607378	0.252162	92.366	1.25138e-06	-3.56253e-05	-0.000147798	179.996	-0.85083	0.49525
1	3.1	89	0.24	5.4855	-0.870793	3.02939	3.58183	24.6147	-16.9725	-54.2603	0.0112472	-0.00307842	7.21362e-05	-0.605871	0.248287	91.8433	1.25138e-06	-3.56252e-05	-0.000147798	179.996	-0.85083	0.49525
1	3.1	90	0.244	6.095	-0.841167	3.06029	3.51381	24.2777	-17.175	-53.6073	0.0111868	-0.00311494	7.1579e-05	-0.604431	0.24459	91.3446	1.25138e-06	-3.56252e-05	-0.000147798	179.996	-0.85083	0.49525
1	3.1	91	0.248	6.7045	-0.818106	3.08393	3.4879	24.1449	-17.297	-52.9369	0.0111359	-0.00314419	7.11151e-05	-0.60317	0.241547	90.9304	1.25138e-06	-3.56252e-05	-0.000147798	179.996	-0.85083	0.49525
1	3.1	92	0.252	7.314	-0.799222	3.10209	3.49648	24.2332	-17.353	-52.2868	0.0110804	-0.00317382	7.06165e-05	-0.601717	0.238329	90.4866	1.25138e-06	-3.56252e-05	-0.000147798	179.996	-0.85083	0.49525
1	3.1	93	0.256	7.9235	-0.779477	3.11831	3.51998	24.4697	-17.3846	-51.6847	0.0110282	-0.0032023	7.01452e-05	-0.600369	0.235274	90.067	1.25138e-06	-3.56252e-05	-0.000147798	179.996	-0.85083	0.49525
1	3.1	94	0.26	8.533	-0.759695	3.13254	3.55503	24.8121	-17.3989	-51.1049	0.0109776	-0.00323021	6.9687e-05	-0.59907	0.232296	89.6589	1.25138e-06	-3.56252e-05	-0.000147798	179.996	-0.85083	0.49525
1	3.1	95	0.264	9.1425	-0.740698	3.14472	3.59828	25.2181	-17.4026	-50.5218	0.0109267	-0.00325815	6.92273e-05	-0.597765	0.229311	89.2497	1.25138e-06	-3.56252e-05	-0.000147798	179.996	-0.85083	0.495249
1	3.1	96	0.268	9.752	-0.72331	3.15481	3.64635	25.6452	-17.4029	-49.9098	0.010874	-0.00328671	6.87521e-05	-0.596398	0.226235	88.8267	1.25138e-06	-3.56252e-05	-0.000147798	179.996	-0.85083	0.495249
1	3.1	97	0.272	10.3615	-0.708354	3.16275	3.6959	26.0512	-17.4067	-49.2432	0.0108177	-0.00331648	6.82469e-05	-0.594913	0.222982	88.3772	1.25138e-06	-3.56252e-05	-0.000147798	179.996	-0.85083	0.495249
1	3.1	98	0.276	10.971	-0.696652	3.16848	3.74356	26.3936	-17.4209	-48.4965	0.0107561	-0.00334807	6.76975e-05	-0.593255	0.219468	87.8884	1.25138e-06	-3.56252e-05	-0.000147798	179.996	-0.85083	0.495249
1	3.1	99	0.28	11.5805	-0.689027	3.17196	3.78596	26.6301	-17.4525	-47.6441	0.0106876	-0.00338206	6.70895e-05	-0.591368	0.215607	87.3478	1.25138e-06	-3.56252e-05	-0.000147798	179.996	-0.85083	0.495249
1	3.1	100	0.284	12.19	-0.686303	3.17313	3.81975	26.7183	-17.5086	-46.6602	0.0106103	-0.00341904	6.64086e-05	-0.589198	0.211315	86.7426	1.25138e-06	-3.56252e-05	-0.000147798	179.996	-0.85083	0.495249
1	3.1	101	0.288	12.7995	-0.696525	3.1637	3.84316	26.6995	-17.6894	-45.3594	0.0105096	-0.00346488	6.55289e-05	-0.586288	0.205828	85.9613	1.25138e-06	-3.56252e-05	-0.000147798	179.996	-0.85083	0.495249
1	3.1	102	0.292	13.409	-0.722086	3.1394	3.85856	26.6513	-18.0186	-43.686	0.0103819	-0.00352079	6.44198e-05	-0.58252	0.198965	84.9769	1.25138e-06	-3.56252e-05	-0.000147798	179.996	-0.85083	0.495249
1	3.1	103	0.296	14.0185	-0.75533	3.10618	3.86878	26.586	-18.3879	-41.8093	0.010242	-0.00358046	6.32103e-05	-0.57834	0.191519	83.9036	1.25138e-06	-3.56252e-05	-0.000147798	179.996	-0.85083	0.495249
1	3.1	104	0.3	14.628	-0.788599	3.07003	3.87663	26.5161	-18.689	-39.8988	0.0101049	-0.00363754	6.20293e-05	-0.574196	0.184284	82.8553	1.25138e-06	-3.56252e-05	-0.000147798	179.996	-0.85083	0.495249
1	3.1	105	0.304	15.2375	-0.814235	3.03691	3.88494	26.454	-18.8134	-38.1237	0.00998556	-0.0036857	6.10057e-05	-0.570533	0.178052	81.9461	1.25138e-06	-3.56252e-05	-0.000147798	179.996	-0.85083	0.495249
1	3.1	106	0.308	15.847	-0.833299	3.00362	3.89212	26.4167	-18.8133	-36.435	0.0098732	-0.00372784	6.00525e-05	-0.566977	0.172328	81.0983	1.25138e-06	-3.56252e-05	-0.000147798	179.996	-0.85083	0.495249
1	3.1	107	0.312	16.4565	-0.850897	2.9662	3.89629	26.396	-18.8125	-34.7197	0.0097579	-0.00376819	5.90836e-05	-0.563229	0.166584	80.2358	1.25138e-06	-3.56252e-05	-0.000147798	179.996	-0.85083	0.495249
1	3.1	108	0.316	17.066	-0.865437	2.92942	3.89984	26.3662	-18.8104	-33.0515	0.00965569	-0.00380238	5.82299e-05	-0.559852	0.161561	79.4753	1.25138e-06	-3.56252e-05	-0.000147798	179.996	-0.85083	0.495249
1	3.1	109	0.32	17.6755	-0.875327	2.89807	3.90514	26.3019	-18.8063	-31.5043	0.00958262	-0.00382609	5.76218e-05	-0.557413	0.158004	78.9334	1.25138e-06	-3.56252e-05	-0.000147798	179.996	-0.85083	0.495249
1	3.1	110	0.324	18.285	-0.878978	2.87693	3.91459	26.1776	-18.7995	-30.1518	0.0095547	-0.00383496	5.739e-05	-0.556474	0.156653	78.7268	1.25138e-06	-3.56252e-05	-0.000147798	179.996	-0.85083	0.495249
1	3.1	111	0.328	18.8945	-0.870069	2.86363	3.92808	26.0146	-18.7026	-28.9398	0.00955936	-0.00383333	5.74452e-05	-0.556626	0.156885	78.7617	1.25138e-06	-3.56252e-05	-0.000147798	179.996	-0.85083	0.495249
1	3.1	112	0.332	19.504	-0.844566	2.85238	3.94362	25.8507	-18.4414	-27.7622	0.00957265	-0.00382868	5.76003e-05	-0.557058	0.157547	78.8611	1.25138e-06	-3.56252e-05	-0.000147798	179.996	-0.85083	0.495249
1	3.1	113	0.336	20.1135	-0.8043	2.84287	3.96077	25.6849	-18.0353	-26.6143	0.00959356	-0.00382136	5.784e-05	-0.557738	0.158589	79.0175	1.25138e-06	-3.56252e-05	-0.000147798	179.996	-0.85083	0.495249
1	3.1	114	0.34	20.723	-0.751106	2.83478	3.97909	25.5163	-17.5034	-25.4916	0.00962108	-0.00381172	5.8149e-05	-0.558632	0.15996	79.2234	1.25138e-06	-3.56252e-05	-0.000147798	179.996	-0.85083	0.495249
1	3.1	115	0.344	21.3325	-0.686816	2.82778	3.99813	25.3438	-16.8653	-24.3896	0.00965419	-0.00380012	5.85118e-05	-0.559708	0.16161	79.471	1.25138e-06	-3.56252e-05	-0.000147798	179.996	-0.85083	0.495249
1	3.1	116	0.348	21.942	-0.613264	2.82157	4.01746	25.1666	-16.14	-23.3037	0.00969186	-0.00378691	5.8913e-05	-0.560932	0.163489	79.7529	1.25138e-06	-3.56252e-05	-0.000147798	179.996	-0.85083	0.495249
1	3.1	117	0.352	22.5515	-0.532283	2.81582	4.03663	24.9836	-15.3471	-22.2295	0.0097331	-0.00377243	5.93374e-05	-0.562271	0.165545	80.0615	1.25138e-06	-3.56252e-05	-0.000147798	179.996	-0.85083	0.495249
1	3.1	118	0.356	23.161	-0.445706	2.81021	4.05519	24.7939	-14.5058	-21.1625	0.00977687	-0.00375705	5.97694e-05	-0.563692	0.167729	80.3891	1.25138e-06	-3.56252e-05	-0.000147798	179.996	-0.85083	0.495249
1	3.1	119	0.36	23.7705	-0.355366	2.80442	4.07272	24.5965	-13.6353	-20.098	0.00982217	-0.00374112	6.01938e-05	-0.565161	0.16999	80.7281	1.25138e-06	-3.56252e-05	-0.000147798	179.996	-0.85083	0.495249
1	3.1	120	0.364	24.38	-0.263097	2.79814	4.08876	24.3905	-12.7551	-19.0316	0.00986798	-0.00372498	6.0595e-05	-0.566647	0.172277	81.071	1.25138e-06	-3.56252e-05	-0.000147798	179.996	-0.85083	0.495249
1	3.1	121	0.368	24.9895	-0.170732	2.79103	4.10288	24.1749	-11.8844	-17.9587	0.00991328	-0.00370899	6.09578e-05	-0.568115	0.17454	81.4102	1.25138e-06	-3.56252e-05	-0.000147798	179.996	-0.85083	0.495249
1	3.1	122	0.372	25.599	-0.0801033	2.78279	4.11463	23.9486	-11.0425	-16.8749	0.00995706	-0.00369351	6.12668e-05	-0.569532	0.176728	81.7381	1.25138e-06	-3.56252e-05	-0.000147798	179.996	-0.85083	0.495249
1	3.1	123	0.376	26.2085	0.00695456	2.7731	4.12357	23.7109	-10.2488	-15.7755	0.0099983	-0.00367887	6.15065e-05	-0.570866	0.178792	82.047	1.25138e-06	-3.56252e-05	-0.000147798	179.996	-0.85083	0.495249
1	3.1	124	0.38	26.818	0.0886091	2.76163	4.12926	23.4607	-9.52252	-14.6561	0.010036	-0.00366545	6.16616e-05	-0.572083	0.18068	82.3295	1.25138e-06	-3.56252e-05	-0.000147798	179.996	-0.85083	0.495249
1	3.1	125	0.384	27.4275	0.163028	2.74806	4.13125	23.1969	-8.88304	-13.5122	0.0100691	-0.00365359	6.17168e-05	-0.57315	0.182342	82.5778	1.25138e-06	-3.56252e-05	-0.000147798	179.996	-0.85083	0.495249
1	3.1	126	0.388	28.037	0.236817	2.72803	4.12247	22.8066	-8.31053	-12.2228	0.0100954	-0.00364393	6.18016e-05	-0.573988	0.183671	82.7755	1.25138e-06	-3.56252e-05	-0.000147798	179.996	-0.85083	0.495249
1	3.1	127	0.392	28.6465	0.314641	2.699	4.10153	22.2535	-7.79803	-10.7728	0.0101151	-0.00363625	6.20039e-05	-0.574605	0.18469	82.9252	1.25138e-06	-3.56252e-05	-0.000147798	179.996	-0.85083	0.495249
1	3.1	128	0.396	29.256	0.391747	2.66344	4.07653	21.652	-7.38415	-9.31589	0.0101313	-0.0036296	6.22453e-05	-0.575097	0.18554	83.0486	1.25138e-06	-3.56252e-05	-0.000147798	179.996	-0.85083	0.495249
1	3.1	129	0.4	29.8655	0.463384	2.62381	4.05559	21.1167	-7.10751	-8.00604	0.0101468	-0.00362304	6.24476e-05	-0.57556	0.186361	83.167	1.25138e-06	-3.56252e-05	-0.000147798	179.996	-0.85083	0.495249
1	3.1	130	0.404	30.475	0.524799	2.58256	4.0468	20.7619	-7.00671	-6.99705	0.0101644	-0.00361563	6.25325e-05	-0.576092	0.187296	83.3021	1.25138e-06	-3.56252e-05	-0.000147798	179.996	-0.85083	0.495249
1	3.1	131	0.408	31.0845	0.578351	2.53646	4.06309	20.5518	-7.12417	-6.21722	0.0101824	-0.00360839	6.25809e-05	-0.576642	0.188233	83.4387	1.25138e-06	-3.56252e-05	-0.000147798	179.996	-0.85083	0.495249
1	3.1	132	0.412	31.694	0.629691	2.48264	4.10767	20.3725	-7.44746	-5.49115	0.0101976	-0.00360254	6.27123e-05	-0.577118	0.189014	83.5536	1.25138e-06	-3.56251e-05	-0.000147798	179.996	-0.85083	0.495249
1	3.1	133	0.416	32.3035	0.679011	2.42406	4.17408	20.222	-7.93302	-4.81703	0.0102113	-0.00359747	6.29059e-05	-0.577554	0.189708	83.6563	1.25138e-06	-3.56251e-05	-0.000147798	179.996	-0.85083	0.495249
1	3.1	134	0.42	32.913	0.726505	2.36367	4.25588	20.0983	-8.53727	-4.19308	0.0102246	-0.00359256	6.3141e-05	-0.577979	0.190384	83.7565	1.25138e-06	-3.56251e-05	-0.000147798	179.996	-0.85083	0.495249
1	3.1	135	0.424	33.5225	0.772363	2.30445	4.34662	19.9993	-9.2166	-3.61751	0.0102388	-0.00358717	6.33968e-05	-0.578427	0.19111	83.8635	1.25138e-06	-3.56251e-05	-0.000147798	179.996	-0.85083	0.495249
1	3.1	136	0.428	34.132	0.816777	2.24935	4.43985	19.9229	-9.92743	-3.08854	0.0102551	-0.00358068	6.36526e-05	-0.578928	0.191956	83.9871	1.25138e-06	-3.56251e-05	-0.000147798	179.996	-0.85083	0.495249
1	3.1	137	0.432	34.7415	0.859942	2.20134	4.52913	19.867	-10.6262	-2.60437	0.0102746	-0.00357247	6.38877e-05	-0.579516	0.19299	84.1366	1.25138e-06	-3.56251e-05	-0.000147798	179.996	-0.85083	0.495249
1	3.1	138	0.436	35.351	0.902047	2.16337	4.608	19.8297	-11.2693	-2.16323	0.0102986	-0.00356192	6.40813e-05	-0.580222	0.194281	84.3216	1.25138e-06	-3.56251e-05	-0.000147798	179.996	-0.85083	0.495249
1	3.1	139	0.44	35.9605	0.943285	2.13842	4.67002	19.8089	-11.8132	-1.76331	0.0103282	-0.00354839	6.42127e-05	-0.581077	0.195898	84.5517	1.25138e-06	-3.56251e-05	-0.000147798	179.996	-0.85083	0.495249
1	3.1	140	0.444	36.57	0.98385	2.12945	4.70874	19.8024	-12.2142	-1.40284	0.0103647	-0.00353127	6.42611e-05	-0.582114	0.19791	84.8365	1.25138e-06	-3.56251e-05	-0.000147798	179.996	-0.85083	0.495249
1	3.1	141	0.448	37.1795	1.02305	2.12947	4.73147	19.8159	-12.4981	-1.11389	0.0104083	-0.00351066	6.4351e-05	-0.583347	0.200319	85.1767	1.25138e-06	-3.56251e-05	-0.000147798	179.996	-0.85083	0.495249
1	3.1	142	0.452	37.789	1.06032	2.12963	4.75008	19.853	-12.7253	-0.915986	0.0104577	-0.00348734	6.46037e-05	-0.584746	0.203049	85.5624	1.25138e-06	-3.56251e-05	-0.000147798	179.996	-0.85083	0.495249
1	3.1	143	0.456	38.3985	1.09603	2.13007	4.76498	19.9085	-12.9044	-0.788495	0.010512	-0.00346165	6.49935e-05	-0.586283	0.206053	85.9865	1.25138e-06	-3.56251e-05	-0.000147798	179.996	-0.85083	0.495249
1	3.1	144	0.46	39.008	1.13057	2.13093	4.77658	19.9771	-13.0438	-0.710801	0.0105703	-0.00343396	6.54949e-05	-0.587929	0.209282	86.442	1.25138e-06	-3.56251e-05	-0.000147798	179.996	-0.85083	0.495249
1	3.1	145	0.464	39.6175	1.1643	2.13235	4.7853	20.0536	-13.152	-0.662277	0.0106317	-0.00340462	6.60824e-05	-0.589653	0.212688	86.9219	1.25138e-06	-3.56251e-05	-0.000147798	179.996	-0.85083	0.495249
1	3.1	146	0.468	40.227	1.1976	2.13446	4.79155	20.1327	-13.2376	-0.622302	0.0106951	-0.00337398	6.67304e-05	-0.591427	0.216224	87.4192	1.25138e-06	-3.56251e-05	-0.000147798	179.996	-0.85083	0.495249
1	3.1	147	0.472	40.8365	1.23086	2.13741	4.79574	20.2091	-13.309	-0.570252	0.0107597	-0.00334242	6.74133e-05	-0.593221	0.219842	87.9269	1.25138e-06	-3.56251e-05	-0.000147798	179.996	-0.85083	0.495249
1	3.1	148	0.476	41.446	1.26444	2.14133	4.79828	20.2777	-13.3748	-0.485504	0.0108245	-0.00331027	6.81056e-05	-0.595005	0.223493	88.4379	1.25138e-06	-3.56251e-05	-0.000147798	179.996	-0.85083	0.495249
1	3.1	149	0.48	42.0555	1.29873	2.14637	4.79958	20.3332	-13.4435	-0.347434	0.0108887	-0.00327791	6.87816e-05	-0.59675	0.227129	88.9452	1.25138e-06	-3.56251e-05	-0.000147798	179.996	-0.85083	0.495249
1	3.1	150	0.484	42.665	1.33409	2.15266	4.80006	20.3704	-13.5235	-0.13542	0.0109512	-0.00324568	6.94159e-05	-0.598426	0.230703	89.4419	1.25138e-06	-3.56251e-05	-0.000147798	179.996	-0.85083	0.495249
1	3.1	151	0.488	43.2745	1.37091	2.16034	4.80013	20.3839	-13.6234	0.17116	0.0110111	-0.00321395	6.99829e-05	-0.600004	0.234167	89.9209	1.25138e-06	-3.56251e-05	-0.000147798	179.996	-0.85083	0.495249
1	3.1	152	0.492	43.884	1.40899	2.1871	4.79555	20.3389	-13.7414	0.610929	0.0110689	-0.00318256	7.05044e-05	-0.601502	0.237544	90.3857	1.25138e-06	-3.56251e-05	-0.000147798	179.996	-0.85083	0.495249
1	3.1	153	0.496	44.4935	1.44785	2.24452	4.78293	20.2165	-13.8664	1.18401	0.011126	-0.00315095	7.10213e-05	-0.60296	0.240907	90.8463	1.25138e-06	-3.56251e-05	-0.000147798	179.996	-0.85083	0.495249
1	3.1	154	0.5	45.103	1.48744	2.32358	4.76397	20.0354	-13.9927	1.8533	0.0111827	-0.00311889	7.15365e-05	-0.604384	0.244274	91.3057	1.25138e-06	-3.56251e-05	-0.000147798	179.996	-0.85083	0.495249
1	3.1	155	0.504	45.7125	1.5277	2.41524	4.74038	19.8144	-14.1149	2.58172	0.0112392	-0.00308615	7.2053e-05	-0.605778	0.247668	91.7665	1.25138e-06	-3.56251e-05	-0.000147798	179.996	-0.85083	0.495249
1	3.1	156	0.508	46.322	1.56859	2.51048	4.71384	19.5723	-14.2273	3.33215	0.0112959	-0.00305249	7.25737e-05	-0.607149	0.251108	92.2317	1.25138e-06	-3.56251e-05	-0.000147798	179.996	-0.85083	0.495249
1	3.1	157	0.512	46.9315	1.61004	2.60027	4.68605	19.328	-14.3244	4.06748	0.0113531	-0.00301768	7.31015e-05	-0.608502	0.254616	92.7041	1.25138e-06	-3.56251e-05	-0.000147798	179.996	-0.85083	0.495249
1	3.1	158	0.516	47.541	1.65201	2.67559	4.65871	19.1001	-14.4006	4.75063	0.0114111	-0.00298147	7.36393e-05	-0.609841	0.258212	93.1864	1.25138e-06	-3.56251e-05	-0.000147798	179.996	-0.85083	0.495249
1	3.1	159	0.52	48.1505	1.69445	2.72739	4.63352	18.9075	-14.4505	5.34448	0.0114701	-0.00294364	7.41902e-05	-0.611172	0.261918	93.6815	1.25138e-06	-3.56251e-05	-0.000147798	179.996	-0.85083	0.495249
1	3.1	160	0.524	48.76	1.73729	2.74667	4.61217	18.769	-14.4683	5.81194	0.0115305	-0.00290395	7.4757e-05	-0.6125	0.265753	94.1922	1.25138e-06	-3.56251e-05	-0.000147798	179.996	-0.85083	0.495249
1	3.1	161	0.528	49.3695	1.78387	2.74013	4.59319	18.673	-14.4629	6.16519	0.0115907	-0.00286436	7.53218e-05	-0.613822	0.269576	94.7007	1.25138e-06	-3.56251e-05	-0.000147798	179.996	-0.85083	0.495249
1	3.1	162	0.532	49.979	1.83606	2.72237	4.5741	18.5943	-14.4459	6.44891	0.0116495	-0.00282624	7.58715e-05	-0.615131	0.273284	95.194	1.25138e-06	-3.56251e-05	-0.000147798	179.996	-0.85083	0.495249
1	3.1	163	0.536	50.5885	1.89164	2.69621	4.55512	18.5313	-14.4158	6.67478	0.0117077	-0.00278848	7.6416e-05	-0.616427	0.276958	95.682	1.25138e-06	-3.56251e-05	-0.000147798	179.996	-0.85083	0.495248
1	3.1	164	0.54	51.198	1.94837	2.66445	4.53643	18.4822	-14.3714	6.85449	0.0117662	-0.00274996	7.69653e-05	-0.617712	0.280676	96.1748	1.25138e-06	-3.56251e-05	-0.000147798	179.996	-0.85083	0.495248
1	3.1	165	0.544	51.8075	2.00404	2.62987	4.51823	18.4453	-14.3113	6.99971	0.0118259	-0.00270958	7.75295e-05	-0.618987	0.284519	96.6822	1.25138e-06	-3.56251e-05	-0.000147798	179.996	-0.85083	0.495248
1	3.1	166	0.548	52.417	2.05642	2.5953	4.50074	18.4189	-14.2341	7.12212	0.0118878	-0.00266621	7.81184e-05	-0.620253	0.288567	97.2145	1.25138e-06	-3.56251e-05	-0.000147798	179.996	-0.85083	0.495248
1	3.1	167	0.552	53.0265	2.10329	2.56354	4.48414	18.4014	-14.1384	7.2334	0.0119526	-0.00261875	7.87421e-05	-0.621512	0.292899	97.7814	1.25138e-06	-3.56251e-05	-0.000147798	179.996	-0.85083	0.495248
1	3.1	168	0.556	53.636	2.1424	2.53737	4.46865	18.391	-14.023	7.34523	0.0120213	-0.00256608	7.94107e-05	-0.622764	0.297595	98.3931	1.25138e-06	-3.5625e-05	-0.000147798	179.996	-0.85083	0.495248
1	3.1	169	0.56	54.2455	2.17155	2.51962	4.45445	18.386	-13.8864	7.46928	0.0120947	-0.00250709	8.0134e-05	-0.624011	0.302736	99.0594	1.25138e-06	-3.5625e-05	-0.000147798	179.996	-0.85083	0.495248
1	3.1	170	0.564	54.855	2.18851	2.51308	4.44175	18.3847	-13.7274	7.61725	0.0121738	-0.00244066	8.09221e-05	-0.625254	0.3084	99.7905	1.25138e-06	-3.5625e-05	-0.000147798	179.996	-0.85083	0.495248
1	3.1	171	0.568	55.4645	2.19765	2.51888	4.43025	18.3849	-13.5488	7.7514	0.0122684	-0.00235702	8.1878e-05	-0.626598	0.315361	100.684	1.25138e-06	-3.5625e-05	-0.000147798	179.996	-0.85083	0.495248
1	3.1	172	0.572	56.074	2.20496	2.53461	4.41956	18.3856	-13.3537	7.83868	0.012383	-0.0022519	8.30488e-05	-0.6281	0.323965	101.785	1.25138e-06	-3.5625e-05	-0.000147798	179.996	-0.85083	0.495248
1	3.1	173	0.576	56.6835	2.21066	2.5578	4.40977	18.3866	-13.1409	7.89775	0.0125107	-0.00213243	8.43602e-05	-0.629688	0.333654	103.021	1.25138e-06	-3.5625e-05	-0.000147798	179.996	-0.85083	0.495248
1	3.1	174	0.58	57.293	2.21495	2.58596	4.40099	18.3878	-12.9092	7.94726	0.0126443	-0.00200574	8.57377e-05	-0.631294	0.343867	104.322	1.25138e-06	-3.5625e-05	-0.000147798	179.996	-0.85083	0.495248
1	3.1	175	0.584	57.9025	2.21801	2.6166	4.39331	18.3891	-12.6573	8.00586	0.0127767	-0.00187897	8.71072e-05	-0.632845	0.354044	105.617	1.25138e-06	-3.5625e-05	-0.000147798	179.996	-0.85083	0.495248
1	3.1	176	0.588	58.512	2.22007	2.64724	4.38681	18.3905	-12.3841	8.0922	0.012901	-0.00175925	8.83943e-05	-0.634273	0.363626	106.836	1.25138e-06	-3.5625e-05	-0.000147798	179.996	-0.850831	0.495248
1	3.1	177	0.592	59.1215	2.22132	2.6754	4.38159	18.3917	-12.0883	8.22494	0.0130099	-0.00165372	8.95248e-05	-0.635506	0.372052	107.907	1.25138e-06	-3.5625e-05	-0.000147798	179.996	-0.850831	0.495248
1	3.1	178	0.596	59.731	2.22196	2.69858	4.37775	18.3927	-11.7687	8.42273	0.0130965	-0.00156951	9.04242e-05	-0.636473	0.378764	108.76	1.25138e-06	-3.5625e-05	-0.000147798	179.996	-0.850831	0.495248
1	3.1	179	0.6	60.3405	2.2222	2.71432	4.37537	18.3933	-11.4241	8.70423	0.0131536	-0.00151375	9.10184e-05	-0.637106	0.383202	109.323	1.25138e-06	-3.5625e-05	-0.000147798	179.996	-0.850831	0.495248
1	3.1	180	0.604	60.95	2.22223	2.72012	4.37456	18.3936	-11.0533	9.08809	0.0131742	-0.00149358	9.12329e-05	-0.637332	0.384806	109.527	1.25138e-06	-3.5625e-05	-0.000147798	179.996	-0.850831	0.495248
1	3.1	181	0.608	61.5595	2.20166	2.71123	4.38672	18.3644	-10.6016	9.69083	0.0131612	-0.00151015	9.10851e-05	-0.637317	0.383623	109.383	1.25138e-06	-3.5625e-05	-0.000147798	179.996	-0.850831	0.495248
1	3.1	182	0.612	62.169	2.1442	2.68706	4.41974	18.2808	-10.04	10.5795	0.0131228	-0.0015572	9.06553e-05	-0.637215	0.380214	108.965	1.25138e-06	-3.5625e-05	-0.000147798	179.996	-0.850831	0.495248
1	3.1	183	0.616	62.7785	2.05622	2.6513	4.4684	18.1486	-9.4055	11.6985	0.0130601	-0.00163076	8.99638e-05	-0.636936	0.374794	108.297	1.25138e-06	-3.5625e-05	-0.000147798	179.996	-0.850831	0.495248
1	3.1	184	0.62	63.388	1.9441	2.60765	4.52748	17.9737	-8.73527	12.9922	0.0129741	-0.00172685	8.90309e-05	-0.636393	0.367573	107.401	1.25138e-06	-3.5625e-05	-0.000147798	179.996	-0.850831	0.495248
1	3.1	185	0.624	63.9975	1.8142	2.55983	4.59178	17.7619	-8.06638	14.405	0.012866	-0.0018415	8.78768e-05	-0.635498	0.358766	106.298	1.25138e-06	-3.5625e-05	-0.000147798	179.996	-0.850831	0.495248
1	3.1	186	0.628	64.607	1.67289	2.51155	4.65607	17.5191	-7.43592	15.8814	0.0127366	-0.00197074	8.65219e-05	-0.634163	0.348585	105.013	1.25138e-06	-3.5625e-05	-0.000147798	179.996	-0.850831	0.495248
1	3.1	187	0.632	65.2165	1.52655	2.4665	4.71516	17.2511	-6.881	17.3656	0.0125871	-0.00211058	8.49864e-05	-0.6323	0.337242	103.567	1.25138e-06	-3.5625e-05	-0.000147798	179.996	-0.850831	0.495248
1	3.1	188	0.636	65.826	1.38155	2.42839	4.76381	16.9638	-6.43869	18.8022	0.0124185	-0.00225706	8.32907e-05	-0.62982	0.32495	101.982	1.25138e-06	-3.5625e-05	-0.000147798	179.996	-0.850831	0.495248
1	3.1	189	0.64	66.4355	1.24426	2.40094	4.79683	16.663	-6.14611	20.1355	0.0122319	-0.0024062	8.1455e-05	-0.626636	0.311922	100.282	1.25138e-06	-3.5625e-05	-0.000147798	179.996	-0.850831	0.495248
1	3.1	190	0.644	67.045	1.12104	2.38784	4.80899	16.3546	-6.04034	21.3099	0.0120282	-0.00255402	7.94998e-05	-0.62266	0.29837	98.488	1.25138e-06	-3.5625e-05	-0.000147798	179.996	-0.850831	0.495248
1	3.1	191	0.648	67.6545	1.00436	2.38478	4.80697	16.0107	-6.19031	22.3136	0.0117544	-0.0027382	7.69172e-05	-0.616803	0.280797	96.1601	1.25138e-06	-3.5625e-05	-0.000147798	179.996	-0.850831	0.495248
1	3.1	192	0.652	68.264	0.883476	2.38397	4.80164	15.5906	-6.58717	23.1863	0.0113797	-0.00297664	7.34264e-05	-0.6083	0.257354	93.0455	1.25138e-06	-3.5625e-05	-0.000147798	179.996	-0.850831	0.495248
1	3.1	193	0.656	68.8735	0.759975	2.38391	4.79409	15.0809	-7.15131	23.9497	0.0109389	-0.00323571	6.93876e-05	-0.597551	0.230727	89.4496	1.25138e-06	-3.5625e-05	-0.000147798	179.996	-0.850831	0.495248
1	3.1	194	0.66	69.483	0.635454	2.38309	4.78542	14.4684	-7.80313	24.6251	0.0104666	-0.00348175	6.51613e-05	-0.584955	0.203602	85.6782	1.25138e-06	-3.5625e-05	-0.000147798	179.996	-0.850831	0.495248
1	3.1	195	0.664	70.0925	0.511496	2.38003	4.77673	13.7396	-8.46306	25.2343	0.00999756	-0.00368115	6.11076e-05	-0.570912	0.178665	82.0367	1.25138e-06	-3.5625e-05	-0.000147798	179.996	-0.850831	0.495248
1	3.1	196	0.668	70.702	0.378518	2.37403	4.76609	12.6821	-9.27049	25.8059	0.00950751	-0.0038409	5.705e-05	-0.554333	0.15509	78.3734	1.25138e-06	-3.5625e-05	-0.000147798	179.996	-0.850831	0.495248
1	3.1	197	0.672	71.3115	0.235463	2.36585	4.75276	11.3048	-10.2785	26.3256	0.0089733	-0.00398342	5.27485e-05	-0.534955	0.131088	74.4847	1.25138e-06	-3.5625e-05	-0.000147798	179.996	-0.850831	0.495248
1	3.1	198	0.676	71.921	0.0967041	2.35623	4.73965	9.92642	-11.2779	26.7503	0.00843135	-0.00409822	4.84675e-05	-0.514406	0.107895	70.598	1.25138e-06	-3.5625e-05	-0.000147798	179.996	-0.850831	0.495248
1	3.1	199	0.68	72.5305	-0.0233765	2.34589	4.72965	8.86566	-12.0597	27.0368	0.00791814	-0.00417479	4.44722e-05	-0.494316	0.08675	66.9411	1.25138e-06	-3.5625e-05	-0.000147798	179.996	-0.850831	0.495248
1	3.1	200	0.684	73.14	-0.110398	2.33554	4.72568	8.44125	-12.4148	27.1418	0.00747012	-0.00420265	4.10274e-05	-0.476317	0.0688907	63.7416	1.25138e-06	-3.5625e-05	-0.000147798	179.996	-0.850831	0.495248
1	3.1	201	0.688	73.7495	-0.171595	2.32576	4.73299	8.44567	-12.4734	26.8279	0.00709919	-0.00420052	3.82401e-05	-0.460721	0.0550063	61.0935	1.25415e-06	-3.69033e-05	-0.000147395	178.992	-0.845961	0.502432
1	3.1	202	0.692	74.359	-0.22448	2.31647	4.75283	8.45833	-12.5089	25.9495	0.00678108	-0.0041933	3.59337e-05	-0.446442	0.0442719	58.845	1.26076e-06	-4.01516e-05	-0.000146331	176.424	-0.833332	0.52061
1	3.1	203	0.696	74.9685	-0.270099	2.30742	4.78207	8.47831	-12.5272	24.6018	0.00649789	-0.00417973	3.39476e-05	-0.43301	0.0356531	56.8551	1.26865e-06	-4.44899e-05	-0.00014482	172.964	-0.815912	0.544723
1	3.1	204	0.7	75.578	-0.309501	2.29833	4.81758	8.50473	-12.5339	22.8798	0.00623172	-0.00415857	3.21214e-05	-0.419952	0.0281149	54.9827	1.27526e-06	-4.90388e-05	-0.000143079	169.28	-0.796669	0.569714
1	3.1	205	0.704	76.1875	-0.343735	2.28894	4.85621	8.53666	-12.5348	20.8788	0.00596471	-0.00412855	3.02943e-05	-0.406799	0.0206227	53.0865	1.27803e-06	-5.29183e-05	-0.000141322	166.043	-0.778571	0.590523
1	3.1	206	0.708	76.797	-0.373846	2.27899	4.89485	8.57322	-12.5358	18.694	0.00567974	-0.00408221	2.83656e-05	-0.392532	0.0129196	51.0398	1.2768e-06	-5.65822e-05	-0.000139151	162.806	-0.758306	0.609226
1	3.1	207	0.712	77.4065	-0.400885	2.26822	4.93036	8.61349	-12.5425	16.4203	0.00538874	-0.00402036	2.64424e-05	-0.377466	0.00569496	48.9368	1.27386e-06	-6.06173e-05	-0.000136423	159.122	-0.733894	0.629197
1	3.1	208	0.716	78.016	-0.425898	2.25635	4.9596	8.65658	-12.5608	14.153	0.00511736	-0.00395425	2.46758e-05	-0.363127	-0.000665185	46.9675	1.27036e-06	-6.43426e-05	-0.000133735	155.662	-0.710306	0.647321
1	3.1	209	0.72	78.6255	-0.449933	2.24313	4.97944	8.70158	-12.5963	11.9872	0.00489127	-0.00389508	2.32171e-05	-0.351041	-0.00577478	45.3222	1.26742e-06	-6.70771e-05	-0.000131684	153.095	-0.692509	0.66048
1	3.1	210	0.724	79.235	-0.474038	2.22829	4.98675	8.74758	-12.6549	10.0179	0.00473612	-0.00385408	2.22174e-05	-0.342733	-0.00924813	44.1909	1.26619e-06	-6.81399e-05	-0.000130868	152.09	-0.685472	0.665558
2	1.1	43	0.036	64.968	0.312459	3.18549	3.3053	4.47499	-20.1381	13.7334	0.00392911	-0.00258191	-1.05899e-05	-0.0617391	-0.190802	82.0107	8.86948e-07	6.92721e-05	-0.000134117	159.603	-0.815266	0.29527
2	1.1	44	0.04	66.176	0.271104	3.28812	3.41233	4.46205	-19.7123	13.3615	0.00354476	-0.00263282	-1.02757e-05	-0.0480007	-0.181872	75.8447	8.017e-07	6.68113e-05	-0.000134855	157.566	-0.688151	0.132766
2	1.1	45	0.044	67.384	0.223238	3.32842	3.45721	4.41329	-19.5337	13.0152	0.00318431	-0.00265299	-9.88238e-06	-0.0361632	-0.172175	69.9617	7.65951e-07	6.46819e-05	-0.000135449	155.81	-0.585281	-0.0107303
2	1.1	46	0.048	68.592	0.169083	3.31036	3.42025	4.0391	-19.9775	12.7846	0.00282478	-0.00260587	-9.27502e-06	-0.0257141	-0.160512	63.9912	7.47089e-07	6.27537e-05	-0.000135895	154.235	-0.50668	-0.146678
2	1.1	47	0.052	69.8	0.114533	3.2673	3.33137	3.205	-21.0357	12.6963	0.0024429	-0.00248853	-8.45047e-06	-0.0156608	-0.146544	57.6109	7.0211e-07	6.09141e-05	-0.000136232	152.748	-0.445612	-0.282331
2	1.1	48	0.056	71.008	0.0592555	3.21591	3.22362	2.11985	-22.2987	12.6152	0.00207314	-0.00233698	-7.61105e-06	-0.00677193	-0.132071	51.3763	6.48426e-07	5.93584e-05	-0.000136465	151.5	-0.402038	-0.400504
2	1.1	49	0.06	72.216	0.00291805	3.17286	3.13	0.992481	-23.3569	12.4061	0.00174999	-0.00218721	-6.95904e-06	0.000183873	-0.11889	45.843	6.03446e-07	5.82817e-05	-0.000136601	150.64	-0.375922	-0.484011
2	1.1	50	0.064	73.424	-0.0548111	3.1548	3.08355	0.0317334	-23.8007	11.9339	0.00150793	-0.00207525	-6.69675e-06	0.00443792	-0.108799	41.5665	5.84584e-07	5.78795e-05	-0.000136645	150.32	-0.367225	-0.515665
2	1.1	51	0.068	74.632	-0.111351	3.203	3.07581	-0.869739	-23.7439	9.19962	0.00135339	-0.00199914	-6.60246e-06	0.00659082	-0.102039	38.7018	5.84584e-07	5.78795e-05	-0.000136645	150.32	-0.367225	-0.515665
2	1.1	52	0.072	75.84	-0.166479	3.31999	3.07375	-1.85116	-23.6086	3.24758	0.00125965	-0.0019349	-6.37763e-06	0.00789667	-0.0974125	36.8788	5.84584e-07	5.78795e-05	-0.000136645	150.32	-0.367225	-0.515665
2	1.1	53	0.076	77.048	-0.224069	3.4644	3.07359	-2.75151	-23.4471	-4.49237	0.00121151	-0.00188542	-6.10927e-06	0.00856724	-0.0945563	35.8646	5.84584e-07	5.78795e-05	-0.000136645	150.32	-0.367225	-0.515665
2	1.1	54	0.08	78.256	-0.287992	3.59483	3.07154	-3.40979	-23.3118	-12.5905	0.00119377	-0.0018536	-5.88444e-06	0.00881429	-0.0931083	35.4267	5.84584e-07	5.78795e-05	-0.000136645	150.32	-0.367225	-0.515665
2	1.1	55	0.084	79.464	-0.362123	3.66988	3.06379	-3.665	-23.255	-19.617	0.00119124	-0.00184235	-5.79015e-06	0.00884958	-0.0927062	35.3324	5.84584e-07	5.78795e-05	-0.000136645	150.32	-0.367225	-0.515665
2	1.1	56	0.088	80.672	-0.465442	3.69719	2.98542	-3.26259	-24.1199	-25.5074	0.00128512	-0.00189763	-6.025e-06	0.00717925	-0.0970185	37.056	5.84584e-07	5.78795e-05	-0.000136645	150.32	-0.367225	-0.515665
2	1.1	57	0.092	81.88	-0.595371	3.71375	2.81568	-2.27945	-26.1823	-31.2151	0.00152576	-0.00203575	-6.61822e-06	0.00280442	-0.107953	41.4553	5.84584e-07	5.78795e-05	-0.000136645	150.32	-0.367225	-0.515665
2	1.1	58	0.096	83.088	-0.723433	3.72226	2.61707	-1.05177	-28.644	-36.8365	0.00185163	-0.00221518	-7.4028e-06	-0.00332053	-0.122508	47.3728	5.84584e-07	5.78795e-05	-0.000136645	150.32	-0.367225	-0.515665
2	1.1	59	0.1	84.296	-0.821152	3.72539	2.45207	0.0842673	-30.7064	-42.468	0.00220122	-0.00239438	-8.21174e-06	-0.0102412	-0.137679	53.6511	5.84584e-07	5.78795e-05	-0.000136645	150.32	-0.367225	-0.515665
2	1.1	60	0.104	85.504	-0.860053	3.72584	2.38318	0.792509	-31.5713	-48.206	0.002513	-0.00253181	-8.87804e-06	-0.0170034	-0.150464	59.1329	5.84584e-07	5.78795e-05	-0.000136645	150.32	-0.367225	-0.515665
2	1.1	61	0.108	86.712	-0.765146	3.65909	2.40437	1.06152	-31.1739	-54.0542	0.00278824	-0.00261168	-9.43575e-06	-0.0241702	-0.160236	63.7046	5.82067e-07	5.84552e-05	-0.000136472	150.778	-0.368011	-0.47582
2	1.1	62	0.112	87.92	-0.564873	3.50822	2.45402	1.16063	-30.2826	-60.0196	0.00307239	-0.00265243	-9.90649e-06	-0.0326639	-0.168941	68.207	5.77391e-07	5.98878e-05	-0.000136151	151.923	-0.373515	-0.376841
2	1.1	63	0.116	89.128	-0.385895	3.34727	2.51123	1.17479	-29.3492	-66.2043	0.00337027	-0.00266385	-1.01047e-05	-0.0420684	-0.177433	72.9146	5.74873e-07	6.17349e-05	-0.000135978	153.407	-0.388453	-0.249564
2	1.1	64	0.12	90.336	-0.276182	3.16778	2.56978	0.198853	-28.3629	-74.6079	0.00378409	-0.00264323	-1.04085e-05	-0.0562695	-0.187794	79.5032	5.68068e-07	6.42519e-05	-0.000135592	155.421	-0.410089	-0.0741557
2	1.1	65	0.124	91.544	-0.229523	3.01934	2.65337	-0.777074	-27.5518	-79.8474	0.00404473	-0.00262262	-1.07123e-05	-0.0656098	-0.19382	83.6409	5.61264e-07	6.74147e-05	-0.000134618	158.016	-0.474541	0.140067
2	1.1	66	0.128	92.752	-0.323785	2.95033	2.78102	0.989843	-27.1481	-79.3003	0.00403912	-0.00262345	-1.07085e-05	-0.0654011	-0.1937	83.551	5.57395e-07	7.07039e-05	-0.000133376	160.799	-0.5891	0.354349
2	1.1	67	0.132	93.96	-0.548562	2.89829	2.93486	5.20326	-26.8298	-77.8905	0.00402574	-0.00262543	-1.06993e-05	-0.0649036	-0.193413	83.3367	5.48168e-07	7.41121e-05	-0.000132029	163.695	-0.716464	0.575251
2	1.1	68	0.136	95.168	-0.816843	2.85812	3.08353	10.2321	-26.5756	-75.9645	0.00400978	-0.0026278	-1.06883e-05	-0.0643097	-0.193072	83.0809	5.37156e-07	7.75468e-05	-0.000130615	166.63	-0.85274	0.796193
2	1.1	69	0.14	96.376	-1.04162	2.8247	3.19572	14.4456	-26.3645	-73.8693	0.0039964	-0.00262978	-1.06791e-05	-0.0638121	-0.192786	82.8665	5.2793e-07	8.09156e-05	-0.000129172	169.527	-0.994041	1.0106
2	1.1	70	0.144	97.584	-1.13588	2.79295	3.24008	16.2125	-26.1752	-71.9516	0.00399079	-0.00263061	-1.06753e-05	-0.0636035	-0.192666	82.7766	5.24061e-07	8.41258e-05	-0.000127739	173.26	-1.13647	1.21189
2	1.1	71	0.148	98.792	-1.07151	2.76168	3.18379	15.8084	-26.0528	-70.2575	0.00414911	-0.00260113	-1.07691e-05	-0.0696509	-0.195852	85.33	5.18588e-07	8.69857e-05	-0.000126132	174.694	-1.30794	1.3762
2	1.1	72	0.152	0	-0.917999	2.7343	3.04957	14.8093	-26.0112	-68.5558	0.00430743	-0.00257164	-1.0863e-05	-0.0756983	-0.199039	87.8835	5.13114e-07	8.91153e-05	-0.000124705	176.128	-1.46647	1.48782
2	1.1	73	0.156	1.208	-0.734779	2.71257	2.88938	13.5351	-25.9831	-66.7774	0.00426142	-0.00258118	-1.08307e-05	-0.0739154	-0.198145	87.1388	5.11254e-07	9.06754e-05	-0.000123656	177.562	-1.58252	1.56796
2	1.1	74	0.16	2.416	-0.581271	2.69824	2.75516	12.3056	-25.9011	-64.8532	0.00416589	-0.00260061	-1.07707e-05	-0.0702233	-0.196277	85.5935	5.07798e-07	9.18553e-05	-0.000122812	179.308	-1.67671	1.62552
2	1.1	75	0.164	3.624	-0.516896	2.69307	2.69888	11.4407	-25.6977	-62.7142	0.0040846	-0.00261618	-1.07384e-05	-0.0671069	-0.194655	84.2811	5.05937e-07	9.23225e-05	-0.000122465	179.807	-1.71554	1.64757
2	1.1	76	0.168	4.832	-0.518778	2.7212	2.71106	11.0241	-24.9142	-60.3312	0.00403563	-0.00262419	-1.07236e-05	-0.0652654	-0.193632	83.4942	5.05937e-07	9.23225e-05	-0.000122465	179.995	-1.71554	1.64757
2	1.1	77	0.172	6.04	-0.523264	2.79167	2.74125	10.8427	-23.4419	-57.7504	0.00399316	-0.00263047	-1.06882e-05	-0.0636861	-0.192723	82.8137	5.05937e-07	9.23225e-05	-0.000122465	179.995	-1.71554	1.64757
2	1.1	78	0.176	7.248	-0.528619	2.88358	2.77989	10.7706	-21.7384	-55.0153	0.00395513	-0.00263553	-1.06461e-05	-0.0622866	-0.19189	82.2058	5.05937e-07	9.23225e-05	-0.000122465	179.995	-1.71554	1.64757
2	1.1	79	0.18	8.456	-0.533105	2.97605	2.81743	10.6824	-20.2615	-52.1695	0.00391945	-0.00263987	-1.06108e-05	-0.0609843	-0.191095	81.6362	5.05937e-07	9.23225e-05	-0.000122465	179.995	-1.71554	1.64757
2	1.1	80	0.184	9.664	-0.534986	3.04818	2.84432	10.4522	-19.4689	-49.2565	0.00388404	-0.00264399	-1.0596e-05	-0.0596967	-0.1903	81.0711	5.05937e-07	9.23225e-05	-0.000122465	179.995	-1.71554	1.64757
2	1.1	81	0.188	10.872	-0.514028	3.10366	2.85928	9.97886	-19.2266	-46.1652	0.00384446	-0.00264812	-1.05822e-05	-0.0582704	-0.189396	80.4402	5.05937e-07	9.23225e-05	-0.000122465	179.995	-1.71554	1.64757
2	1.1	82	0.192	12.08	-0.460057	3.1564	2.86868	9.34602	-19.0796	-42.8664	0.00380211	-0.00265193	-1.05492e-05	-0.0567603	-0.188407	79.7662	5.05937e-07	9.23225e-05	-0.000122465	179.995	-1.71554	1.64757
2	1.1	83	0.196	13.288	-0.386432	3.20089	2.87443	8.70576	-19.0041	-39.5271	0.00376364	-0.00265507	-1.05099e-05	-0.0553966	-0.187499	79.1544	5.05937e-07	9.23225e-05	-0.000122465	179.995	-1.71554	1.64757
2	1.1	84	0.2	14.496	-0.30651	3.23163	2.87847	8.21011	-18.9763	-36.314	0.00373568	-0.0026572	-1.04769e-05	-0.0544096	-0.186833	78.71	5.05937e-07	9.23225e-05	-0.000122465	179.995	-1.71554	1.64757
2	1.1	85	0.204	15.704	-0.233649	3.2431	2.8827	8.01111	-18.9723	-33.394	0.00372488	-0.00265799	-1.04631e-05	-0.0540294	-0.186575	78.5385	5.05937e-07	9.23225e-05	-0.000122465	179.995	-1.71554	1.64757
2	1.1	86	0.208	16.912	-0.170754	3.24305	2.88597	8.29252	-19.0871	-30.716	0.00372582	-0.00265795	-1.0468e-05	-0.05405	-0.186613	78.5523	5.05937e-07	9.23225e-05	-0.000122465	179.995	-1.71554	1.64757
2	1.1	87	0.212	18.12	-0.108919	3.24268	2.887	8.96358	-19.3608	-28.1686	0.00372986	-0.00265773	-1.04798e-05	-0.054168	-0.186741	78.6146	5.05937e-07	9.23225e-05	-0.000122465	179.995	-1.71554	1.64757
2	1.1	88	0.216	19.328	-0.0437881	3.24168	2.88752	9.76453	-19.6874	-25.8287	0.00373891	-0.00265712	-1.04939e-05	-0.0544683	-0.18698	78.7568	5.05937e-07	9.23225e-05	-0.000122465	179.995	-1.71554	1.64757
2	1.1	89	0.22	20.536	0.028995	3.23974	2.88928	10.4356	-19.9611	-23.773	0.00375483	-0.00265594	-1.05057e-05	-0.0550352	-0.187353	79.0104	5.05937e-07	9.23225e-05	-0.000122465	179.995	-1.71554	1.64757
2	1.1	90	0.224	21.744	0.113787	3.23654	2.894	10.717	-20.0759	-22.0781	0.00377951	-0.00265398	-1.05107e-05	-0.0559536	-0.18788	79.4067	5.05937e-07	9.23225e-05	-0.000122465	179.995	-1.71554	1.64757
2	1.1	91	0.228	22.952	0.211243	3.22976	2.90207	10.6575	-20.0109	-20.5692	0.0038088	-0.00265171	-1.05137e-05	-0.0570524	-0.188495	79.877	5.05937e-07	9.23225e-05	-0.000122465	179.995	-1.71554	1.64757
2	1.1	92	0.232	24.16	0.318075	3.21771	2.91252	10.487	-19.825	-19.0263	0.00383744	-0.00264965	-1.05224e-05	-0.0581114	-0.189116	80.3341	5.05937e-07	9.23225e-05	-0.000122465	179.995	-1.71554	1.64757
2	1.1	93	0.236	25.368	0.432731	3.20099	2.92504	10.218	-19.5316	-17.4587	0.00386564	-0.00264768	-1.05361e-05	-0.0591407	-0.189744	80.7815	5.05937e-07	9.23225e-05	-0.000122465	179.995	-1.71554	1.64757
2	1.1	94	0.24	26.576	0.553656	3.18021	2.93933	9.86272	-19.144	-15.876	0.00389358	-0.00264571	-1.05543e-05	-0.0601506	-0.190379	81.2231	5.05937e-07	9.23225e-05	-0.000122465	179.995	-1.71554	1.64757
2	1.1	95	0.244	27.784	0.679294	3.15599	2.95509	9.43353	-18.6759	-14.2876	0.00392147	-0.00264363	-1.05762e-05	-0.0611516	-0.191022	81.6624	5.05937e-07	9.23225e-05	-0.000122465	179.995	-1.71554	1.64757
2	1.1	96	0.248	28.992	0.808093	3.12892	2.97202	8.94272	-18.1405	-12.7028	0.00394949	-0.00264135	-1.06012e-05	-0.0621538	-0.191672	82.1033	5.05937e-07	9.23225e-05	-0.000122465	179.995	-1.71554	1.64757
2	1.1	97	0.252	30.2	0.938496	3.09961	2.98982	8.40264	-17.5514	-11.1311	0.00397786	-0.00263876	-1.06287e-05	-0.0631676	-0.192331	82.5492	5.05937e-07	9.23225e-05	-0.000122465	179.995	-1.71554	1.64757
2	1.1	98	0.256	31.408	1.06895	3.06869	3.00819	7.82558	-16.922	-9.58187	0.00400675	-0.00263576	-1.06582e-05	-0.0642032	-0.192999	83.0041	5.05937e-07	9.23225e-05	-0.000122465	179.995	-1.71554	1.64757
2	1.1	99	0.26	32.616	1.1979	3.03674	3.02682	7.22388	-16.2657	-8.06459	0.00403638	-0.00263225	-1.06889e-05	-0.065271	-0.193677	83.4714	5.05937e-07	9.23225e-05	-0.000122465	179.995	-1.71554	1.64757
2	1.1	100	0.264	33.824	1.3238	3.00438	3.04541	6.60987	-15.5959	-6.58864	0.00406694	-0.00262813	-1.07202e-05	-0.0663813	-0.194364	83.955	5.05937e-07	9.23225e-05	-0.000122465	179.995	-1.71554	1.64757
2	1.1	101	0.268	35.032	1.44508	2.97222	3.06366	5.99585	-14.9262	-5.16342	0.00409863	-0.00262329	-1.07515e-05	-0.0675444	-0.195061	84.4584	5.05937e-07	9.23225e-05	-0.000122465	179.995	-1.71554	1.64757
2	1.1	102	0.272	36.24	1.56019	2.94086	3.08127	5.39415	-14.2699	-3.79838	0.00413163	-0.00261763	-1.07822e-05	-0.0687705	-0.19577	84.9855	5.05937e-07	9.23225e-05	-0.000122465	179.995	-1.71554	1.64757
2	1.1	103	0.276	37.448	1.66758	2.91092	3.09794	4.8171	-13.6404	-2.50292	0.00416615	-0.00261105	-1.08117e-05	-0.0700699	-0.196489	85.5398	5.05937e-07	9.23225e-05	-0.000122465	179.995	-1.71554	1.64757
2	1.1	104	0.28	38.656	1.7657	2.88299	3.11337	4.27701	-13.0513	-1.28645	0.00420239	-0.00260345	-1.08392e-05	-0.0714531	-0.19722	86.125	5.05937e-07	9.23225e-05	-0.000122465	179.995	-1.71554	1.64757
2	1.1	105	0.284	39.864	1.85299	2.8577	3.12724	3.78621	-12.516	-0.158415	0.00424054	-0.00259472	-1.08643e-05	-0.0729302	-0.197963	86.745	5.05937e-07	9.23225e-05	-0.000122465	179.995	-1.71554	1.64757
2	1.1	106	0.288	41.072	1.92789	2.83564	3.13928	3.35701	-12.0478	0.87179	0.0042808	-0.00258477	-1.08862e-05	-0.0745115	-0.198718	87.4032	5.05937e-07	9.23225e-05	-0.000122465	179.995	-1.71554	1.64757
2	1.1	107	0.292	42.28	1.98885	2.81742	3.14916	3.00174	-11.6603	1.79476	0.00432337	-0.00257349	-1.09043e-05	-0.0762075	-0.199487	88.1034	5.05937e-07	9.23225e-05	-0.000122465	179.995	-1.71554	1.64757
2	1.1	108	0.296	43.488	2.03432	2.80366	3.15659	2.73272	-11.3669	2.60104	0.00436844	-0.00256079	-1.0918e-05	-0.0780282	-0.200268	88.8494	5.05937e-07	9.23225e-05	-0.000122465	179.995	-1.71554	1.64757
2	1.1	109	0.3	44.696	2.06274	2.79496	3.16127	2.56228	-11.181	3.28125	0.00441621	-0.00254655	-1.09267e-05	-0.0799842	-0.201064	89.6447	5.05937e-07	9.23225e-05	-0.000122465	179.995	-1.71554	1.64757
2	1.1	110	0.304	45.904	2.07256	2.79192	3.1629	2.50272	-11.116	3.82596	0.00446687	-0.00253068	-1.09297e-05	-0.0820856	-0.201874	90.4931	5.05937e-07	9.23225e-05	-0.000122465	179.995	-1.71554	1.64757
2	1.1	111	0.308	47.112	2.06539	2.79955	3.16222	2.60524	-11.1573	4.22409	0.00453372	-0.00250654	-1.09295e-05	-0.0849468	-0.20283	91.6284	5.05937e-07	9.23225e-05	-0.000122465	179.995	-1.71554	1.64757
2	1.1	112	0.312	48.32	2.04493	2.82025	3.16036	2.89221	-11.2693	4.49047	0.00462497	-0.00246993	-1.09288e-05	-0.0889491	-0.204014	93.1953	5.05937e-07	9.23225e-05	-0.000122465	179.995	-1.71554	1.64757
2	1.1	113	0.316	49.528	2.01275	2.85076	3.15763	3.3327	-11.4344	4.65448	0.00473322	-0.00242437	-1.09279e-05	-0.0937526	-0.205348	95.064	5.05937e-07	9.23225e-05	-0.000122465	179.995	-1.71554	1.64757
2	1.1	114	0.32	50.736	1.97044	2.88781	3.15431	3.89582	-11.6348	4.74551	0.00485106	-0.00237342	-1.09267e-05	-0.0990177	-0.206754	97.1047	5.05937e-07	9.23225e-05	-0.000122465	179.995	-1.71554	1.64757
2	1.1	115	0.324	51.944	1.91957	2.92813	3.15069	4.55064	-11.853	4.79297	0.00497109	-0.0023206	-1.09254e-05	-0.104405	-0.208156	99.1876	5.05937e-07	9.23225e-05	-0.000122465	179.995	-1.71554	1.64757
2	1.1	116	0.328	53.152	1.86172	2.96845	3.14708	5.26626	-12.0711	4.82624	0.00508591	-0.00226945	-1.09241e-05	-0.109574	-0.209476	101.183	5.05937e-07	9.23225e-05	-0.000122465	179.995	-1.71554	1.64757
2	1.1	117	0.332	54.36	1.79846	3.0055	3.14376	6.01177	-12.2716	4.87471	0.00518809	-0.00222352	-1.0923e-05	-0.114186	-0.210638	102.961	5.05937e-07	9.23225e-05	-0.000122465	179.995	-1.71554	1.64757
2	1.1	118	0.336	55.568	1.73138	3.03601	3.14103	6.75625	-12.4366	4.9678	0.00527025	-0.00218633	-1.0922e-05	-0.117901	-0.211563	104.391	5.05937e-07	9.23225e-05	-0.000122465	179.995	-1.71554	1.64757
2	1.1	119	0.34	56.776	1.66204	3.05672	3.13917	7.46881	-12.5487	5.13487	0.00532498	-0.00216142	-1.09214e-05	-0.120379	-0.212174	105.345	5.05937e-07	9.23225e-05	-0.000122465	179.995	-1.71554	1.64757
2	1.1	120	0.344	57.984	1.59203	3.06434	3.13849	8.11852	-12.5899	5.40534	0.00534487	-0.00215233	-1.09211e-05	-0.12128	-0.212396	105.692	5.05937e-07	9.23225e-05	-0.000122465	179.995	-1.71554	1.64757
2	1.1	121	0.348	59.192	1.4884	3.05489	3.20409	8.87203	-12.4382	5.97139	0.00534396	-0.00215913	-1.09254e-05	-0.121236	-0.212389	105.675	5.05937e-07	9.23225e-05	-0.000122465	179.995	-1.71554	1.64757
2	1.1	122	0.352	60.4	1.34225	3.03236	3.36052	9.78966	-12.0763	6.84116	0.00533759	-0.00217533	-1.09357e-05	-0.120928	-0.212343	105.559	5.05937e-07	9.23225e-05	-0.000122465	179.995	-1.71554	1.64757
2	1.1	123	0.356	61.608	1.19124	3.00547	3.54723	10.6809	-11.6444	7.76789	0.00532029	-0.00219468	-1.09479e-05	-0.12009	-0.212218	105.242	5.05937e-07	9.23225e-05	-0.000122465	179.995	-1.71554	1.64757
2	1.1	124	0.36	62.816	1.07302	2.98294	3.70366	11.3553	-11.2826	8.50487	0.00528661	-0.00221089	-1.09581e-05	-0.118459	-0.211976	104.627	5.05937e-07	9.23225e-05	-0.000122465	179.995	-1.71554	1.64757
2	1.1	125	0.364	64.024	1.02524	2.97349	3.76926	11.6225	-11.1308	8.80536	0.00523108	-0.00221768	-1.09624e-05	-0.115771	-0.211575	103.612	5.05937e-07	9.23225e-05	-0.000122465	179.995	-1.71554	1.64757
2	2.2	92	0.012	73.6	-0.838026	3.3304	3.16311	12.712	-14.0176	-32.6333	0.00486682	0.00117625	-1.66371e-06	0.0335195	0.15321	42.3065	1.36738e-08	-1.02751e-05	-2.21455e-05	152.562	-0.32204	-0.353192
2	2.2	93	0.016	74.7	-0.938099	3.35853	3.09434	14.0863	-13.9983	-37.1919	0.00510783	0.00135557	-2.25686e-06	0.0389708	0.16088	44.7771	3.14663e-08	-9.77477e-06	-2.23523e-05	154.083	-0.351046	-0.321477
2	2.2	94	0.02	75.8	-1.0206	3.37781	3.02674	15.2179	-13.9607	-41.6363	0.00532547	0.00152387	-2.75381e-06	0.044093	0.16781	47.0357	4.63735e-08	-9.35561e-06	-2.25255e-05	155.586	-0.392403	-0.281684
2	2.2	95	0.024	76.9	-1.05491	3.38497	2.97684	15.6881	-13.8987	-44.959	0.00546403	0.00163744	-2.96221e-06	0.047555	0.172226	48.5086	5.26249e-08	-9.17983e-06	-2.25982e-05	157.098	-0.447643	-0.236471
2	2.2	96	0.028	78	-1.04301	3.36818	2.95133	15.6845	-13.7788	-46.9183	0.00551659	0.00168423	-3.00067e-06	0.0489847	0.173904	49.0894	6.59371e-08	-8.95856e-06	-2.25813e-05	158.627	-0.51859	-0.182922
2	2.2	97	0.032	79.1	-1.01462	3.32416	2.93919	15.676	-13.5941	-48.1858	0.00553054	0.00169665	-3.09236e-06	0.0493641	0.174349	49.2435	9.76815e-08	-8.4309e-06	-2.25409e-05	160.157	-0.604221	-0.119268
2	2.2	98	0.036	80.2	-0.980738	3.26245	2.93038	15.6657	-13.3779	-49.1242	0.00553161	0.00169761	-3.20181e-06	0.0493932	0.174384	49.2554	1.3557e-07	-7.80111e-06	-2.24928e-05	161.674	-0.701804	-0.0498773
2	2.2	99	0.04	81.3	-0.95235	3.19259	2.91488	15.6572	-13.1639	-50.0961	0.00554556	0.00171002	-3.29351e-06	0.0497725	0.174829	49.4095	1.67315e-07	-7.27345e-06	-2.24524e-05	163.162	-0.808604	0.0208737
2	2.2	100	0.044	82.4	-0.940446	3.12413	2.88268	15.6536	-12.9853	-51.4641	0.00559812	0.00175682	-3.33196e-06	0.0512023	0.176507	49.9903	1.80627e-07	-7.05218e-06	-2.24355e-05	164.605	-0.921887	0.0886135
2	2.2	101	0.048	83.5	-0.947385	3.05225	2.83012	15.9447	-12.8512	-53.2121	0.00569978	0.00184295	-3.4539e-06	0.0538304	0.179749	51.0743	1.95215e-07	-6.84082e-06	-2.23486e-05	166.014	-1.04471	0.154469
2	2.2	102	0.052	84.6	-0.963932	2.9706	2.76389	16.639	-12.739	-55.0983	0.00583745	0.00196256	-3.80466e-06	0.0574822	0.184142	52.5509	2.30001e-07	-6.33681e-06	-2.21413e-05	167.399	-1.17889	0.221352
2	2.2	103	0.056	85.7	-0.983682	2.88638	2.68946	17.4676	-12.6357	-57.147	0.00600161	0.00212233	-4.36163e-06	0.0623736	0.189391	54.424	2.71519e-07	-5.73526e-06	-2.18939e-05	168.745	-1.31985	0.287577
2	2.2	104	0.06	86.8	-1.00023	2.8068	2.61228	18.1619	-12.5279	-59.3822	0.00618272	0.00232894	-5.10221e-06	0.0687207	0.195204	56.6975	3.06306e-07	-5.23125e-06	-2.16867e-05	170.036	-1.46301	0.351456
2	2.2	105	0.064	87.9	-1.00717	2.73909	2.53781	18.4531	-12.4024	-61.828	0.00637124	0.0025891	-6.00379e-06	0.0767393	0.201285	59.3753	3.20893e-07	-5.01989e-06	-2.15997e-05	171.258	-1.60378	0.411299
2	2.2	106	0.068	89	-1.00427	2.6873	2.45394	17.3318	-12.2535	-64.7324	0.00658553	0.00293366	-7.17147e-06	0.0873836	0.20823	62.7447	3.32562e-07	-4.85195e-06	-2.14851e-05	172.42	-1.74576	0.466618
2	2.2	107	0.072	90.1	-0.997375	2.64664	2.35702	14.658	-12.0902	-68.0791	0.00683196	0.00335817	-8.62033e-06	0.10051	0.216236	66.8031	3.60387e-07	-4.45146e-06	-2.12118e-05	173.533	-1.89202	0.51854
2	2.2	108	0.076	91.2	-0.98914	2.61099	2.26524	11.4667	-11.9208	-71.4964	0.00708297	0.00381633	-1.01927e-05	0.114687	0.224409	71.1195	3.93597e-07	-3.97346e-06	-2.08856e-05	174.581	-2.03715	0.567795
2	2.2	109	0.08	92.3	-0.98224	2.57424	2.19676	8.79284	-11.7536	-74.6129	0.00731101	0.00426182	-1.1731e-05	0.128482	0.231854	75.2631	4.21422e-07	-3.57298e-06	-2.06123e-05	175.55	-2.17572	0.615118
2	2.2	110	0.084	93.4	-0.979347	2.53026	2.16975	7.67155	-11.5968	-77.0567	0.00748855	0.00464837	-1.30775e-05	0.140467	0.237677	78.8028	4.33091e-07	-3.40503e-06	-2.04977e-05	176.423	-2.30232	0.661243
2	2.2	111	0.088	94.5	-0.980691	2.47237	2.16959	8.12753	-11.4741	-78.989	0.00760431	0.00495498	-1.41602e-05	0.14999	0.241511	81.5341	4.39709e-07	-3.29224e-06	-2.04089e-05	177.185	-2.41615	0.70541
2	2.2	112	0.092	95.6	-0.984155	2.40295	2.16952	9.30349	-11.3869	-80.7807	0.00767669	0.00521255	-1.50841e-05	0.158006	0.243953	83.7443	4.55492e-07	-3.0233e-06	-2.01971e-05	177.844	-2.52082	0.747133
2	2.2	113	0.096	96.7	-0.988892	2.32944	2.1695	10.9114	-11.3105	-82.3747	0.00772253	0.0054525	-1.59575e-05	0.16549	0.245553	85.7403	4.74331e-07	-2.70229e-06	-1.99443e-05	178.427	-2.61753	0.787548
2	2.2	114	0.1	97.8	-0.994054	2.25929	2.1695	12.6634	-11.2201	-83.7138	0.00775873	0.00570629	-1.68883e-05	0.173413	0.246859	87.8286	4.90114e-07	-2.43334e-06	-1.97325e-05	178.959	-2.70751	0.827788
2	2.2	115	0.104	98.9	-0.998791	2.19995	2.16948	14.2713	-11.0909	-84.7411	0.00780215	0.00600537	-1.79848e-05	0.182749	0.248423	90.3161	4.96732e-07	-2.32056e-06	-1.96437e-05	179.467	-2.79197	0.86899
2	2.2	116	0.108	0	-1.00226	2.15889	2.16941	15.4473	-10.8983	-85.3993	0.00784282	0.00657264	-2.00889e-05	0.200486	0.250082	95.0192	5.01621e-07	-2.18053e-06	-1.95668e-05	179.83	-2.85505	0.910521
2	2.2	117	0.112	1.1	-1.0036	2.14354	2.16925	15.9033	-10.6174	-85.6314	0.00785715	0.0069738	-2.15852e-05	0.213039	0.250805	98.3276	5.0651e-07	-2.0405e-06	-1.94899e-05	179.947	-2.87708	0.95568
2	2.2	118	0.116	2.2	-1.00289	2.17665	2.16697	15.8938	-9.92019	-83.8382	0.00785655	0.00690287	-2.12758e-05	0.210819	0.250737	97.7422	5.06249e-07	-2.00512e-06	-1.94925e-05	179.958	-2.87655	1.0053
2	2.2	119	0.12	3.3	-0.999216	2.26721	2.15713	15.8274	-8.92219	-80.1472	0.00785525	0.00676114	-2.07013e-05	0.206381	0.2506	96.5724	5.0556e-07	-1.91184e-06	-1.94993e-05	179.966	-2.87501	1.05547
2	2.2	120	0.124	4.4	-0.990288	2.40213	2.13457	15.6473	-8.26387	-77.0918	0.00785404	0.00665519	-2.03919e-05	0.203064	0.25049	95.6978	5.04586e-07	-1.77996e-06	-1.9509e-05	179.972	-2.8725	1.10609
2	2.2	121	0.128	5.5	-0.973533	2.57237	2.09307	15.2929	-8.07211	-75.4802	0.00785343	0.00662075	-2.03525e-05	0.201986	0.250448	95.4135	5.0347e-07	-1.62878e-06	-1.95201e-05	179.976	-2.8691	1.15704
2	2.2	122	0.132	6.6	-0.951398	2.76812	2.03842	14.8179	-8.00022	-74.2649	0.00785313	0.00661085	-2.02585e-05	0.201676	0.250432	95.3318	5.02353e-07	-1.4776e-06	-1.95311e-05	179.979	-2.86485	1.20822
2	2.2	123	0.136	7.7	-0.929114	2.97506	1.98347	14.3368	-7.97839	-73.1946	0.00785273	0.006608	-2.01463e-05	0.201587	0.250417	95.3082	5.01379e-07	-1.34572e-06	-1.95408e-05	179.98	-2.85982	1.25954
2	2.2	124	0.14	8.8	-0.911909	3.17891	1.94108	13.9641	-7.93678	-72.0182	0.00785181	0.0065947	-2.00522e-05	0.201171	0.250379	95.1983	5.00691e-07	-1.25243e-06	-1.95476e-05	179.98	-2.85406	1.3109
2	2.2	125	0.144	9.9	-0.905012	3.36535	1.9241	13.8145	-7.80556	-70.4845	0.00784997	0.00655347	-2.00128e-05	0.199881	0.250293	94.8577	5.00429e-07	-1.21705e-06	-1.95502e-05	179.98	-2.84762	1.36218
2	2.2	126	0.148	11	-0.92618	3.55578	1.92429	13.8316	-7.5184	-68.5693	0.00784747	0.00647681	-1.98723e-05	0.197482	0.250163	94.2269	4.99232e-07	-1.16388e-06	-1.95622e-05	179.977	-2.83911	1.41439
2	2.2	127	0.152	12.1	-0.976657	3.75973	1.92564	13.8943	-7.12184	-66.4398	0.00784301	0.00637101	-1.94963e-05	0.194172	0.249951	93.3571	4.96376e-07	-1.03707e-06	-1.95909e-05	179.97	-2.82785	1.46774
2	2.2	128	0.156	13.2	-1.03691	3.94511	1.9293	14.0196	-6.71539	-64.1326	0.00783373	0.00623928	-1.8953e-05	0.190053	0.249571	92.2697	4.92967e-07	-8.8573e-07	-1.96251e-05	179.96	-2.81501	1.5209
2	2.2	129	0.16	14.3	-1.08738	4.07987	1.93644	14.2244	-6.39856	-61.6846	0.00781682	0.00608481	-1.83107e-05	0.185227	0.248936	90.9863	4.90111e-07	-7.58929e-07	-1.96538e-05	179.949	-2.80178	1.57256
2	2.2	130	0.164	15.4	-1.10855	4.13191	1.9482	14.5257	-6.27083	-59.1323	0.00778945	0.00591081	-1.76375e-05	0.179796	0.24796	89.5287	4.88914e-07	-7.05755e-07	-1.96658e-05	179.939	-2.78932	1.62141
2	2.2	131	0.168	16.5	-1.08354	4.10577	1.971	14.9694	-6.55099	-56.4215	0.00773939	0.00567069	-1.6766e-05	0.172311	0.246229	87.4996	4.87617e-07	-6.62707e-07	-1.96779e-05	179.931	-2.77729	1.66814
2	2.2	132	0.172	17.6	-1.02161	4.03864	2.00916	15.5441	-7.21903	-53.5278	0.00766853	0.00536233	-1.56507e-05	0.162702	0.2438	84.8848	4.84526e-07	-5.60057e-07	-1.97067e-05	179.922	-2.7649	1.71363
2	2.2	133	0.176	18.7	-0.942397	3.94744	2.06068	16.181	-8.01638	-50.5325	0.00759521	0.00505558	-1.45428e-05	0.153146	0.241295	82.2798	4.80836e-07	-4.37539e-07	-1.9741e-05	179.914	-2.75268	1.75683
2	2.2	134	0.18	19.8	-0.865532	3.84909	2.12357	16.8116	-8.68444	-47.5167	0.00753776	0.0048203	-1.36937e-05	0.145817	0.239335	80.2801	4.77745e-07	-3.34888e-07	-1.97698e-05	179.906	-2.74114	1.7967
2	2.2	135	0.184	20.9	-0.810656	3.76053	2.19583	17.3671	-8.96458	-44.5617	0.00751453	0.00472636	-1.33549e-05	0.142891	0.238544	79.4812	4.76448e-07	-2.91841e-07	-1.97819e-05	179.899	-2.73081	1.83217
2	2.2	136	0.188	22	-0.786158	3.68465	2.29822	17.8429	-8.84933	-41.5244	0.00751461	0.0047266	-1.3366e-05	0.142899	0.238547	79.4833	4.75593e-07	-2.677e-07	-1.97895e-05	179.892	-2.72178	1.86274
2	2.2	137	0.192	23.1	-0.778944	3.61017	2.43209	18.2847	-8.57448	-38.3506	0.00751516	0.00472828	-1.33926e-05	0.142951	0.238565	79.4979	4.73554e-07	-2.10132e-07	-1.98077e-05	179.887	-2.7137	1.8891
2	2.2	138	0.196	24.2	-0.776434	3.53274	2.56627	18.6995	-8.24645	-35.2551	0.00751664	0.00473285	-1.34243e-05	0.143093	0.238615	79.5375	4.71121e-07	-1.41422e-07	-1.98295e-05	179.882	-2.70644	1.91204
2	2.2	139	0.2	25.3	-0.766043	3.44799	2.66963	19.0946	-7.97161	-32.4522	0.00751952	0.00474175	-1.34508e-05	0.14337	0.238711	79.6147	4.69082e-07	-8.38541e-08	-1.98477e-05	179.877	-2.69984	1.93231
2	2.2	140	0.204	26.4	-0.735188	3.35156	2.711	19.4769	-7.85635	-30.1568	0.00752428	0.00475642	-1.3462e-05	0.143826	0.23887	79.7419	4.68227e-07	-5.97124e-08	-1.98553e-05	179.873	-2.69377	1.95071
2	2.2	141	0.208	27.5	-0.645261	3.23208	2.698	19.893	-7.87347	-28.4913	0.00753372	0.00478389	-1.35723e-05	0.14468	0.239184	79.9812	4.67789e-07	-4.8172e-08	-1.98592e-05	179.87	-2.69035	1.96104
2	2.2	142	0.212	28.6	-0.487145	3.09244	2.66637	20.3383	-7.9143	-27.3128	0.00754911	0.00482907	-1.38353e-05	0.146084	0.239697	80.374	4.67351e-07	-3.66317e-08	-1.98631e-05	179.87	-2.68985	1.96251
2	2.2	143	0.216	29.7	-0.292495	2.94972	2.62715	20.7428	-7.96303	-26.4373	0.0075686	0.00489015	-1.41493e-05	0.147984	0.240349	80.9025	4.67433e-07	-3.65973e-08	-1.98618e-05	179.87	-2.68999	1.96251
2	2.2	144	0.22	30.8	-0.0929714	2.82102	2.59137	21.0367	-8.00385	-25.6807	0.00759031	0.00496535	-1.44124e-05	0.150324	0.24108	81.5487	4.67583e-07	-3.65336e-08	-1.98594e-05	179.871	-2.69069	1.96248
2	2.2	145	0.224	31.9	0.0797712	2.72342	2.57009	21.1502	-8.02097	-24.8592	0.0076124	0.00505288	-1.45227e-05	0.15305	0.241831	82.2946	4.67664e-07	-3.64992e-08	-1.98581e-05	179.872	-2.69237	1.9624
2	2.2	146	0.228	33	0.235046	2.65778	2.56115	21.1489	-7.9051	-23.9452	0.00763514	0.00514905	-1.46228e-05	0.156046	0.242609	83.1103	4.67807e-07	-3.65866e-08	-1.98558e-05	179.873	-2.69479	1.96227
2	2.2	147	0.232	34.1	0.397986	2.60979	2.55474	21.14	-7.60628	-23.043	0.00765958	0.00525159	-1.4897e-05	0.159241	0.243444	83.9795	4.68175e-07	-3.68117e-08	-1.985e-05	179.875	-2.69741	1.96207
2	2.2	148	0.236	35.2	0.560669	2.57375	2.55045	21.116	-7.1977	-22.1658	0.00768508	0.00536089	-1.53059e-05	0.162646	0.244317	84.9048	4.68679e-07	-3.71196e-08	-1.98421e-05	179.876	-2.70022	1.96181
2	2.2	149	0.24	36.3	0.715177	2.54397	2.54784	21.0691	-6.75252	-21.3269	0.00771095	0.00547737	-1.58101e-05	0.166276	0.245207	85.8888	4.69228e-07	-3.74551e-08	-1.98334e-05	179.878	-2.7032	1.9615
2	2.2	150	0.244	37.4	0.853584	2.51476	2.54651	20.9918	-6.34393	-20.5394	0.00773653	0.0056014	-1.63704e-05	0.170143	0.246092	86.9342	4.69731e-07	-3.77629e-08	-1.98255e-05	179.88	-2.70631	1.96113
2	2.2	151	0.248	38.5	0.967972	2.48043	2.54601	20.8764	-6.04511	-19.8167	0.00776114	0.00573339	-1.69473e-05	0.17426	0.246953	88.0436	4.70099e-07	-3.79881e-08	-1.98197e-05	179.882	-2.70954	1.9607
2	2.2	152	0.252	39.6	1.05042	2.4353	2.54594	20.7155	-5.92924	-19.172	0.00778411	0.00587373	-1.75016e-05	0.178639	0.247768	89.2195	4.70242e-07	-3.80754e-08	-1.98174e-05	179.884	-2.71286	1.96022
2	2.2	153	0.256	40.7	1.1018	2.38169	2.55522	20.4164	-5.96679	-18.6344	0.00780732	0.00603981	-1.81117e-05	0.183825	0.248625	90.6031	4.70573e-07	-3.88022e-08	-1.98123e-05	179.886	-2.71655	1.95961
2	2.2	154	0.26	41.8	1.13234	2.32569	2.58098	19.9334	-6.06578	-18.2009	0.00782986	0.00623615	-1.88363e-05	0.18996	0.249494	92.2312	4.71301e-07	-4.04011e-08	-1.98011e-05	179.889	-2.72071	1.95882
2	2.2	155	0.264	42.9	1.14817	2.26724	2.62012	19.329	-6.20573	-17.8367	0.00784691	0.00644386	-1.96057e-05	0.196453	0.250176	93.9499	4.72029e-07	-4.19999e-08	-1.97898e-05	179.891	-2.72507	1.95786
2	2.2	156	0.268	44	1.1554	2.20632	2.66955	18.666	-6.36616	-17.5071	0.00785367	0.006644	-2.03502e-05	0.202714	0.250471	95.6054	4.72359e-07	-4.27267e-08	-1.97847e-05	179.894	-2.72932	1.95677
2	2.2	157	0.272	45.1	1.16015	2.14288	2.72615	18.0068	-6.52659	-17.1774	0.00785327	0.00683919	-2.10803e-05	0.208824	0.250498	97.2184	4.72701e-07	-4.4191e-08	-1.97796e-05	179.896	-2.73353	1.95558
2	2.2	158	0.276	46.2	1.16852	2.07687	2.78683	17.4142	-6.66654	-16.8128	0.00785137	0.00703697	-2.18235e-05	0.215019	0.250512	98.8502	4.73453e-07	-4.74126e-08	-1.97683e-05	179.899	-2.73779	1.95426
2	2.2	159	0.28	47.3	1.18665	2.00825	2.84848	16.9506	-6.76553	-16.3785	0.00784692	0.00722582	-2.25356e-05	0.220938	0.250517	100.409	4.74205e-07	-5.06342e-08	-1.97571e-05	179.902	-2.74194	1.95274
2	2.2	160	0.284	48.4	1.22064	1.93698	2.908	16.6788	-6.80308	-15.8398	0.00783886	0.00739422	-2.31727e-05	0.226218	0.250518	101.801	4.74547e-07	-5.20985e-08	-1.9752e-05	179.904	-2.74579	1.95098
2	2.2	161	0.288	49.5	1.28121	1.8565	2.97609	16.5527	-6.64741	-15.1779	0.00782651	0.0075441	-2.38009e-05	0.23092	0.250371	103.044	4.74792e-07	-5.42584e-08	-1.97486e-05	179.906	-2.74946	1.94902
2	2.2	162	0.292	50.6	1.36562	1.76484	3.05875	16.4761	-6.27619	-14.3971	0.007811	0.00768422	-2.4453e-05	0.235319	0.249998	104.208	4.75376e-07	-5.94089e-08	-1.97405e-05	179.908	-2.75308	1.94694
2	2.2	163	0.296	51.7	1.45989	1.66886	3.1458	16.4369	-5.83314	-13.4971	0.00779394	0.00781328	-2.50351e-05	0.239372	0.2495	105.281	4.76074e-07	-6.55563e-08	-1.97309e-05	179.91	-2.7565	1.94469
2	2.2	164	0.3	52.8	1.55	1.57543	3.22709	16.4224	-5.46192	-12.4779	0.00777697	0.00792998	-2.54533e-05	0.243038	0.248979	106.253	4.76659e-07	-7.07068e-08	-1.97228e-05	179.912	-2.75958	1.94223
2	2.2	165	0.304	53.9	1.62195	1.49139	3.29244	16.4203	-5.30625	-11.3392	0.00776173	0.00803302	-2.56136e-05	0.246275	0.248538	107.113	4.76904e-07	-7.28667e-08	-1.97194e-05	179.914	-2.76218	1.93951
2	2.2	166	0.308	55	1.67799	1.41301	3.34316	16.6416	-5.3067	-10.0409	0.00774649	0.00812751	-2.57418e-05	0.249245	0.248125	107.903	4.77046e-07	-7.63721e-08	-1.97181e-05	179.915	-2.76435	1.93753
2	2.2	167	0.312	56.1	1.72746	1.33572	3.38605	17.1694	-5.30983	-8.58329	0.00773017	0.00821431	-2.60474e-05	0.251974	0.247673	108.632	4.77387e-07	-8.47313e-08	-1.97148e-05	179.916	-2.7662	1.93634
2	2.2	168	0.316	57.2	1.76697	1.26512	3.41912	17.7994	-5.31832	-7.0263	0.00771533	0.00828576	-2.64123e-05	0.254222	0.247257	109.234	4.77793e-07	-9.47084e-08	-1.97108e-05	179.917	-2.76763	1.93441
2	2.2	169	0.32	58.3	1.79316	1.20683	3.4404	18.3272	-5.33487	-5.42995	0.00770455	0.00833424	-2.67179e-05	0.255747	0.246953	109.644	4.78133e-07	-1.03068e-07	-1.97075e-05	179.918	-2.76855	1.93022
2	2.2	170	0.324	59.4	1.80264	1.16645	3.44794	18.5485	-5.36214	-3.8542	0.00770039	0.0083521	-2.68461e-05	0.256309	0.246834	109.795	4.78276e-07	-1.06573e-07	-1.97061e-05	179.918	-2.76888	1.92226
2	2.2	171	0.328	60.5	1.77145	1.14312	3.40294	18.4056	-5.7025	-2.2234	0.00771459	0.00828182	-2.65754e-05	0.2541	0.247224	109.207	4.73574e-07	-1.82795e-07	-1.98008e-05	179.652	-2.73558	1.90714
2	2.2	172	0.332	61.6	1.68676	1.12995	3.29563	18.0647	-6.50395	-0.497516	0.00774865	0.00810139	-2.58813e-05	0.24843	0.248152	107.699	4.62364e-07	-3.93246e-07	-2.00265e-05	178.93	-2.64667	1.88125
2	2.2	173	0.336	62.7	1.56188	1.12352	3.16755	17.6579	-7.53768	1.2099	0.00778973	0.0078564	-2.49403e-05	0.240731	0.249261	105.653	4.48984e-07	-7.10609e-07	-2.02958e-05	177.863	-2.51862	1.84279
2	2.2	174	0.34	63.8	1.41012	1.12041	3.06024	17.3171	-8.57484	2.78527	0.007825	0.00759245	-2.39292e-05	0.232441	0.250189	103.452	4.37773e-07	-1.10756e-06	-2.05215e-05	176.564	-2.36792	1.78995
2	2.2	175	0.344	64.9	1.2448	1.1172	3.01524	17.1742	-9.3866	4.11503	0.00784163	0.00735514	-2.30245e-05	0.224992	0.250578	101.478	4.33072e-07	-1.55677e-06	-2.06162e-05	175.143	-2.21105	1.72091
2	2.2	176	0.348	66	1.03164	1.11382	3.0475	17.5613	-9.9839	5.17155	0.00784397	0.00714357	-2.22227e-05	0.218357	0.250571	99.7286	4.16641e-07	-2.10779e-06	-2.07892e-05	173.441	-2.02648	1.62955
2	2.2	177	0.352	67.1	0.764782	1.11208	3.11848	18.413	-10.4883	5.97602	0.00784518	0.00692624	-2.1403e-05	0.211545	0.250519	97.9399	3.80493e-07	-2.78875e-06	-2.117e-05	171.363	-1.80398	1.5135
2	2.2	178	0.356	68.2	0.500136	1.11144	3.18945	19.2647	-10.837	6.48821	0.00784562	0.00670282	-2.05663e-05	0.20455	0.250378	96.0989	3.44345e-07	-3.5402e-06	-2.15507e-05	169.121	-1.57692	1.3766
2	2.2	179	0.36	69.3	0.293613	1.11135	3.22171	19.6518	-10.9673	6.66789	0.00784568	0.006473	-1.97134e-05	0.197364	0.250104	94.1926	3.27914e-07	-4.30273e-06	-2.17238e-05	166.926	-1.37869	1.22267
2	2.2	180	0.364	70.4	0.150313	1.16495	3.20517	19.3021	-10.9315	6.31397	0.00783662	0.00624041	-1.8856e-05	0.190098	0.249525	92.2562	3.10911e-07	-5.07691e-06	-2.17564e-05	164.778	-1.20881	1.05166
2	2.2	181	0.368	71.5	0.0326546	1.30492	3.16061	18.4279	-10.842	5.37568	0.00781131	0.00600736	-1.79992e-05	0.18282	0.248536	90.3171	2.68403e-07	-5.88772e-06	-2.18378e-05	162.57	-1.04544	0.865572
2	2.2	182	0.372	72.6	-0.0674544	1.50002	3.09558	17.2914	-10.7256	4.03823	0.0077726	0.00577151	-1.71352e-05	0.175458	0.24719	88.3508	2.13142e-07	-6.71225e-06	-2.19436e-05	160.351	-0.889937	0.671349
2	2.2	183	0.376	73.7	-0.158104	1.719	3.01767	16.1548	-10.6093	2.48687	0.00772333	0.00553054	-1.62558e-05	0.16794	0.245543	86.3331	1.57882e-07	-7.5276e-06	-2.20494e-05	158.172	-0.743663	0.475945
2	2.2	184	0.38	74.8	-0.247386	1.93062	2.93444	15.2806	-10.5198	0.906796	0.00766632	0.00528212	-1.5353e-05	0.160194	0.243649	84.2398	1.15374e-07	-8.31089e-06	-2.21309e-05	156.086	-0.607971	0.286307
2	2.2	185	0.384	75.9	-0.343393	2.10364	2.85346	14.9309	-10.484	-0.516781	0.00760442	0.00502391	-1.44186e-05	0.152148	0.241562	82.0466	9.837e-08	-9.03923e-06	-2.21634e-05	154.142	-0.484216	0.10938
2	2.2	186	0.388	77	-0.438539	2.22433	2.73415	14.9557	-10.7562	-1.9617	0.0075363	0.00476229	-1.3477e-05	0.144002	0.23925	79.8203	7.60501e-08	-9.73686e-06	-2.21118e-05	152.514	-0.398607	-0.0475277
2	2.2	187	0.392	78.1	-0.528216	2.31557	2.59358	15.0083	-11.3324	-3.52145	0.00743726	0.00447087	-1.24416e-05	0.134943	0.23595	77.2915	3.45986e-08	-1.03062e-05	-2.2016e-05	151.252	-0.355328	-0.181374
2	2.2	188	0.396	79.2	-0.624987	2.40098	2.52581	15.0565	-11.8519	-4.88424	0.00727507	0.00409815	-1.1138e-05	0.123381	0.230617	73.9308	1.22783e-08	-1.05417e-05	-2.19644e-05	150.225	-0.322706	-0.2916
2	2.2	189	0.4	80.3	-0.77157	2.50085	2.70781	15.09	-12.1883	-5.89145	0.00687738	0.0033771	-8.6649e-06	0.101072	0.217672	67.1182	2.39677e-09	-1.07059e-05	-2.1932e-05	149.559	-0.29937	-0.361234
2	2.2	190	0.404	81.4	-0.865903	2.55552	2.88981	15.1061	-12.3392	-6.31848	0.00658193	0.00287132	-6.93972e-06	0.0854337	0.208075	62.2821	-7.48473e-09	-1.087e-05	-2.18996e-05	149.37	-0.294961	-0.381754
2	3.2	1	0.004	27.25	-1.21243	3.3948	1.92047	-1.99433	-6.79603	-40.545	0.0117089	-0.0137662	3.54609e-06	0.204612	0.0329578	69.5615	2.52661e-07	-5.45948e-06	-6.13607e-06	179.216	-2.34427	2.66315
2	3.2	2	0.008	28	-1.19622	3.37721	1.924	-2.05484	-6.95217	-40.0217	0.0116952	-0.0137624	3.569e-06	0.204463	0.0330266	69.51	2.55817e-07	-5.50264e-06	-6.13726e-06	179.12	-2.34756	2.6969
2	3.2	3	0.012	28.75	-1.15277	3.32886	1.93439	-2.22363	-7.37062	-38.5852	0.0116584	-0.0137521	3.63041e-06	0.204066	0.0332108	69.3719	2.62761e-07	-5.59759e-06	-6.13986e-06	178.907	-2.3548	2.77352
2	3.2	4	0.016	29.5	-1.08987	3.25632	1.95135	-2.48159	-7.97643	-36.4358	0.0116052	-0.0137373	3.71931e-06	0.203491	0.0334775	69.1719	2.69704e-07	-5.69253e-06	-6.14247e-06	178.695	-2.36204	2.8561
2	3.2	5	0.02	30.25	-1.01529	3.16618	1.97457	-2.80961	-8.69467	-33.7737	0.011542	-0.0137197	3.82472e-06	0.202809	0.0337937	68.9349	2.7286e-07	-5.73569e-06	-6.14365e-06	178.598	-2.36533	2.9077
2	3.2	6	0.024	31	-0.936824	3.06502	2.00373	-3.18856	-9.45038	-30.7992	0.0114756	-0.0137012	3.93562e-06	0.202092	0.0341263	68.6854	2.73179e-07	-5.73995e-06	-6.14371e-06	178.599	-2.36533	2.92586
2	3.2	7	0.028	31.75	-0.862248	2.95943	2.03855	-3.59935	-10.1686	-27.7124	0.0114125	-0.0136835	4.04102e-06	0.20141	0.0344425	68.4484	2.73938e-07	-5.75012e-06	-6.14383e-06	178.602	-2.36534	2.9352
2	3.2	8	0.032	32.5	-0.799345	2.85598	2.07872	-4.02284	-10.7744	-24.7136	0.0113592	-0.0136687	4.12992e-06	0.200835	0.0347092	68.2484	2.74844e-07	-5.76224e-06	-6.14399e-06	178.606	-2.36535	2.93944
2	3.2	9	0.036	33.25	-0.755897	2.76128	2.12394	-4.43994	-11.1929	-22.0031	0.0113225	-0.0136584	4.19133e-06	0.200438	0.0348934	68.1103	2.75603e-07	-5.77241e-06	-6.14412e-06	178.612	-2.36535	2.94226
2	3.2	10	0.04	34	-0.739685	2.68189	2.1739	-4.83151	-11.349	-19.7811	0.0113087	-0.0136546	4.21425e-06	0.200289	0.0349622	68.0588	2.75922e-07	-5.77667e-06	-6.14417e-06	178.619	-2.36535	2.94737
2	3.2	11	0.044	34.75	-0.756095	2.61166	2.25701	-5.3171	-11.1049	-18.1132	0.0114287	-0.0136837	4.00444e-06	0.201553	0.0343236	68.5055	2.76218e-07	-5.78032e-06	-6.1445e-06	178.628	-2.36547	2.95472
2	3.2	12	0.048	35.5	-0.795226	2.54423	2.37968	-5.93643	-10.5228	-16.8309	0.0117322	-0.0137572	3.47292e-06	0.204747	0.0327052	69.6353	2.76923e-07	-5.78904e-06	-6.14528e-06	178.639	-2.36577	2.96185
2	3.2	13	0.052	36.25	-0.841932	2.48586	2.50856	-6.55067	-9.82804	-15.7835	0.0121347	-0.0138538	2.76655e-06	0.208978	0.030553	71.133	2.77765e-07	-5.79945e-06	-6.14622e-06	178.65	-2.36619	2.96883
2	3.2	14	0.056	37	-0.881064	2.4428	2.61034	-7.02101	-9.24593	-14.8204	0.0125516	-0.0139527	2.03219e-06	0.213351	0.028313	72.6834	2.7847e-07	-5.80817e-06	-6.14701e-06	178.663	-2.36666	2.97571
2	3.2	15	0.06	37.75	-0.897474	2.42132	2.65167	-7.20864	-9.00183	-13.7907	0.0128982	-0.0140328	1.41671e-06	0.216972	0.0264313	73.9712	2.78766e-07	-5.81182e-06	-6.14734e-06	178.675	-2.3671	2.98256
2	3.2	16	0.064	38.5	-0.869369	2.41356	2.65163	-7.18058	-9.07176	-12.672	0.0131053	-0.0140736	1.03375e-06	0.219082	0.0252465	74.7347	2.79302e-07	-5.81808e-06	-6.14828e-06	178.689	-2.3676	2.98916
2	3.2	17	0.068	39.25	-0.791324	2.40733	2.65139	-7.10286	-9.26694	-11.5466	0.0132926	-0.0141002	6.64608e-07	0.220914	0.0240846	75.4182	2.79837e-07	-5.82434e-06	-6.14922e-06	178.706	-2.36821	2.99541
2	3.2	18	0.072	40	-0.672745	2.40249	2.65074	-6.98516	-9.56547	-10.421	0.0135596	-0.0141387	1.39681e-07	0.22353	0.0224334	76.3937	2.80234e-07	-5.82879e-06	-6.15009e-06	178.722	-2.36883	3.00156
2	3.2	19	0.076	40.75	-0.523039	2.39885	2.64946	-6.83717	-9.94541	-9.30171	0.0138473	-0.0141778	-4.31205e-07	0.226331	0.0206333	77.4437	2.80971e-07	-5.83706e-06	-6.1517e-06	178.74	-2.36949	3.0076
2	3.2	20	0.08	41.5	-0.35161	2.39624	2.64736	-6.66855	-10.3849	-8.19528	0.0141174	-0.0142084	-9.80576e-07	0.228915	0.0188902	78.4274	2.81367e-07	-5.84151e-06	-6.15257e-06	178.758	-2.37022	3.01336
2	3.2	21	0.084	42.25	-0.167864	2.39449	2.64422	-6.48901	-10.8619	-7.10815	0.0143328	-0.0142315	-1.41825e-06	0.230978	0.0175019	79.2098	2.8161e-07	-5.84407e-06	-6.15327e-06	178.777	-2.37099	3.01888
2	3.2	22	0.088	43	0.0187921	2.39343	2.63984	-6.30821	-11.3546	-6.04685	0.0145119	-0.0142529	-1.7736e-06	0.232723	0.0163815	79.8593	2.82188e-07	-5.85016e-06	-6.15492e-06	178.797	-2.37179	3.02433
2	3.2	23	0.092	43.75	0.198953	2.39289	2.63402	-6.13585	-11.8411	-5.01787	0.0146997	-0.0142705	-2.1585e-06	0.234509	0.0151579	80.5395	2.82879e-07	-5.85743e-06	-6.15689e-06	178.817	-2.3726	3.02966
2	3.2	24	0.096	44.5	0.363214	2.39268	2.62654	-5.9816	-12.2995	-4.0277	0.014941	-0.0142825	-2.68481e-06	0.236698	0.0134599	81.4139	2.83457e-07	-5.86352e-06	-6.15855e-06	178.837	-2.37344	3.03483
2	3.2	25	0.1	45.25	0.502168	2.39266	2.6172	-5.85514	-12.7077	-3.08285	0.0152808	-0.0142869	-3.46439e-06	0.23965	0.0109162	82.6461	2.837e-07	-5.86608e-06	-6.15924e-06	178.858	-2.3743	3.03981
2	3.2	26	0.104	46	0.615219	2.40207	2.58391	-5.75538	-13.1121	-2.24714	0.0157652	-0.0142773	-4.605e-06	0.243759	0.00717381	84.4016	2.83911e-07	-5.86814e-06	-6.16002e-06	178.879	-2.37519	3.04459
2	3.2	27	0.108	46.75	0.711436	2.4245	2.51894	-5.6756	-13.547	-1.55606	0.0163642	-0.0142511	-6.03205e-06	0.248784	0.00248034	86.5714	2.84416e-07	-5.87305e-06	-6.16186e-06	178.901	-2.37611	3.04919
2	3.2	28	0.112	47.5	0.795912	2.45129	2.44366	-5.61705	-13.9731	-0.97357	0.0170087	-0.0142123	-7.58392e-06	0.254135	-0.00263486	88.9072	2.85019e-07	-5.87891e-06	-6.16407e-06	178.923	-2.37705	3.05363
2	3.2	29	0.116	48.25	0.873739	2.47372	2.3794	-5.58099	-14.3508	-0.463653	0.0176294	-0.0141649	-9.09901e-06	0.259221	-0.00764239	91.1608	2.85524e-07	-5.88382e-06	-6.16592e-06	178.945	-2.378	3.05789
2	3.2	30	0.12	49	0.950008	2.48313	2.34751	-5.56869	-14.6407	0.00972001	0.0181573	-0.0141127	-1.04157e-05	0.263449	-0.0120128	93.0837	2.85736e-07	-5.88587e-06	-6.16669e-06	178.967	-2.37894	3.06199
2	3.2	31	0.124	49.75	1.03241	2.47567	2.33976	-5.56981	-14.8729	0.453909	0.0185587	-0.0140625	-1.14427e-05	0.266578	-0.0154387	94.5488	2.85915e-07	-5.88747e-06	-6.16748e-06	178.989	-2.37989	3.06592
2	3.2	32	0.128	50.5	1.12265	2.45495	2.33354	-5.57762	-15.1009	0.859081	0.01888	-0.0140117	-1.2288e-05	0.269002	-0.0182729	95.7216	2.8634e-07	-5.89129e-06	-6.16935e-06	179.011	-2.38085	3.06968
2	3.2	33	0.132	51.25	1.21683	2.42349	2.32871	-5.59882	-15.3198	1.23547	0.0191711	-0.0139501	-1.30882e-05	0.271084	-0.0209767	96.793	2.86848e-07	-5.89584e-06	-6.17159e-06	179.033	-2.38181	3.07328
2	3.2	34	0.136	52	1.31107	2.3838	2.32507	-5.64009	-15.5249	1.5933	0.0194824	-0.0138679	-1.39799e-05	0.273188	-0.0240113	97.9537	2.87273e-07	-5.89966e-06	-6.17347e-06	179.055	-2.38276	3.07671
2	3.2	35	0.14	52.75	1.40149	2.33839	2.32246	-5.70815	-15.7115	1.94282	0.0198641	-0.0137548	-1.51001e-05	0.275676	-0.0278382	99.3946	2.87451e-07	-5.90126e-06	-6.17425e-06	179.076	-2.38369	3.07997
2	3.2	36	0.144	53.5	1.48418	2.28978	2.32072	-5.80967	-15.8748	2.29425	0.0203485	-0.0135991	-1.65489e-05	0.278744	-0.0328029	101.239	2.87594e-07	-5.90244e-06	-6.17498e-06	179.097	-2.38461	3.08307
2	3.2	37	0.148	54.25	1.55527	2.24048	2.31966	-5.95135	-16.0101	2.65783	0.0209024	-0.0134073	-1.82353e-05	0.282148	-0.0385978	103.36	2.87933e-07	-5.90524e-06	-6.17671e-06	179.118	-2.38552	3.086
2	3.2	38	0.152	55	1.61086	2.193	2.31912	-6.13989	-16.1126	3.0438	0.0214768	-0.0131974	-2.00087e-05	0.285598	-0.0447047	105.572	2.88338e-07	-5.9086e-06	-6.17878e-06	179.138	-2.38641	3.08877
2	3.2	39	0.156	55.75	1.64706	2.14986	2.31891	-6.38198	-16.1775	3.46238	0.0220232	-0.0129872	-2.17186e-05	0.288801	-0.0506048	107.691	2.88677e-07	-5.91141e-06	-6.18051e-06	179.158	-2.38727	3.09138
2	3.2	40	0.16	56.5	1.65999	2.11356	2.31889	-6.68432	-16.2002	3.92381	0.0224928	-0.0127947	-2.32144e-05	0.291465	-0.0557799	109.53	2.8882e-07	-5.91259e-06	-6.18123e-06	179.176	-2.38809	3.09382
2	3.2	41	0.164	57.25	1.64332	2.08002	2.32725	-7.15706	-16.1038	4.41853	0.0229166	-0.0125959	-2.46194e-05	0.293683	-0.0606688	111.229	2.88923e-07	-5.91338e-06	-6.18183e-06	179.194	-2.38889	3.0961
2	3.2	42	0.168	58	1.59653	2.04436	2.34996	-7.8617	-15.834	4.93061	0.0233271	-0.0123789	-2.6034e-05	0.295649	-0.0656169	112.91	2.8917e-07	-5.91527e-06	-6.18324e-06	179.212	-2.38965	3.09822
2	3.2	43	0.172	58.75	1.52451	2.00791	2.38342	-8.7319	-15.4201	5.46074	0.0236778	-0.0121795	-2.72733e-05	0.297225	-0.0699663	114.367	2.89465e-07	-5.91753e-06	-6.18493e-06	179.229	-2.39038	3.10018
2	3.2	44	0.176	59.5	1.4321	1.97201	2.42405	-9.7013	-14.8917	6.00961	0.0239222	-0.0120336	-2.81524e-05	0.298272	-0.0730586	115.392	2.89712e-07	-5.91943e-06	-6.18635e-06	179.244	-2.39106	3.10198
2	3.2	45	0.18	60.25	1.32419	1.93797	2.46826	-10.7036	-14.2779	6.57791	0.024014	-0.011977	-2.84865e-05	0.298652	-0.0742356	115.78	2.89816e-07	-5.92022e-06	-6.18694e-06	179.259	-2.39169	3.10362
2	3.2	46	0.184	61	1.20564	1.90714	2.51248	-11.6724	-13.6082	7.16634	0.0240039	-0.0120177	-2.8451e-05	0.298604	-0.0741114	115.738	2.89879e-07	-5.92067e-06	-6.18733e-06	179.272	-2.39226	3.1051
2	3.2	47	0.188	61.75	1.08131	1.88084	2.55311	-12.5414	-12.912	7.77558	0.0239328	-0.0121268	-2.8203e-05	0.298275	-0.0732423	115.445	2.90028e-07	-5.92174e-06	-6.18826e-06	179.285	-2.39279	3.10642
2	3.2	48	0.192	62.5	0.956075	1.86041	2.58657	-13.2442	-12.2185	8.40632	0.02374	-0.0122853	-2.75298e-05	0.29738	-0.0708833	114.649	2.90205e-07	-5.92302e-06	-6.18937e-06	179.296	-2.39326	3.10758
2	3.2	49	0.196	63.25	0.834796	1.84717	2.60927	-13.7146	-11.5571	9.05926	0.0233644	-0.0124739	-2.62187e-05	0.295638	-0.0662894	113.099	2.90354e-07	-5.92409e-06	-6.19029e-06	179.306	-2.39367	3.10858
2	3.2	50	0.2	64	0.722343	1.84246	2.61764	-13.8861	-10.9572	9.73508	0.0227452	-0.0126735	-2.40573e-05	0.292766	-0.0587157	110.543	2.90417e-07	-5.92454e-06	-6.19068e-06	179.315	-2.394	3.10944
2	3.2	51	0.204	64.75	0.604353	1.85827	2.61104	-13.0208	-10.3093	10.6432	0.0214207	-0.0129348	-2.01493e-05	0.2842	-0.0452999	105.431	2.90436e-07	-5.92468e-06	-6.1908e-06	179.322	-2.39424	3.11013
2	3.2	52	0.208	65.5	0.46973	1.90113	2.59328	-10.8461	-9.55884	11.8145	0.0192772	-0.0132706	-1.44772e-05	0.26813	-0.0261558	97.4612	2.90481e-07	-5.92501e-06	-6.19107e-06	179.327	-2.39441	3.11067
2	3.2	53	0.212	66.25	0.32824	1.96419	2.56744	-7.99393	-8.8176	12.9818	0.0167759	-0.0136048	-8.14622e-06	0.248404	-0.00500215	88.2605	2.90535e-07	-5.92541e-06	-6.19139e-06	179.332	-2.39451	3.11105
2	3.2	54	0.216	67	0.189645	2.0406	2.53658	-5.09625	-8.19729	13.8781	0.014378	-0.0138611	-2.26139e-06	0.228869	0.0144426	79.454	2.90581e-07	-5.92575e-06	-6.19166e-06	179.334	-2.39456	3.11128
2	3.2	55	0.22	67.75	0.0637083	2.12351	2.50379	-2.78498	-7.80967	14.2362	0.0125445	-0.0139635	2.07205e-06	0.21337	0.0284598	72.6674	2.906e-07	-5.92589e-06	-6.19177e-06	179.335	-2.39458	3.11136
2	3.2	56	0.224	68.5	-0.0632646	2.21759	2.47014	-0.903043	-7.61933	13.6644	0.0113659	-0.0138801	4.57861e-06	0.202463	0.0362877	68.2498	2.73188e-07	-5.86347e-06	-5.94566e-06	178.252	-2.24864	3.05118
2	3.2	57	0.228	69.25	-0.197785	2.32742	2.43356	0.970867	-7.50388	12.1599	0.0105348	-0.0136613	5.99509e-06	0.193584	0.0405382	65.1176	2.31667e-07	-5.71461e-06	-5.35878e-06	175.483	-1.88245	2.89149
2	3.2	58	0.232	70	-0.319307	2.44598	2.39247	2.60111	-7.44459	10.0392	0.00991556	-0.0133546	6.7347e-06	0.1859	0.042552	62.7468	1.82111e-07	-5.53694e-06	-4.6583e-06	171.751	-1.40346	2.66352
2	3.2	59	0.236	70.75	-0.407285	2.56624	2.34525	3.75204	-7.42275	7.61893	0.00937263	-0.0130072	7.21071e-06	0.178579	0.0436698	60.6137	1.40591e-07	-5.38809e-06	-4.07142e-06	167.778	-0.919142	2.39851
2	3.2	60	0.24	71.5	-0.441177	2.68119	2.29028	4.18805	-7.41963	5.21547	0.00877045	-0.0126664	7.83634e-06	0.17079	0.0452325	58.1944	1.23179e-07	-5.32566e-06	-3.82531e-06	164.285	-0.53693	2.12771
2	3.2	61	0.244	72.25	-0.427839	2.79181	2.22375	4.17573	-7.70741	2.81636	0.00802561	-0.0122609	8.64502e-06	0.161273	0.0472381	55.1015	1.11766e-07	-5.17705e-06	-3.65235e-06	160.792	-0.233958	1.78768
2	3.2	62	0.248	73	-0.396032	2.90277	2.14671	4.08945	-8.39365	0.210608	0.00722849	-0.0117591	9.36125e-06	0.150584	0.0487926	51.6841	8.45515e-08	-4.82268e-06	-3.23991e-06	156.816	0.0614085	1.35762
2	3.2	63	0.252	73.75	-0.358069	3.01261	2.06493	3.85528	-9.21272	-2.58306	0.0065042	-0.011268	9.93491e-06	0.14061	0.0498992	48.5235	5.20693e-08	-4.39971e-06	-2.74765e-06	153.08	0.314863	0.932635
2	3.2	64	0.256	74.5	-0.326262	3.11984	1.98415	3.39926	-9.89897	-5.54587	0.00597787	-0.0108949	1.03159e-05	0.133241	0.0505609	46.2009	2.48545e-08	-4.04534e-06	-2.33521e-06	150.308	0.492096	0.607879
2	3.2	65	0.26	75.25	-0.312924	3.22299	1.91013	2.64745	-10.1867	-8.65906	0.00577463	-0.0107467	1.0454e-05	0.130365	0.0507808	45.2975	1.3442e-08	-3.89673e-06	-2.16226e-06	149.224	0.558797	0.478487
2	3.2	66	0.264	76	-0.332128	3.31056	1.8425	0.00284946	-9.43225	-12.765	0.00584454	-0.0108033	1.04025e-05	0.131396	0.050754	45.6227	1.47418e-08	-3.92357e-06	-2.18707e-06	149.343	0.553585	0.491578
2	3.2	67	0.268	76.75	-0.374846	3.38552	1.80924	-3.15373	-8.67775	-17.0595	0.00597082	-0.0109036	1.03511e-05	0.133244	0.0506892	46.2061	1.60416e-08	-3.95041e-06	-2.21188e-06	149.783	0.530905	0.537933
2	3.2	68	0.272	77.5	-0.433363	3.47466	1.80926	-5.04125	-8.84786	-20.5204	0.00611623	-0.0110152	1.02935e-05	0.135343	0.0505809	46.8692	1.94419e-08	-4.01338e-06	-2.27644e-06	150.467	0.496868	0.611096
2	3.2	69	0.276	78.25	-0.499022	3.5612	1.80937	-6.50556	-9.26704	-23.6964	0.00626815	-0.0111308	1.01866e-05	0.13753	0.0504592	47.5598	2.57568e-08	-4.13032e-06	-2.39632e-06	151.312	0.453504	0.700617
2	3.2	70	0.28	79	-0.548061	3.60006	1.80969	-7.0942	-9.79855	-26.4548	0.00633839	-0.0111841	1.0129e-05	0.138539	0.0504014	47.8787	2.91571e-08	-4.19329e-06	-2.46087e-06	152.425	0.38413	0.811127
2	3.2	71	0.284	79.75	-0.574656	3.59985	1.83379	-6.51013	-10.3738	-28.8867	0.00625704	-0.0111199	1.01733e-05	0.137351	0.0504459	47.5036	3.39051e-08	-4.25474e-06	-2.54889e-06	153.773	0.293135	0.941498
2	3.2	72	0.288	80.5	-0.592046	3.59837	1.89278	-5.04962	-11.0024	-31.17	0.00606305	-0.0109665	1.0279e-05	0.134517	0.050552	46.6091	4.52273e-08	-4.40129e-06	-2.75877e-06	155.234	0.194404	1.08347
2	3.2	73	0.292	81.25	-0.605064	3.59435	1.96798	-3.15022	-11.665	-33.3022	0.00583151	-0.0107835	1.04051e-05	0.131135	0.0506786	45.5414	5.8741e-08	-4.57619e-06	-3.00928e-06	156.783	0.085496	1.23098
2	3.2	74	0.296	82	-0.618544	3.58652	2.04071	-1.2495	-12.3422	-35.2806	0.00563752	-0.0106302	1.05108e-05	0.128301	0.0507847	44.6469	7.00632e-08	-4.72274e-06	-3.21917e-06	158.399	-0.0360297	1.37795
2	3.2	75	0.3	82.75	-0.637321	3.57361	2.09233	0.214997	-13.0146	-37.1029	0.00555617	-0.0105659	1.05551e-05	0.127113	0.0508292	44.2718	7.48112e-08	-4.78419e-06	-3.30719e-06	160.059	-0.172615	1.5183
2	3.2	76	0.304	83.5	-0.666738	3.53491	2.11803	1.12663	-13.7949	-38.4146	0.00556209	-0.0105822	1.05136e-05	0.127229	0.0508261	44.3014	8.20365e-08	-4.8309e-06	-3.43406e-06	161.809	-0.329498	1.65599
2	3.2	77	0.308	84.25	-0.703573	3.46299	2.13026	1.7771	-14.6961	-39.2174	0.00560356	-0.0106384	1.04146e-05	0.127894	0.0508044	44.4975	9.92659e-08	-4.94229e-06	-3.73661e-06	163.666	-0.505049	1.79505
2	3.2	78	0.312	85	-0.739809	3.37659	2.1362	2.34137	-15.5492	-40.0429	0.00571612	-0.0107451	1.02965e-05	0.129584	0.0507455	45.0207	1.1983e-07	-5.07524e-06	-4.09771e-06	165.558	-0.691414	1.92957
2	3.2	79	0.316	85.75	-0.76743	3.29444	2.14306	2.9944	-16.1849	-41.4227	0.00593532	-0.0109131	1.01975e-05	0.132776	0.0506307	46.0316	1.3706e-07	-5.18663e-06	-4.40026e-06	167.415	-0.880734	2.05365
2	3.2	80	0.32	86.5	-0.778418	3.23525	2.15804	3.91113	-16.4344	-43.8884	0.00629669	-0.0111532	1.0156e-05	0.137945	0.0504415	47.6908	1.44285e-07	-5.23334e-06	-4.52713e-06	169.165	-1.06515	2.16136
2	3.2	81	0.324	87.25	-0.748862	3.20423	2.18723	5.38635	-16.1531	-47.8742	0.00684589	-0.0115118	9.94667e-06	0.145635	0.0498894	50.1284	1.51638e-07	-5.2464e-06	-4.64701e-06	170.857	-1.25266	2.25185
2	3.2	82	0.328	88	-0.678381	3.18889	2.22581	7.30341	-15.4824	-53.0257	0.00757566	-0.011982	9.34651e-06	0.15553	0.0486107	53.2372	1.69174e-07	-5.27754e-06	-4.93286e-06	172.536	-1.44851	2.32904
2	3.2	83	0.332	88.75	-0.59426	3.18144	2.26467	9.22014	-14.6818	-58.6916	0.00844222	-0.0124937	8.39757e-06	0.166813	0.0464731	56.8223	1.90104e-07	-5.31471e-06	-5.27405e-06	174.132	-1.64069	2.39425
2	3.2	84	0.336	89.5	-0.523779	3.17405	2.29468	10.6944	-14.0111	-64.2207	0.0094018	-0.012977	7.14181e-06	0.178667	0.0433447	60.6888	2.07639e-07	-5.34585e-06	-5.55991e-06	175.575	-1.81722	2.44878
2	3.2	85	0.34	90.25	-0.494222	3.15892	2.30671	11.2841	-13.7298	-68.9618	0.0104106	-0.013362	5.62121e-06	0.190276	0.0390934	64.6418	2.14993e-07	-5.35891e-06	-5.67978e-06	176.794	-1.9661	2.49394
2	3.2	86	0.344	91	-0.500328	3.13393	2.29766	11.0996	-13.7583	-72.9676	0.0115574	-0.0136572	3.63094e-06	0.202407	0.0330499	68.9802	2.1843e-07	-5.35665e-06	-5.73256e-06	177.82	-2.09259	2.52807
2	3.2	87	0.348	91.75	-0.514889	3.10427	2.2747	10.6596	-13.8261	-76.6724	0.0128713	-0.0139094	1.143e-06	0.215603	0.0253023	73.834	2.26625e-07	-5.35125e-06	-5.85841e-06	178.7	-2.20468	2.55032
2	3.2	88	0.352	92.5	-0.532268	3.07314	2.24414	10.1344	-13.9071	-79.9969	0.0142193	-0.0141055	-1.53535e-06	0.228716	0.0168544	78.7549	2.36406e-07	-5.34481e-06	-6.00863e-06	179.387	-2.29449	2.56314
2	3.2	89	0.356	93.25	-0.546828	3.04373	2.21227	9.69432	-13.975	-82.862	0.0154683	-0.0142327	-4.09683e-06	0.240595	0.0087103	83.2942	2.44601e-07	-5.33941e-06	-6.13448e-06	179.834	-2.35415	2.56903
2	3.2	90	0.36	94	-0.552934	3.01923	2.18538	9.50979	-14.0035	-85.1886	0.0164852	-0.014278	-6.23422e-06	0.250091	0.00187376	87.0036	2.48038e-07	-5.33715e-06	-6.18726e-06	179.994	-2.37579	2.57044
2	3.2	91	0.364	94.75	-0.552421	2.99852	2.1653	10.3969	-13.9618	-86.913	0.0172924	-0.0142455	-8.06376e-06	0.257179	-0.00408017	89.9615	2.48038e-07	-5.33715e-06	-6.18726e-06	179.994	-2.37579	2.57044
2	3.2	92	0.368	95.5	-0.548831	2.97946	2.1478	12.5123	-13.834	-88.0879	0.0179785	-0.014168	-9.79026e-06	0.262625	-0.00982075	92.467	2.48038e-07	-5.33715e-06	-6.18726e-06	179.994	-2.37579	2.57044
2	3.2	93	0.372	96.25	-0.539084	2.96375	2.13019	15.0371	-13.6161	-88.8089	0.0185102	-0.0140755	-1.12394e-05	0.266467	-0.0147105	94.4022	2.48038e-07	-5.33715e-06	-6.18726e-06	179.994	-2.37579	2.57044
2	3.2	94	0.376	97	-0.520105	2.95308	2.10977	17.1525	-13.304	-89.1715	0.0188537	-0.0139981	-1.22367e-05	0.268744	-0.0181119	95.6497	2.48038e-07	-5.33715e-06	-6.18726e-06	179.994	-2.37579	2.57044
2	3.2	95	0.38	97.75	-0.488814	2.94915	2.08383	18.0396	-12.8936	-89.2711	0.0189757	-0.0139656	-1.26079e-05	0.269494	-0.0193873	96.0916	2.48038e-07	-5.33715e-06	-6.18726e-06	179.994	-2.37579	2.57044
2	3.2	96	0.384	98.5	-0.376991	3.05027	2.04536	17.0438	-11.7204	-87.8641	0.0189615	-0.0139686	-1.25211e-05	0.269394	-0.0192555	96.0394	2.48038e-07	-5.33715e-06	-6.18726e-06	179.994	-2.37579	2.57044
2	3.2	97	0.388	99.25	-0.262731	3.20365	1.97815	15.6042	-10.7776	-85.6191	0.0189121	-0.0139786	-1.24343e-05	0.269037	-0.018801	95.8571	2.48038e-07	-5.33715e-06	-6.18726e-06	179.994	-2.37579	2.57044
2	3.2	98	0.392	0	-0.232228	3.29994	1.85394	14.6902	-11.0576	-84.0889	0.0188392	-0.0139937	-1.22312e-05	0.268513	-0.0181263	95.5879	2.48038e-07	-5.33715e-06	-6.18726e-06	179.994	-2.37579	2.57044
2	3.2	99	0.396	0.75	-0.22099	3.38612	1.71449	13.923	-11.5776	-82.6254	0.0187491	-0.0140121	-1.18541e-05	0.267864	-0.0172951	95.2553	2.48038e-07	-5.33715e-06	-6.18726e-06	179.994	-2.37579	2.57044
2	3.2	100	0.4	1.5	-0.219384	3.47165	1.64834	13.6009	-11.8576	-80.8906	0.0186229	-0.0140344	-1.16511e-05	0.266929	-0.0161615	94.7917	2.48038e-07	-5.33715e-06	-6.18726e-06	179.994	-2.37579	2.57044
2	3.2	101	0.404	2.25	-0.231744	3.57384	1.67791	13.6162	-11.4	-78.8574	0.0184764	-0.0140605	-1.15135e-05	0.265845	-0.0148433	94.254	2.48038e-07	-5.33715e-06	-6.18726e-06	179.994	-2.37579	2.57044
2	3.2	102	0.408	3	-0.263562	3.68974	1.7484	13.6525	-10.3089	-76.7253	0.0183274	-0.014089	-1.11425e-05	0.264757	-0.0134861	93.7065	2.48038e-07	-5.33715e-06	-6.18726e-06	179.994	-2.37579	2.57044
2	3.2	103	0.412	3.75	-0.306947	3.79844	1.83253	13.6959	-9.00656	-74.4962	0.0181602	-0.0141184	-1.06006e-05	0.263517	-0.0119851	93.0932	2.48038e-07	-5.33715e-06	-6.18726e-06	179.994	-2.37579	2.57044
2	3.2	104	0.416	4.5	-0.35401	3.879	1.90302	13.7323	-7.91543	-72.1718	0.0179591	-0.0141474	-9.9505e-06	0.261978	-0.0102354	92.3581	2.48038e-07	-5.33715e-06	-6.18726e-06	179.994	-2.37579	2.57044
2	3.2	105	0.42	5.25	-0.396859	3.9105	1.93258	13.7475	-7.45787	-69.7541	0.0177085	-0.0141747	-9.25466e-06	0.259995	-0.00813211	91.4451	2.48038e-07	-5.33715e-06	-6.18726e-06	179.994	-2.37579	2.57044
2	3.2	106	0.424	6	-0.442428	3.87978	1.92809	13.6227	-7.52256	-67.2089	0.0173775	-0.0142037	-8.43825e-06	0.257312	-0.00542816	90.2427	2.48038e-07	-5.33715e-06	-6.18726e-06	179.994	-2.37579	2.57044
2	3.2	107	0.428	6.75	-0.495981	3.80653	1.91738	13.3251	-7.68363	-64.5348	0.0169765	-0.0142355	-7.45955e-06	0.254028	-0.00219339	88.7881	2.48038e-07	-5.33715e-06	-6.18726e-06	179.994	-2.37579	2.57044
2	3.2	108	0.432	7.5	-0.547111	3.71911	1.9046	12.97	-7.89154	-61.7833	0.0165519	-0.0142646	-6.43087e-06	0.250523	0.00120144	87.2489	2.48038e-07	-5.33715e-06	-6.18726e-06	179.994	-2.37579	2.57044
2	3.2	109	0.436	8.25	-0.585419	3.64586	1.89389	12.6724	-8.09678	-59.0057	0.01615	-0.014286	-5.46451e-06	0.247181	0.0043857	85.7924	2.48038e-07	-5.33715e-06	-6.18726e-06	179.994	-2.37579	2.57044
2	3.2	110	0.44	9	-0.6005	3.61514	1.8894	12.5476	-8.24983	-56.2535	0.0158171	-0.0142943	-4.67276e-06	0.244383	0.00698875	84.586	2.48038e-07	-5.33715e-06	-6.18726e-06	179.994	-2.37579	2.57044
2	3.2	111	0.444	9.75	-0.577689	3.62167	1.90628	12.8189	-8.33612	-53.4368	0.0155743	-0.0142941	-4.10533e-06	0.242309	0.00884758	83.7068	2.48038e-07	-5.33715e-06	-6.18726e-06	179.994	-2.37579	2.57044
2	3.2	112	0.448	10.5	-0.51775	3.63722	1.94652	13.4988	-8.38867	-50.5214	0.0153907	-0.0142927	-3.68732e-06	0.240704	0.0102093	83.0431	2.48038e-07	-5.33715e-06	-6.18726e-06	179.994	-2.37579	2.57044
2	3.2	113	0.452	11.25	-0.433426	3.65579	1.99456	14.3865	-8.42933	-47.6419	0.0152347	-0.0142889	-3.34422e-06	0.239299	0.0113184	82.4795	2.48038e-07	-5.33715e-06	-6.18726e-06	179.994	-2.37579	2.57044
2	3.2	114	0.456	12	-0.337462	3.67134	2.0348	15.2811	-8.47991	-44.9333	0.0150747	-0.0142816	-3.00154e-06	0.237825	0.0124193	81.9005	2.48038e-07	-5.33715e-06	-6.18726e-06	179.994	-2.37579	2.57044
2	3.2	115	0.46	12.75	-0.2426	3.67786	2.05168	15.9819	-8.56224	-42.5302	0.0148788	-0.0142695	-2.58475e-06	0.236013	0.0137563	81.1906	2.48038e-07	-5.33715e-06	-6.18726e-06	179.994	-2.37579	2.57044
2	3.2	116	0.464	13.5	-0.128512	3.63115	2.02331	16.5267	-8.70699	-40.2524	0.0145996	-0.0142468	-1.99771e-06	0.233406	0.0156341	80.1764	2.48038e-07	-5.33715e-06	-6.18726e-06	179.994	-2.37579	2.57044
2	3.2	117	0.468	14.25	0.013293	3.51977	1.95566	17.0494	-8.89958	-38.0101	0.014258	-0.014214	-1.29012e-06	0.230182	0.0178895	78.9351	2.48038e-07	-5.33715e-06	-6.18726e-06	179.994	-2.37579	2.57044
2	3.2	118	0.472	15	0.152329	3.38683	1.87492	17.4932	-9.09405	-36.0736	0.0139257	-0.0141798	-6.0617e-07	0.227029	0.0200659	77.7265	2.48038e-07	-5.33715e-06	-6.18726e-06	179.994	-2.37579	2.57044
2	3.2	119	0.476	15.75	0.25811	3.27545	1.80727	17.8012	-9.24444	-34.7134	0.0136739	-0.014153	-9.00468e-08	0.224633	0.0217067	76.8106	2.48038e-07	-5.33715e-06	-6.18726e-06	179.994	-2.37579	2.57044
2	3.2	120	0.48	16.5	0.300144	3.22874	1.7789	17.9165	-9.30479	-34.1999	0.0135741	-0.0141421	1.14036e-07	0.223682	0.0223551	76.4476	2.48038e-07	-5.33715e-06	-6.18726e-06	179.994	-2.37579	2.57044
2	4.2	51	0.144	0	0.432634	3.101	2.48348	19.5794	-15.3592	-76.7795	-0.0060375	-0.0056751	1.1346e-05	0.105216	-0.140887	96.1706	9.26014e-07	9.96318e-06	-4.22003e-05	177.645	-3.02187	2.40246
2	4.2	52	0.148	0.9275	0.436078	3.16062	2.39996	18.5583	-15.3182	-76.2374	-0.0060366	-0.00575545	1.13295e-05	0.1049	-0.142562	96.9986	9.25438e-07	1.00036e-05	-4.21854e-05	177.728	-3.02578	2.40118
2	4.2	53	0.152	1.855	0.440188	3.23724	2.31939	17.3396	-15.2692	-75.4432	-0.00603513	-0.00580259	1.13098e-05	0.104623	-0.143528	97.482	9.24751e-07	1.00519e-05	-4.21675e-05	177.81	-3.02756	2.39949
2	4.2	54	0.156	2.7825	0.443632	3.31227	2.24771	16.3184	-15.2282	-74.4864	-0.00603313	-0.00582481	1.12932e-05	0.104425	-0.143972	97.708	9.24176e-07	1.00923e-05	-4.21525e-05	177.891	-3.02874	2.3977
2	4.2	55	0.16	3.71	0.445076	3.3671	2.19088	15.8902	-15.2109	-73.4564	-0.0060306	-0.00583038	1.12863e-05	0.104349	-0.144078	97.764	9.23934e-07	1.01092e-05	-4.21462e-05	177.969	-3.03087	2.39617
2	4.2	56	0.164	4.6375	0.423762	3.3966	2.15001	16.1681	-15.2734	-72.2733	-0.00602669	-0.0057432	1.12982e-05	0.104628	-0.14225	96.8657	9.2372e-07	1.01242e-05	-4.21405e-05	178.044	-3.03396	2.3949
2	4.2	57	0.168	5.565	0.370429	3.41317	2.12112	16.8306	-15.4223	-70.8776	-0.00602138	-0.00553533	1.13266e-05	0.105291	-0.13789	94.7237	9.23209e-07	1.01597e-05	-4.2127e-05	178.118	-3.03697	2.39366
2	4.2	58	0.172	6.4925	0.30099	3.42452	2.10256	17.6214	-15.6001	-69.389	-0.00601596	-0.00528723	1.13605e-05	0.106082	-0.132687	92.1671	9.226e-07	1.02022e-05	-4.21108e-05	178.189	-3.03991	2.39244
2	4.2	59	0.176	7.42	0.231359	3.43834	2.09265	18.284	-15.749	-67.9274	-0.00601176	-0.00507935	1.13889e-05	0.106745	-0.128327	90.0251	9.22089e-07	1.02378e-05	-4.20972e-05	178.259	-3.04278	2.39125
2	4.2	60	0.18	8.3475	0.177448	3.46235	2.08972	18.5618	-15.8115	-66.6125	-0.00601006	-0.00499218	1.14008e-05	0.107024	-0.126499	89.1268	9.21875e-07	1.02527e-05	-4.20916e-05	178.327	-3.04557	2.39009
2	4.2	61	0.184	9.275	0.139985	3.49991	2.09012	18.3427	-15.7888	-65.5066	-0.00601079	-0.005	1.14008e-05	0.10701	-0.126665	89.2076	9.21687e-07	1.02658e-05	-4.20865e-05	178.393	-3.04829	2.38896
2	4.2	62	0.188	10.2025	0.10836	3.54588	2.09251	17.8148	-15.7258	-64.53	-0.00601259	-0.00501954	1.14008e-05	0.106975	-0.127079	89.4096	9.21237e-07	1.02968e-05	-4.20744e-05	178.457	-3.05094	2.38785
2	4.2	63	0.192	11.13	0.0814832	3.59522	2.09864	17.1725	-15.6297	-63.5891	-0.00601493	-0.00504497	1.14009e-05	0.10693	-0.127619	89.6724	9.20701e-07	1.03339e-05	-4.206e-05	178.52	-3.05351	2.38677
2	4.2	64	0.196	12.0575	0.058267	3.64286	2.1103	16.6099	-15.5079	-62.5903	-0.00601725	-0.00507044	1.14009e-05	0.106884	-0.128159	89.9355	9.20252e-07	1.0365e-05	-4.20479e-05	178.58	-3.05602	2.38572
2	4.2	65	0.2	12.985	0.0376218	3.68374	2.12924	16.3214	-15.3678	-61.4401	-0.006019	-0.00509009	1.14009e-05	0.106848	-0.128576	90.1386	9.20064e-07	1.0378e-05	-4.20428e-05	178.64	-3.05847	2.3847
2	4.2	66	0.204	13.9125	0.0215484	3.7209	2.16327	16.26	-15.1673	-60.1386	-0.00602023	-0.00510476	1.14007e-05	0.106819	-0.128887	90.2902	9.199e-07	1.03893e-05	-4.20383e-05	178.697	-3.06084	2.3837
2	4.2	67	0.208	14.84	0.0107728	3.7577	2.21122	16.2354	-14.9014	-58.7483	-0.0060213	-0.00511837	1.14004e-05	0.106791	-0.129175	90.4306	9.19509e-07	1.04162e-05	-4.20277e-05	178.753	-3.06314	2.38273
2	4.2	68	0.212	15.7675	0.00229389	3.7896	2.26137	16.2272	-14.6334	-57.2689	-0.00602214	-0.00512963	1.14e-05	0.106767	-0.129414	90.5469	9.19043e-07	1.04483e-05	-4.20149e-05	178.807	-3.06538	2.38178
2	4.2	69	0.216	16.695	-0.00688989	3.81207	2.30201	16.2145	-14.4263	-55.7	-0.0060227	-0.00513732	1.13997e-05	0.10675	-0.129576	90.6262	9.18652e-07	1.04752e-05	-4.20043e-05	178.86	-3.06756	2.38086
2	4.2	70	0.22	17.6225	-0.0197798	3.82057	2.32141	16.1768	-14.3432	-54.0413	-0.0060229	-0.00514016	1.13995e-05	0.106744	-0.129636	90.6554	9.18488e-07	1.04865e-05	-4.19998e-05	178.911	-3.06967	2.37996
2	4.2	71	0.224	18.55	-0.0402588	3.81359	2.32461	16.0961	-14.6817	-52.1742	-0.00602045	-0.00511455	1.13993e-05	0.106787	-0.129092	90.3907	9.18347e-07	1.04961e-05	-4.19959e-05	178.961	-3.07172	2.37909
2	4.2	72	0.228	19.4775	-0.0663263	3.79693	2.32545	15.9859	-15.5188	-50.0988	-0.00601461	-0.00505348	1.13987e-05	0.106891	-0.127796	89.7593	9.1801e-07	1.05191e-05	-4.19866e-05	179.009	-3.07371	2.37825
2	4.2	73	0.232	20.405	-0.0921575	3.77704	2.32552	15.8735	-16.5868	-47.9932	-0.00600763	-0.00498059	1.1398e-05	0.107016	-0.126248	89.0056	9.17609e-07	1.05466e-05	-4.19756e-05	179.055	-3.07563	2.37743
2	4.2	74	0.236	21.3325	-0.111928	3.76039	2.32637	15.7862	-17.6181	-46.0354	-0.00600179	-0.00491953	1.13974e-05	0.10712	-0.124951	88.3742	9.17273e-07	1.05696e-05	-4.19663e-05	179.1	-3.07749	2.37664
2	4.2	75	0.24	22.26	-0.119812	3.7534	2.32956	15.751	-18.345	-44.4033	-0.00599934	-0.00489392	1.13972e-05	0.107163	-0.124407	88.1095	9.17132e-07	1.05793e-05	-4.19624e-05	179.144	-3.0793	2.37586
2	4.2	76	0.244	23.1875	-0.115701	3.75512	2.35784	15.8942	-18.6931	-43.2211	-0.00600241	-0.00492914	1.13969e-05	0.107097	-0.125154	88.4734	9.17012e-07	1.05874e-05	-4.19591e-05	179.186	-3.08104	2.37512
2	4.2	77	0.248	24.115	-0.105898	3.75921	2.42102	16.2357	-18.8407	-42.3702	-0.00600974	-0.00501314	1.13963e-05	0.106939	-0.126935	89.3413	9.16726e-07	1.06069e-05	-4.19511e-05	179.227	-3.08273	2.37439
2	4.2	78	0.252	25.0425	-0.0941979	3.7641	2.50132	16.6433	-18.8997	-41.6642	-0.0060185	-0.00511339	1.13955e-05	0.106751	-0.129061	90.3772	9.16386e-07	1.06301e-05	-4.19416e-05	179.266	-3.08436	2.37369
2	4.2	79	0.256	25.97	-0.084395	3.7682	2.58093	16.9848	-18.9817	-40.9169	-0.00602583	-0.00519739	1.13948e-05	0.106593	-0.130842	91.245	9.161e-07	1.06495e-05	-4.19337e-05	179.304	-3.08594	2.37302
2	4.2	80	0.26	26.8975	-0.0802841	3.76991	2.64205	17.128	-19.1986	-39.9419	-0.00602891	-0.00523261	1.13946e-05	0.106527	-0.131589	91.609	9.1598e-07	1.06577e-05	-4.19303e-05	179.341	-3.08746	2.37236
2	4.2	81	0.264	27.825	-0.0855227	3.76734	2.68104	17.0605	-19.6502	-38.6587	-0.00602845	-0.0052253	1.1395e-05	0.106544	-0.131435	91.5336	9.1588e-07	1.06645e-05	-4.19275e-05	179.376	-3.08895	2.37172
2	4.2	82	0.268	28.7525	-0.0980149	3.76024	2.70977	16.8688	-20.2619	-37.1916	-0.00602735	-0.00520787	1.1396e-05	0.106586	-0.131067	91.3539	9.15641e-07	1.06807e-05	-4.19208e-05	179.411	-3.0904	2.3711
2	4.2	83	0.272	29.68	-0.112925	3.74957	2.7337	16.5699	-20.884	-35.6613	-0.00602604	-0.00518707	1.13972e-05	0.106636	-0.130628	91.1393	9.15357e-07	1.07e-05	-4.19129e-05	179.445	-3.09178	2.3705
2	4.2	84	0.276	30.6075	-0.125417	3.73629	2.75828	16.1804	-21.3671	-34.1884	-0.00602494	-0.00516964	1.13982e-05	0.106677	-0.130259	90.9596	9.15118e-07	1.07162e-05	-4.19062e-05	179.476	-3.09308	2.36994
2	4.2	85	0.28	31.535	-0.130656	3.72132	2.78895	15.7171	-21.5613	-32.8938	-0.00602448	-0.00516233	1.13986e-05	0.106695	-0.130105	90.8842	9.15018e-07	1.0723e-05	-4.19034e-05	179.505	-3.09427	2.36942
2	4.2	86	0.284	32.4625	-0.123256	3.70635	2.82509	15.1923	-21.5397	-31.742	-0.00602485	-0.0051724	1.1397e-05	0.106664	-0.130317	90.988	9.14978e-07	1.07257e-05	-4.19022e-05	179.532	-3.09539	2.36894
2	4.2	87	0.288	33.39	-0.102164	3.69203	2.86228	14.6159	-21.4769	-30.6165	-0.00602583	-0.00520014	1.13927e-05	0.106579	-0.130899	91.2737	9.1487e-07	1.0733e-05	-4.18992e-05	179.558	-3.0965	2.36846
2	4.2	88	0.292	34.3175	-0.0690454	3.67783	2.90036	14.0009	-21.3762	-29.5166	-0.00602728	-0.00524182	1.13863e-05	0.106452	-0.131774	91.7029	9.1471e-07	1.07438e-05	-4.18947e-05	179.585	-3.09759	2.36799
2	4.2	89	0.296	35.245	-0.0255621	3.66324	2.93911	13.3604	-21.2407	-28.4414	-0.00602905	-0.00529371	1.13785e-05	0.106293	-0.132864	92.2373	9.14517e-07	1.07568e-05	-4.18892e-05	179.61	-3.09866	2.36752
2	4.2	90	0.3	36.1725	0.0266227	3.64771	2.97834	12.7073	-21.0736	-27.39	-0.00603096	-0.00535207	1.137e-05	0.106113	-0.134089	92.8384	9.14306e-07	1.07711e-05	-4.18832e-05	179.635	-3.0997	2.36707
2	4.2	91	0.304	37.1	0.0858455	3.63074	3.01788	12.0546	-20.8781	-26.3617	-0.00603288	-0.00541319	1.13616e-05	0.105925	-0.135372	93.4678	9.14096e-07	1.07853e-05	-4.18773e-05	179.66	-3.10071	2.36663
2	4.2	92	0.308	38.0275	0.150443	3.61177	3.05752	11.4153	-20.6573	-25.3557	-0.00603465	-0.00547333	1.13538e-05	0.105739	-0.136634	94.0872	9.13902e-07	1.07984e-05	-4.18718e-05	179.683	-3.10168	2.36621
2	4.2	93	0.312	38.955	0.218751	3.5903	3.09707	10.8023	-20.4146	-24.3711	-0.0060361	-0.00552877	1.13474e-05	0.105566	-0.137798	94.6582	9.13743e-07	1.08091e-05	-4.18673e-05	179.705	-3.10261	2.3658
2	4.2	94	0.316	39.8825	0.289108	3.56578	3.13634	10.2287	-20.1529	-23.407	-0.00603708	-0.00557578	1.1343e-05	0.105418	-0.138784	95.1423	9.13635e-07	1.08165e-05	-4.18642e-05	179.727	-3.1035	2.36542
2	4.2	95	0.32	40.81	0.35985	3.53769	3.17514	9.70746	-19.8756	-22.4627	-0.00603745	-0.00561063	1.13414e-05	0.105306	-0.139515	95.5012	9.13595e-07	1.08191e-05	-4.18631e-05	179.747	-3.10434	2.36505
2	4.2	96	0.324	41.7375	0.437497	3.50489	3.21707	9.25428	-19.5336	-21.542	-0.00603744	-0.00563303	1.13408e-05	0.105232	-0.139984	95.7318	9.13571e-07	1.08208e-05	-4.18624e-05	179.766	-3.10512	2.36471
2	4.2	97	0.328	42.665	0.527396	3.46729	3.26434	8.86446	-19.0964	-20.6476	-0.00603743	-0.00564668	1.1339e-05	0.105187	-0.14027	95.8724	9.13505e-07	1.08252e-05	-4.18605e-05	179.783	-3.10586	2.36439
2	4.2	98	0.332	43.5925	0.626127	3.42595	3.31465	8.52027	-18.5948	-19.7776	-0.00603739	-0.00565385	1.13364e-05	0.105161	-0.14042	95.9463	9.13408e-07	1.08317e-05	-4.18578e-05	179.8	-3.10655	2.36409
2	4.2	99	0.336	44.52	0.730263	3.38192	3.36569	8.20402	-18.0598	-18.93	-0.00603731	-0.00565681	1.13332e-05	0.105148	-0.140481	95.9767	9.1329e-07	1.08396e-05	-4.18544e-05	179.816	-3.10721	2.3638
2	4.2	100	0.34	45.4475	0.836383	3.33625	3.41518	7.89803	-17.5224	-18.1028	-0.00603718	-0.00565782	1.13297e-05	0.10514	-0.140502	95.987	9.13162e-07	1.08483e-05	-4.18508e-05	179.831	-3.10782	2.36353
2	4.2	101	0.344	46.375	0.941065	3.29001	3.46083	7.58457	-17.0133	-17.2938	-0.00603699	-0.00565913	1.13263e-05	0.105128	-0.140528	96.0006	9.13034e-07	1.08569e-05	-4.18471e-05	179.845	-3.10841	2.36328
2	4.2	102	0.348	47.3025	1.04088	3.24425	3.50032	7.24597	-16.5636	-16.5011	-0.00603672	-0.00566303	1.13231e-05	0.105104	-0.140608	96.0407	9.12916e-07	1.08648e-05	-4.18438e-05	179.858	-3.10896	2.36304
2	4.2	103	0.352	48.23	1.13242	3.20002	3.53138	6.86452	-16.2041	-15.7227	-0.00603637	-0.00567177	1.13204e-05	0.105061	-0.140788	96.1306	9.1282e-07	1.08713e-05	-4.1841e-05	179.87	-3.10948	2.36281
2	4.2	104	0.356	49.1575	1.21224	3.15838	3.55169	6.42252	-15.9657	-14.9565	-0.00603591	-0.00568762	1.13187e-05	0.10499	-0.141117	96.2938	9.12754e-07	1.08758e-05	-4.18391e-05	179.882	-3.10998	2.36259
2	4.2	105	0.36	50.085	1.27693	3.12038	3.55897	5.90228	-15.8794	-14.2005	-0.00603534	-0.00571285	1.1318e-05	0.104883	-0.141642	96.5534	9.1273e-07	1.08774e-05	-4.18384e-05	179.894	-3.11045	2.36238
2	4.2	106	0.364	51.0125	1.32795	3.08299	3.55331	5.23441	-15.953	-13.4708	-0.00603224	-0.00576173	1.13082e-05	0.104638	-0.142651	97.0582	9.12717e-07	1.08782e-05	-4.18381e-05	179.904	-3.11089	2.36219
2	4.2	107	0.368	51.94	1.36967	3.04343	3.53793	4.39871	-16.153	-12.7784	-0.00602491	-0.0058414	1.12816e-05	0.10419	-0.144287	97.8827	9.12683e-07	1.08805e-05	-4.18371e-05	179.914	-3.11128	2.36202
2	4.2	108	0.372	52.8675	1.403	3.00312	3.51527	3.4513	-16.4476	-12.1138	-0.00601442	-0.00594339	1.12423e-05	0.103593	-0.146378	98.9392	9.12633e-07	1.08838e-05	-4.18357e-05	179.922	-3.11164	2.36186
2	4.2	109	0.376	53.795	1.42888	2.96352	3.48776	2.44823	-16.8053	-11.4674	-0.00600185	-0.00605924	1.11947e-05	0.102902	-0.148751	100.14	9.12573e-07	1.08879e-05	-4.18339e-05	179.93	-3.11197	2.36172
2	4.2	110	0.38	54.7225	1.44823	2.92606	3.45781	1.4456	-17.1946	-10.8294	-0.00598827	-0.00618049	1.11428e-05	0.102169	-0.151233	101.396	9.12507e-07	1.08923e-05	-4.18321e-05	179.937	-3.11227	2.36158
2	4.2	111	0.384	55.65	1.46198	2.89218	3.42787	0.499508	-17.5839	-10.1904	-0.00597476	-0.00629868	1.10909e-05	0.10145	-0.153651	102.622	9.12441e-07	1.08967e-05	-4.18302e-05	179.944	-3.11255	2.36146
2	4.2	112	0.388	56.5775	1.47107	2.86332	3.40035	-0.333974	-17.9416	-9.54069	-0.00596238	-0.00640533	1.10433e-05	0.100796	-0.155832	103.727	9.12381e-07	1.09008e-05	-4.18284e-05	179.951	-3.11282	2.36134
2	4.2	113	0.392	57.505	1.47641	2.84093	3.37769	-0.998765	-18.2362	-8.87064	-0.00595221	-0.00649199	1.1004e-05	0.100263	-0.157604	104.626	9.12331e-07	1.09042e-05	-4.1827e-05	179.957	-3.11308	2.36123
2	4.2	114	0.396	58.4325	1.47893	2.82644	3.36231	-1.43876	-18.4362	-8.17068	-0.00594532	-0.00655019	1.09774e-05	0.0999036	-0.158794	105.23	9.12297e-07	1.09064e-05	-4.1826e-05	179.963	-3.11333	2.36112
2	4.2	115	0.4	59.36	1.47956	2.82128	3.35665	-1.59789	-18.5098	-7.43118	-0.00594278	-0.00657147	1.09676e-05	0.0997719	-0.159229	105.45	9.12285e-07	1.09073e-05	-4.18257e-05	179.969	-3.11359	2.36101
2	4.2	116	0.404	60.2875	1.46402	2.8356	3.41463	-1.5454	-18.4405	-6.61926	-0.00594636	-0.00655018	1.09789e-05	0.0999254	-0.158798	105.228	9.12273e-07	1.0908e-05	-4.18254e-05	179.975	-3.11382	2.36091
2	4.2	117	0.408	61.215	1.42206	2.87149	3.55522	-1.40799	-18.2447	-5.72371	-0.00595488	-0.00649942	1.10059e-05	0.100291	-0.157769	104.698	9.12246e-07	1.09098e-05	-4.18246e-05	179.979	-3.11399	2.36083
2	4.2	118	0.412	62.1425	1.36071	2.91837	3.72843	-1.21574	-17.941	-4.76732	-0.00596506	-0.00643883	1.10381e-05	0.100728	-0.156542	104.066	9.12214e-07	1.0912e-05	-4.18237e-05	179.982	-3.11413	2.36077
2	4.2	119	0.416	63.07	1.28695	2.96564	3.88423	-0.998737	-17.5476	-3.77292	-0.00597358	-0.00638806	1.10651e-05	0.101094	-0.155513	103.536	9.12187e-07	1.09138e-05	-4.18229e-05	179.985	-3.11424	2.36072
2	4.2	120	0.42	63.9975	1.20782	3.00273	3.97261	-0.78707	-17.083	-2.76335	-0.00597716	-0.00636677	1.10764e-05	0.101248	-0.155082	103.314	9.12176e-07	1.09145e-05	-4.18226e-05	179.987	-3.11436	2.36067
2	4.2	121	0.424	64.925	1.12026	3.02864	4.00352	-0.567483	-16.4511	-1.66502	-0.00597684	-0.0063689	1.10753e-05	0.101233	-0.155125	103.336	9.1217e-07	1.09149e-05	-4.18224e-05	179.99	-3.11446	2.36062
2	4.2	122	0.428	65.8525	1.01961	3.05043	4.02227	-0.319914	-15.6394	-0.462725	-0.00597607	-0.00637399	1.10728e-05	0.101198	-0.155228	103.389	9.12157e-07	1.09158e-05	-4.1822e-05	179.993	-3.11455	2.36057
2	4.2	123	0.432	66.78	0.910426	3.06958	4.0319	-0.0642532	-14.7923	0.733179	-0.00597516	-0.00638005	1.10698e-05	0.101157	-0.155352	103.452	9.1214e-07	1.0917e-05	-4.18215e-05	179.995	-3.11463	2.36053
2	4.2	124	0.436	67.7075	0.797254	3.08759	4.03545	0.179619	-14.0543	1.81236	-0.00597439	-0.00638513	1.10673e-05	0.101122	-0.155455	103.505	9.12126e-07	1.09179e-05	-4.18211e-05	179.996	-3.11469	2.36051
2	4.2	125	0.44	68.635	0.684647	3.10595	4.03596	0.391823	-13.5696	2.66447	-0.00597407	-0.00638727	1.10662e-05	0.101107	-0.155498	103.527	9.12121e-07	1.09183e-05	-4.1821e-05	179.997	-3.11475	2.3605
2	4.2	126	0.444	69.5625	0.563007	3.12646	4.02557	0.558135	-13.2869	3.33683	-0.00597805	-0.00638481	1.10804e-05	0.101221	-0.155448	103.502	9.12118e-07	1.09184e-05	-4.18209e-05	179.997	-3.1148	2.36049
2	4.2	127	0.448	70.49	0.424373	3.14925	3.99656	0.686987	-13.055	3.95487	-0.00598752	-0.00636758	1.11141e-05	0.101526	-0.155096	103.323	9.12113e-07	1.09187e-05	-4.18208e-05	179.997	-3.11484	2.36048
2	4.2	128	0.452	71.4175	0.275763	3.17326	3.95217	0.79246	-12.8691	4.52545	-0.00599884	-0.00632082	1.11543e-05	0.101968	-0.154141	102.838	9.12107e-07	1.09192e-05	-4.18206e-05	179.997	-3.11487	2.36046
2	4.2	129	0.456	72.345	0.124197	3.19747	3.89563	0.888634	-12.7241	5.05536	-0.00600832	-0.00622976	1.1188e-05	0.102492	-0.152281	101.894	9.12102e-07	1.09195e-05	-4.18204e-05	179.997	-3.11489	2.36044
2	4.2	130	0.46	73.2725	-0.0233062	3.22081	3.83016	0.989592	-12.6151	5.55145	-0.00601229	-0.00607964	1.12022e-05	0.103044	-0.149216	100.336	9.121e-07	1.09196e-05	-4.18204e-05	180	-3.11489	2.36043
2	4.2	131	0.464	74.2	-0.159731	3.24226	3.759	1.10942	-12.5371	6.02054	-0.00601064	-0.00580967	1.11992e-05	0.103763	-0.143639	97.5862	9.121e-07	1.09197e-05	-4.18204e-05	180	-3.1149	2.36043
2	4.2	132	0.468	75.1275	-0.278055	3.26075	3.6854	1.26219	-12.4851	6.46946	-0.00599903	-0.00540621	1.11922e-05	0.104685	-0.135205	93.4985	9.12099e-07	1.09197e-05	-4.18204e-05	180	-3.1149	2.36043
2	4.2	133	0.472	76.055	-0.371262	3.27526	3.61256	1.46198	-12.4541	6.90504	-0.00596752	-0.00492519	1.11839e-05	0.105601	-0.125042	88.5743	9.12098e-07	1.09198e-05	-4.18203e-05	180	-3.11491	2.36043
2	4.2	134	0.476	76.9825	-0.432334	3.28473	3.54374	1.7229	-12.4391	7.33412	-0.00590615	-0.00442252	1.11769e-05	0.106303	-0.114285	83.3147	9.12097e-07	1.09198e-05	-4.18203e-05	179.999	-3.11491	2.36043
2	4.2	135	0.48	77.91	-0.45425	3.28812	3.48217	2.059	-12.4353	7.7635	-0.00580499	-0.00395413	1.1174e-05	0.106584	-0.104062	78.2206	9.12097e-07	1.09198e-05	-4.18203e-05	179.999	-3.11491	2.36042
2	4.2	136	0.484	78.8375	-0.453476	3.25699	3.41713	2.67266	-12.9701	8.18319	-0.00561763	-0.00347191	1.09479e-05	0.105052	-0.0932459	72.7226	9.03866e-07	1.07885e-05	-4.19662e-05	176.964	-3.07676	2.35664
2	4.2	137	0.488	79.765	-0.451629	3.18275	3.34334	3.60629	-14.2457	8.55953	-0.00534179	-0.00293855	1.04087e-05	0.101262	-0.0810803	66.4867	8.84238e-07	1.04135e-05	-4.2352e-05	173.928	-2.97398	2.34243
2	4.2	138	0.492	80.6925	-0.449424	3.09414	3.27213	4.63394	-15.768	8.86385	-0.00503363	-0.00242626	9.76509e-06	0.0964215	-0.0692614	60.3671	8.60811e-07	9.82388e-06	-4.29e-05	170.893	-2.82408	2.31357
2	4.2	139	0.496	81.62	-0.447577	3.0199	3.21484	5.52972	-17.0435	9.06746	-0.00474934	-0.0020072	9.22588e-06	0.0917386	-0.0594846	55.2178	8.41184e-07	9.04837e-06	-4.35322e-05	167.858	-2.64456	2.26579
2	4.2	140	0.5	82.5475	-0.446803	2.98877	3.18279	6.06769	-17.5784	9.1417	-0.00454511	-0.00175357	8.99975e-06	0.0884212	-0.0534452	51.893	8.32952e-07	8.11582e-06	-4.41708e-05	164.822	-2.45293	2.19484
3	1.2	80	0.004	69.0658	-0.415837	1.73499	4.68303	-2.39386	-27.1858	13.3559	-0.00718632	-0.0123741	-8.57947e-06	-0.038915	-0.0237914	80.9632	1.58876e-07	7.0516e-05	-1.1867e-06	161.787	-1.08657	0.102021
3	1.2	81	0.008	69.7852	-0.458244	1.84522	4.6757	-1.91369	-27.1583	12.5864	-0.00718551	-0.0120633	-8.39997e-06	-0.0379237	-0.0237862	79.3489	2.03877e-07	7.03984e-05	-1.49275e-06	163.526	-1.11295	0.16004
3	1.2	82	0.012	70.5046	-0.548789	2.0712	4.65699	-0.768656	-27.0704	10.5692	-0.00717984	-0.0112637	-7.93656e-06	-0.0353747	-0.0237502	75.1891	3.11187e-07	7.01179e-05	-2.28752e-06	164.868	-1.1544	0.30533
3	1.2	83	0.016	71.224	-0.663702	2.35993	4.63182	0.597986	-26.9143	7.74197	-0.00716446	-0.0101749	-7.30184e-06	-0.0319053	-0.0236526	69.5086	4.39266e-07	6.97831e-05	-3.38595e-06	166.027	-1.19898	0.506265
3	1.2	84	0.02	71.9434	-0.779215	2.65841	4.60509	1.74302	-26.682	4.54191	-0.0071345	-0.00899661	-6.60843e-06	-0.0281528	-0.0234624	63.3319	5.46575e-07	6.95025e-05	-4.60299e-06	167.215	-1.23476	0.731221
3	1.2	85	0.024	72.6628	-0.871557	2.91365	4.58172	2.22319	-26.3657	1.40646	-0.00708512	-0.00792828	-5.96896e-06	-0.0247548	-0.0231488	57.684	5.91576e-07	6.93849e-05	-5.75357e-06	168.648	-1.24983	0.948572
3	1.2	86	0.028	73.3822	-0.9034	3.09708	4.55721	0.961479	-25.6112	-2.62158	-0.00679629	-0.00685629	-5.28632e-06	-0.0213606	-0.0221202	51.8501	7.28758e-07	6.89918e-05	-7.08744e-06	170.759	-1.25026	1.216
3	1.2	87	0.032	74.1016	-0.925667	3.24669	4.54272	-0.300244	-24.659	-7.34551	-0.00633591	-0.0057464	-4.55472e-06	-0.0178558	-0.0206042	45.6686	8.65941e-07	6.83255e-05	-8.57632e-06	173.165	-1.25032	1.52307
3	1.2	88	0.036	74.821	-1.03259	3.3587	4.61466	1.86006	-24.0961	-11.6407	-0.00587359	-0.00486047	-3.9504e-06	-0.0150659	-0.0190672	40.4715	9.92595e-07	6.7745e-05	-9.85054e-06	175.297	-1.22057	1.79547
3	1.2	89	0.04	75.5404	-1.0945	3.50169	4.73459	4.19872	-23.6039	-18.2724	-0.00566177	-0.00450473	-3.73839e-06	-0.0139475	-0.0183666	38.3182	1.09109e-06	6.71025e-05	-1.09185e-05	177.444	-1.176	2.03135
3	1.2	90	0.044	76.2598	-1.13519	3.58782	4.80998	5.56058	-23.3328	-24.2875	-0.00549591	-0.00425626	-3.52638e-06	-0.0131676	-0.0178201	36.7665	1.18958e-06	6.67265e-05	-1.17866e-05	178.673	-1.13397	2.22524
3	1.2	91	0.048	76.9792	-1.15046	3.55691	4.69656	5.54509	-24.5802	-27.9684	-0.00526159	-0.00392348	-3.3379e-06	-0.012124	-0.0170495	34.6498	1.22835e-06	6.65067e-05	-1.23265e-05	179.325	-1.10147	2.34801
3	1.2	92	0.052	77.6986	-1.15512	3.48041	4.461	5.43664	-27.1931	-30.8006	-0.0051213	-0.00373178	-3.14942e-06	-0.0115233	-0.0165886	33.4153	1.26713e-06	6.62868e-05	-1.25313e-05	179.977	-1.08581	2.39575
3	1.2	93	0.056	78.418	-1.16959	3.38268	4.2604	5.14227	-29.4769	-33.7104	-0.00524214	-0.00389399	-3.26695e-06	-0.0120315	-0.0169854	34.4668	1.26432e-06	6.63032e-05	-1.25045e-05	179.974	-1.0877	2.38955
3	1.2	94	0.06	79.1374	-1.22444	3.25142	4.19294	2.45659	-30.4426	-37.3487	-0.0054439	-0.00418477	-3.43673e-06	-0.0129436	-0.0176493	36.3071	1.25357e-06	6.63651e-05	-1.24017e-05	179.881	-1.09298	2.37341
3	1.2	95	0.064	79.8568	-1.26619	3.08668	4.1562	-0.0199204	-31.1052	-40.5737	-0.00557076	-0.0043693	-3.60651e-06	-0.0135225	-0.0180668	37.4713	1.24282e-06	6.6427e-05	-1.2299e-05	179.598	-1.10178	2.34225
3	1.2	96	0.068	80.5762	-1.19608	2.88875	4.07928	0.182301	-32.233	-42.8369	-0.00555884	-0.00435143	-3.59383e-06	-0.0134664	-0.0180275	37.3597	1.22918e-06	6.65018e-05	-1.21669e-05	179.214	-1.11496	2.29359
3	1.2	97	0.072	81.2956	-1.0289	2.65854	3.99336	0.670375	-33.5511	-44.8527	-0.00553044	-0.00430883	-3.56359e-06	-0.0133327	-0.0179339	37.0935	1.19666e-06	6.66802e-05	-1.18517e-05	178.808	-1.12937	2.24218
3	1.2	98	0.076	82.015	-0.829362	2.43985	3.90781	1.26643	-34.8063	-46.7519	-0.00549653	-0.00425797	-3.5275e-06	-0.0131731	-0.0178222	36.7757	1.15784e-06	6.6893e-05	-1.14755e-05	178.366	-1.14444	2.18633
3	1.2	99	0.08	82.7344	-0.662182	2.27652	3.83203	1.79259	-35.7451	-48.6654	-0.00546812	-0.00421537	-3.49726e-06	-0.0130393	-0.0177286	36.5095	1.12531e-06	6.70714e-05	-1.11603e-05	177.878	-1.1596	2.12436
3	1.2	100	0.084	83.4538	-0.592075	2.21234	3.7754	2.07096	-36.1143	-50.724	-0.00545621	-0.0041975	-3.48458e-06	-0.0129832	-0.0176894	36.3978	1.11167e-06	6.71462e-05	-1.10281e-05	177.329	-1.17425	2.05457
3	1.2	101	0.088	84.1732	-0.598051	2.23246	3.74186	2.13316	-35.5191	-52.9798	-0.00555946	-0.00439248	-3.65316e-06	-0.0135972	-0.0180324	37.5467	1.08984e-06	6.72524e-05	-1.08848e-05	176.707	-1.18929	1.97537
3	1.2	102	0.092	84.8926	-0.614312	2.28709	3.72455	2.14966	-34.0104	-55.3455	-0.005815	-0.00487767	-4.05516e-06	-0.0151249	-0.0188817	40.4027	1.03777e-06	6.75056e-05	-1.05145e-05	176.022	-1.2051	1.88787
3	1.2	103	0.096	85.612	-0.638358	2.36764	3.71669	2.15092	-32.0037	-57.7431	-0.00614155	-0.00550344	-4.53496e-06	-0.0170955	-0.0199673	44.08	9.75628e-07	6.78079e-05	-1.0007e-05	175.291	-1.22036	1.79449
3	1.2	104	0.1	86.3314	-0.667688	2.46552	3.7115	2.16743	-29.9144	-60.0943	-0.0064578	-0.0061202	-4.93695e-06	-0.0190382	-0.0210196	47.6928	9.23562e-07	6.80611e-05	-9.45172e-06	174.532	-1.23374	1.69762
3	1.2	105	0.104	87.0508	-0.699803	2.57214	3.7022	2.22962	-28.1582	-62.3208	-0.00668247	-0.00657831	-5.10553e-06	-0.0204818	-0.0217685	50.3551	9.01728e-07	6.81673e-05	-8.93844e-06	173.765	-1.2439	1.59965
3	1.2	106	0.108	87.7702	-0.739284	2.70741	3.68694	3.12789	-26.6062	-64.3291	-0.00680031	-0.00684371	-5.16636e-06	-0.0213191	-0.0221631	51.8697	8.75981e-07	6.82713e-05	-8.45963e-06	172.975	-1.25051	1.49893
3	1.2	107	0.112	88.4896	-0.787798	2.87706	3.67023	5.1323	-24.9814	-66.1712	-0.00686554	-0.00701615	-5.31142e-06	-0.0218639	-0.0223834	52.827	8.14584e-07	6.85192e-05	-7.95551e-06	172.153	-1.25452	1.39387
3	1.2	108	0.116	89.209	-0.838472	3.05122	3.65486	7.49269	-23.4771	-67.9877	-0.00690099	-0.00714672	-5.48454e-06	-0.0222774	-0.0225058	53.5232	7.41304e-07	6.88151e-05	-7.43735e-06	171.315	-1.25658	1.28694
3	1.2	109	0.12	89.9284	-0.884433	3.20003	3.6436	9.459	-22.2861	-69.919	-0.00692952	-0.00728653	-5.6296e-06	-0.0227209	-0.0226067	54.2543	6.79908e-07	6.9063e-05	-6.9164e-06	170.48	-1.25734	1.18063
3	1.2	110	0.124	90.6478	-0.918807	3.29364	3.63923	10.2811	-21.6017	-72.1059	-0.00697397	-0.00748667	-5.69043e-06	-0.0233555	-0.0227628	55.3163	6.54161e-07	6.91669e-05	-6.40391e-06	169.666	-1.25744	1.07743
3	1.2	111	0.128	91.3672	-0.943466	3.33845	3.64791	10.2077	-21.2849	-74.5648	-0.00703574	-0.00775075	-5.7914e-06	-0.0241926	-0.0229786	56.728	6.29197e-07	6.9246e-05	-5.89732e-06	168.872	-1.25395	0.97718
3	1.2	112	0.132	92.0866	-0.964759	3.36468	3.67029	10.0185	-21.0579	-77.1814	-0.0070996	-0.00804471	-6.03219e-06	-0.0251247	-0.0232033	58.2918	5.6967e-07	6.94347e-05	-5.38913e-06	168.086	-1.2449	0.878224
3	1.2	113	0.136	92.806	-0.982531	3.37826	3.70089	9.75971	-20.9057	-79.8992	-0.00716345	-0.00836313	-6.31959e-06	-0.0261348	-0.0234297	59.98	4.9862e-07	6.96599e-05	-4.88316e-06	167.309	-1.23239	0.780794
3	1.2	114	0.14	93.5254	-0.996624	3.38512	3.73423	9.47776	-20.8134	-82.662	-0.0072252	-0.0087006	-6.56038e-06	-0.0272058	-0.0236508	61.7643	4.39092e-07	6.98485e-05	-4.38328e-06	166.545	-1.21855	0.685125
3	1.2	115	0.144	94.2448	-1.00688	3.39115	3.76483	9.21899	-20.766	-85.4135	-0.00728275	-0.00905172	-6.66136e-06	-0.0283206	-0.0238594	63.6169	4.14129e-07	6.99276e-05	-3.89331e-06	165.796	-1.20549	0.591449
3	1.2	116	0.148	94.9642	-1.01315	3.40229	3.78721	9.02973	-20.7485	-88.0975	-0.00733368	-0.00949535	-6.93887e-06	-0.0297308	-0.0240616	65.9371	3.72691e-07	7.00355e-05	-3.33457e-06	165.098	-1.19057	0.50485
3	1.2	117	0.152	95.6836	-1.01528	3.42445	3.79589	8.95634	-20.746	-90.6575	-0.00735725	-0.00997967	-7.21638e-06	-0.0312723	-0.0241637	68.4581	3.31253e-07	7.01433e-05	-3.01771e-06	164.483	-1.17375	0.429212
3	1.2	118	0.156	96.403	-0.980427	3.48055	3.77555	11.351	-21.8448	-93.3776	-0.0073531	-0.0104405	-7.40554e-06	-0.0327408	-0.0241671	70.8567	3.05379e-07	7.02025e-05	-2.74322e-06	163.913	-1.1575	0.359493
3	1.2	119	0.16	97.1224	-0.909384	3.55369	3.73779	15.7984	-23.8853	-95.8318	-0.00734354	-0.0108896	-7.75684e-06	-0.0341729	-0.0241734	73.1925	2.57326e-07	7.03124e-05	-2.23345e-06	163.38	-1.14129	0.294411
3	1.2	120	0.164	97.8418	-0.852425	3.59003	3.71745	18.193	-24.984	-96.899	-0.00733289	-0.0112394	-7.94599e-06	-0.0352885	-0.0241767	75.0123	2.31452e-07	7.03715e-05	-1.95896e-06	162.916	-1.12667	0.238029
3	1.2	121	0.168	98.5612	-0.830318	3.56098	3.7575	18.1112	-24.6264	-96.8786	-0.00732061	-0.0114464	-7.99961e-06	-0.035949	-0.0241553	76.0913	2.1586e-07	7.04029e-05	-1.79308e-06	162.538	-1.114	0.192281
3	1.2	122	0.172	99.2806	-0.822295	3.48124	3.83188	17.9592	-23.9623	-96.736	-0.00730723	-0.0115541	-8.09919e-06	-0.0362931	-0.0241155	76.6544	1.86902e-07	7.04612e-05	-1.485e-06	162.23	-1.10291	0.155232
3	1.2	123	0.176	0	-0.816318	3.36189	3.87192	17.8774	-23.6048	-96.3488	-0.00729868	-0.0116054	-8.15281e-06	-0.0364573	-0.0240941	76.9235	1.7131e-07	7.04926e-05	-1.31911e-06	161.98	-1.09378	0.125136
3	1.2	124	0.18	0.7194	-0.812987	3.10346	3.86177	18.0921	-24.745	-95.4136	-0.00729624	-0.0116273	-8.15983e-06	-0.0365271	-0.0240905	77.0378	1.65093e-07	7.05043e-05	-1.25291e-06	161.827	-1.08817	0.106778
3	1.2	125	0.184	1.4388	-0.807598	2.91276	3.85161	18.4087	-26.2159	-93.8585	-0.00729589	-0.0116304	-8.16684e-06	-0.0365371	-0.024087	77.0542	1.58876e-07	7.0516e-05	-1.1867e-06	161.787	-1.08657	0.102021
3	1.2	126	0.188	2.1582	-0.795678	2.91316	3.85423	18.6324	-26.7797	-91.9767	-0.00729597	-0.0116297	-8.16125e-06	-0.0365347	-0.0240897	77.0502	1.58876e-07	7.0516e-05	-1.1867e-06	161.787	-1.08657	0.102021
3	1.2	127	0.192	2.8776	-0.784099	2.91594	3.8605	18.8709	-27.1945	-89.9596	-0.00729655	-0.0116243	-8.14792e-06	-0.0365176	-0.0240962	77.0222	1.58876e-07	7.0516e-05	-1.1867e-06	161.787	-1.08657	0.102021
3	1.2	128	0.196	3.597	-0.769888	2.92351	3.86798	19.0872	-27.5291	-87.8793	-0.00729813	-0.0116098	-8.132e-06	-0.0364711	-0.0241039	76.9462	1.58876e-07	7.0516e-05	-1.1867e-06	161.787	-1.08657	0.102021
3	1.2	129	0.2	4.3164	-0.750074	2.93823	3.87424	19.2442	-27.8525	-85.8085	-0.00730119	-0.0115815	-8.11867e-06	-0.0363807	-0.0241104	76.7981	1.58876e-07	7.0516e-05	-1.1867e-06	161.787	-1.08657	0.102021
3	1.2	130	0.204	5.0358	-0.721683	2.96251	3.87687	19.3047	-28.2334	-83.8194	-0.00730624	-0.0115348	-8.11308e-06	-0.0362316	-0.0241131	76.5541	1.58876e-07	7.0516e-05	-1.1867e-06	161.787	-1.08657	0.102021
3	1.2	131	0.208	5.7552	-0.674052	3.00857	3.86592	19.0088	-28.6697	-81.917	-0.00731624	-0.0114126	-8.05412e-06	-0.0358417	-0.0241249	75.917	1.58876e-07	7.0516e-05	-1.1867e-06	161.787	-1.08657	0.102021
3	1.2	132	0.212	6.4746	-0.609163	3.07625	3.83808	18.2735	-29.1154	-80.0532	-0.0073311	-0.0111975	-7.91354e-06	-0.0351552	-0.0241529	74.7962	1.58876e-07	7.0516e-05	-1.1867e-06	161.787	-1.08657	0.102021
3	1.2	133	0.216	7.194	-0.543011	3.14934	3.80083	17.3274	-29.5738	-78.2204	-0.00734676	-0.0109444	-7.74576e-06	-0.0343474	-0.0241865	73.4774	1.58876e-07	7.0516e-05	-1.1867e-06	161.787	-1.08657	0.102021
3	1.2	134	0.22	7.9134	-0.49159	3.21165	3.76167	16.399	-30.0485	-76.411	-0.00735914	-0.010708	-7.60518e-06	-0.0335932	-0.0242145	72.2465	1.58876e-07	7.0516e-05	-1.1867e-06	161.787	-1.08657	0.102021
3	1.2	135	0.224	8.6328	-0.470896	3.24697	3.7281	15.7169	-30.5427	-74.6175	-0.00736417	-0.0105433	-7.54623e-06	-0.033068	-0.0242263	71.3891	1.58876e-07	7.0516e-05	-1.1867e-06	161.787	-1.08657	0.102021
3	1.2	136	0.228	9.3522	-0.473348	3.26064	3.69747	15.2913	-31.0993	-72.8614	-0.00736408	-0.0104415	-7.53529e-06	-0.0327435	-0.024224	70.8593	1.58876e-07	7.0516e-05	-1.1867e-06	161.787	-1.08657	0.102021
3	1.2	137	0.232	10.0716	-0.48016	3.2695	3.66324	14.9598	-31.7369	-71.1558	-0.0073638	-0.0103553	-7.5056e-06	-0.0324686	-0.0242176	70.4107	1.58876e-07	7.0516e-05	-1.1867e-06	161.787	-1.08657	0.102021
3	1.2	138	0.236	10.791	-0.490511	3.27468	3.62701	14.6922	-32.4228	-69.4813	-0.00736331	-0.0102817	-7.46186e-06	-0.0322342	-0.0242082	70.0281	1.58876e-07	7.0516e-05	-1.1867e-06	161.787	-1.08657	0.102021
3	1.2	139	0.24	11.5104	-0.503584	3.27729	3.59039	14.4581	-33.124	-67.8186	-0.0073626	-0.0102179	-7.40874e-06	-0.0320308	-0.0241967	69.6962	1.58876e-07	7.0516e-05	-1.1867e-06	161.787	-1.08657	0.102021
3	1.2	140	0.244	12.2298	-0.518559	3.27845	3.55499	14.2273	-33.8076	-66.1482	-0.00736166	-0.0101609	-7.35093e-06	-0.0318493	-0.0241843	69.4001	1.58876e-07	7.0516e-05	-1.1867e-06	161.787	-1.08657	0.102021
3	1.2	141	0.248	12.9492	-0.534618	3.27929	3.52241	13.9696	-34.4406	-64.4506	-0.00736046	-0.0101079	-7.29312e-06	-0.0316804	-0.0241719	69.1244	1.58876e-07	7.0516e-05	-1.1867e-06	161.787	-1.08657	0.102021
3	1.2	142	0.252	13.6686	-0.550941	3.28092	3.49428	13.6546	-34.9903	-62.7064	-0.007359	-0.0100559	-7.24e-06	-0.0315148	-0.0241605	68.854	1.58876e-07	7.0516e-05	-1.1867e-06	161.787	-1.08657	0.102021
3	1.2	143	0.256	14.388	-0.566711	3.28447	3.47219	13.2521	-35.4236	-60.8962	-0.00735726	-0.0100019	-7.19626e-06	-0.0313432	-0.0241511	68.5738	1.58876e-07	7.0516e-05	-1.1867e-06	161.787	-1.08657	0.102021
3	1.2	144	0.26	15.1074	-0.581106	3.29105	3.45775	12.7318	-35.7077	-59.0004	-0.00735522	-0.00994325	-7.16657e-06	-0.0311564	-0.0241447	68.2686	1.58876e-07	7.0516e-05	-1.1867e-06	161.787	-1.08657	0.102021
3	1.2	145	0.264	15.8268	-0.59331	3.30178	3.45259	12.0635	-35.8097	-56.9997	-0.00735287	-0.00987687	-7.15563e-06	-0.030945	-0.0241423	67.9232	1.58876e-07	7.0516e-05	-1.1867e-06	161.787	-1.08657	0.102021
3	1.2	146	0.268	16.5462	-0.604416	3.31855	3.45486	10.8413	-35.4741	-54.7054	-0.00734931	-0.00979978	-7.13078e-06	-0.0306996	-0.0241306	67.5219	1.58876e-07	7.0516e-05	-1.1867e-06	161.787	-1.08657	0.102021
3	1.2	147	0.272	17.2656	-0.61523	3.34199	3.46471	8.99432	-34.6129	-52.0574	-0.00734415	-0.00971497	-7.0715e-06	-0.0304297	-0.0241026	67.0801	1.58876e-07	7.0516e-05	-1.1867e-06	161.787	-1.08657	0.102021
3	1.2	148	0.276	17.985	-0.624503	3.37134	3.4867	6.99521	-33.4443	-49.2289	-0.00733813	-0.00962856	-7.00075e-06	-0.0301548	-0.0240692	66.6299	1.58876e-07	7.0516e-05	-1.1867e-06	161.787	-1.08657	0.102021
3	1.2	149	0.28	18.7044	-0.630983	3.40583	3.52539	5.31639	-32.1867	-46.3929	-0.00733202	-0.00954666	-6.94148e-06	-0.0298942	-0.0240413	66.203	1.58876e-07	7.0516e-05	-1.1867e-06	161.787	-1.08657	0.102021
3	1.2	150	0.284	19.4238	-0.633421	3.44468	3.58534	4.4304	-31.0585	-43.7228	-0.00732655	-0.00947538	-6.91662e-06	-0.0296675	-0.0240295	65.8313	1.58876e-07	7.0516e-05	-1.1867e-06	161.787	-1.08657	0.102021
3	1.2	151	0.288	20.1432	-0.610228	3.49832	3.67314	4.18329	-30.1034	-41.2069	-0.00732108	-0.00940973	-6.90176e-06	-0.0294587	-0.0240203	65.4888	1.58876e-07	7.0516e-05	-1.1867e-06	161.787	-1.08657	0.102021
3	1.2	152	0.292	20.8626	-0.554921	3.56727	3.78576	4.06546	-29.1759	-38.7298	-0.0073151	-0.00934564	-6.86632e-06	-0.0292549	-0.0239982	65.1541	1.58876e-07	7.0516e-05	-1.1867e-06	161.787	-1.08657	0.102021
3	1.2	153	0.296	21.582	-0.48891	3.63588	3.9133	4.01584	-28.2103	-36.3088	-0.00730959	-0.00929059	-6.82402e-06	-0.0290798	-0.0239719	64.8665	1.58876e-07	7.0516e-05	-1.1867e-06	161.787	-1.08657	0.102021
3	1.2	154	0.3	22.3014	-0.433603	3.68852	4.04586	3.97334	-27.1406	-33.9615	-0.00730556	-0.00925207	-6.78858e-06	-0.0289574	-0.0239498	64.6652	1.58876e-07	7.0516e-05	-1.1867e-06	161.787	-1.08657	0.102021
3	1.2	155	0.304	23.0208	-0.41041	3.70954	4.17355	3.87689	-25.9012	-31.705	-0.007304	-0.00923756	-6.77372e-06	-0.0289113	-0.0239406	64.5894	1.58876e-07	7.0516e-05	-1.1867e-06	161.787	-1.08657	0.102021
3	1.2	156	0.308	23.7402	-0.456385	3.6559	4.29831	3.74608	-24.2319	-29.5026	-0.00730809	-0.00928269	-6.81307e-06	-0.0290548	-0.0239568	64.8249	1.58876e-07	7.0516e-05	-1.1867e-06	161.787	-1.08657	0.102021
3	1.2	157	0.312	24.4596	-0.570588	3.528	4.42674	3.62163	-22.1768	-27.3427	-0.00731821	-0.00939828	-6.9069e-06	-0.0294224	-0.0239974	65.428	1.58876e-07	7.0516e-05	-1.1867e-06	161.787	-1.08657	0.102021
3	1.2	158	0.316	25.179	-0.717433	3.37533	4.55592	3.47415	-20.1256	-25.2805	-0.00733114	-0.00955464	-7.0189e-06	-0.0299197	-0.0240499	66.2436	1.58876e-07	7.0516e-05	-1.1867e-06	161.787	-1.08657	0.102021
3	1.2	159	0.32	25.8984	-0.861332	3.24743	4.68295	3.27427	-18.4684	-23.3715	-0.00734367	-0.00972207	-7.11274e-06	-0.0304524	-0.0241019	67.1167	1.58876e-07	7.0516e-05	-1.1867e-06	161.787	-1.08657	0.102021
3	1.2	160	0.324	26.6178	-0.966698	3.19379	4.8049	2.99259	-17.5951	-21.671	-0.00735259	-0.00987088	-7.15209e-06	-0.0309259	-0.024141	67.892	1.58876e-07	7.0516e-05	-1.1867e-06	161.787	-1.08657	0.102021
3	1.2	161	0.328	27.3372	-1.02822	3.19509	4.92738	2.58802	-17.3422	-20.1797	-0.00735766	-0.0100033	-7.19249e-06	-0.0313474	-0.0241681	68.581	1.58876e-07	7.0516e-05	-1.1867e-06	161.787	-1.08657	0.102021
3	1.2	162	0.332	28.0566	-1.06963	3.19818	5.05233	2.08014	-17.2347	-18.8606	-0.00736105	-0.010139	-7.28882e-06	-0.0317797	-0.0241915	69.287	1.58876e-07	7.0516e-05	-1.1867e-06	161.787	-1.08657	0.102021
3	1.2	163	0.336	28.776	-1.09889	3.20187	5.17134	1.53062	-17.1951	-17.7127	-0.00736307	-0.0102748	-7.4038e-06	-0.0322124	-0.0242098	69.9931	1.58876e-07	7.0516e-05	-1.1867e-06	161.787	-1.08657	0.102021
3	1.2	164	0.34	29.4954	-1.12396	3.20496	5.27604	1.00109	-17.1459	-16.7352	-0.00736404	-0.0104074	-7.50014e-06	-0.0326349	-0.0242217	70.6824	1.58876e-07	7.0516e-05	-1.1867e-06	161.787	-1.08657	0.102021
3	1.2	165	0.344	30.2148	-1.1528	3.20626	5.35804	0.553222	-17.0093	-15.9271	-0.0073643	-0.0105335	-7.54054e-06	-0.0330367	-0.024226	71.3381	1.58876e-07	7.0516e-05	-1.1867e-06	161.787	-1.08657	0.102021
3	1.2	166	0.348	30.9342	-1.18953	3.15588	5.41448	0.255954	-16.7583	-15.4519	-0.00736213	-0.0106691	-7.57375e-06	-0.0334691	-0.0242232	72.0436	1.58876e-07	7.0516e-05	-1.1867e-06	161.787	-1.08657	0.102021
3	1.2	167	0.352	31.6536	-1.22884	3.03427	5.45098	0.0681789	-16.4446	-15.3104	-0.00735695	-0.0108165	-7.65296e-06	-0.033939	-0.0242167	72.8102	1.58876e-07	7.0516e-05	-1.1867e-06	161.787	-1.08657	0.102021
3	1.2	168	0.356	32.373	-1.26456	2.88579	5.47178	-0.11351	-16.1089	-15.2571	-0.00735078	-0.0109515	-7.7475e-06	-0.0343696	-0.0242088	73.5126	1.58876e-07	7.0516e-05	-1.1867e-06	161.787	-1.08657	0.102021
3	1.2	169	0.36	33.0924	-1.29051	2.75473	5.48114	-0.392525	-15.7921	-15.0466	-0.0073456	-0.0110501	-7.82671e-06	-0.0346842	-0.0242022	74.0259	1.58876e-07	7.0516e-05	-1.1867e-06	161.787	-1.08657	0.102021
3	1.2	170	0.364	33.8118	-1.30054	2.68544	5.48332	-0.872283	-15.535	-14.4335	-0.00734343	-0.0110883	-7.85993e-06	-0.0348062	-0.0241995	74.2248	1.58876e-07	7.0516e-05	-1.1867e-06	161.787	-1.08657	0.102021
3	1.2	171	0.368	34.5312	-1.27029	2.66622	5.47651	-1.58832	-15.3136	-13.4221	-0.00734519	-0.0109904	-7.80325e-06	-0.0344941	-0.0241987	73.7156	1.58876e-07	7.0516e-05	-1.1867e-06	161.787	-1.08657	0.102021
3	1.2	172	0.372	35.2506	-1.1868	2.65456	5.45752	-2.46948	-15.0817	-12.2149	-0.00734947	-0.010757	-7.66809e-06	-0.0337499	-0.0241968	72.5014	1.58876e-07	7.0516e-05	-1.1867e-06	161.787	-1.08657	0.102021
3	1.2	173	0.376	35.97	-1.06094	2.64857	5.42851	-3.45912	-14.8474	-10.864	-0.00735476	-0.0104784	-7.50677e-06	-0.0328617	-0.0241945	71.0523	1.58876e-07	7.0516e-05	-1.1867e-06	161.787	-1.08657	0.102021
3	1.2	174	0.38	36.6894	-0.903597	2.64637	5.39164	-4.50059	-14.6185	-9.42157	-0.00735954	-0.010245	-7.37161e-06	-0.0321175	-0.0241927	69.8381	1.58876e-07	7.0516e-05	-1.1867e-06	161.787	-1.08657	0.102021
3	1.2	175	0.384	37.4088	-0.725651	2.64605	5.34907	-5.53724	-14.4031	-7.93981	-0.00736231	-0.0101471	-7.31493e-06	-0.0318054	-0.0241919	69.329	1.58876e-07	7.0516e-05	-1.1867e-06	161.787	-1.08657	0.102021
3	1.2	176	0.388	38.1282	-0.537979	2.64574	5.30297	-6.51244	-14.2091	-6.47084	-0.00736334	-0.0101481	-7.3224e-06	-0.0318086	-0.0241935	69.3341	1.58876e-07	7.0516e-05	-1.1867e-06	161.787	-1.08657	0.102021
3	1.2	177	0.392	38.8476	-0.351463	2.64353	5.25548	-7.36953	-14.0443	-5.06683	-0.00736396	-0.0101549	-7.34021e-06	-0.0318304	-0.0241973	69.3697	1.58876e-07	7.0516e-05	-1.1867e-06	161.787	-1.08657	0.102021
3	1.2	178	0.396	39.567	-0.176983	2.63754	5.20877	-8.05187	-13.9168	-3.77991	-0.00736428	-0.0101736	-7.36148e-06	-0.0318898	-0.0242019	69.4666	1.58876e-07	7.0516e-05	-1.1867e-06	161.787	-1.08657	0.102021
3	1.2	179	0.4	40.2864	-0.0254151	2.62588	5.165	-8.50281	-13.8344	-2.66224	-0.00736439	-0.0102098	-7.37929e-06	-0.0320053	-0.0242058	69.6553	1.58876e-07	7.0516e-05	-1.1867e-06	161.787	-1.08657	0.102021
3	1.2	180	0.404	41.0058	0.0923562	2.60666	5.12634	-8.66572	-13.8052	-1.76598	-0.00736441	-0.0102697	-7.38676e-06	-0.0321959	-0.0242074	69.9663	1.58876e-07	7.0516e-05	-1.1867e-06	161.787	-1.08657	0.102021
3	1.2	181	0.408	41.7252	0.183004	2.56225	5.09067	-8.63954	-13.9975	-1.06827	-0.00736303	-0.0104048	-7.46113e-06	-0.0326264	-0.0242067	70.6679	1.58876e-07	7.0516e-05	-1.1867e-06	161.787	-1.08657	0.102021
3	1.2	182	0.412	42.4446	0.261519	2.48217	5.05461	-8.56268	-14.5285	-0.502333	-0.00735802	-0.0106365	-7.63847e-06	-0.0333653	-0.0242017	71.8718	1.58876e-07	7.0516e-05	-1.1867e-06	161.787	-1.08657	0.102021
3	1.2	183	0.416	43.164	0.329496	2.37521	5.01835	-8.43769	-15.3297	-0.0544314	-0.00734809	-0.0109252	-7.85013e-06	-0.0342861	-0.0241881	73.3732	1.58876e-07	7.0516e-05	-1.1867e-06	161.787	-1.08657	0.102021
3	1.2	184	0.42	43.8834	0.388531	2.25018	4.98208	-8.2671	-16.3326	0.289175	-0.00733194	-0.0112312	-8.02747e-06	-0.0352625	-0.0241617	74.9674	1.58876e-07	7.0516e-05	-1.1867e-06	161.787	-1.08657	0.102021
3	1.2	185	0.424	44.6028	0.440224	2.11588	4.94601	-8.05342	-17.4687	0.542229	-0.00730829	-0.0115148	-8.10184e-06	-0.0361679	-0.0241182	76.4498	1.58876e-07	7.0516e-05	-1.1867e-06	161.787	-1.08657	0.102021
3	1.2	186	0.428	45.3222	0.486169	1.98112	4.91032	-7.7992	-18.6695	0.718462	-0.00727769	-0.0117767	-8.17905e-06	-0.0370045	-0.0240501	77.8216	1.58876e-07	7.0516e-05	-1.1867e-06	161.787	-1.08657	0.102021
3	1.2	187	0.432	46.0416	0.527965	1.85468	4.87521	-7.50698	-19.8663	0.831616	-0.007241	-0.0120433	-8.36318e-06	-0.0378566	-0.0239537	79.2192	1.58876e-07	7.0516e-05	-1.1867e-06	161.787	-1.08657	0.102021
3	1.2	188	0.436	46.761	0.567208	1.74538	4.84089	-7.17927	-20.9907	0.895431	-0.00719738	-0.0123135	-8.58295e-06	-0.0387211	-0.0238302	80.6409	1.58876e-07	7.0516e-05	-1.1867e-06	161.787	-1.08657	0.102021
3	1.2	189	0.44	47.4804	0.605494	1.66202	4.80754	-6.81862	-21.9741	0.923645	-0.00714602	-0.0125865	-8.76708e-06	-0.0395947	-0.0236809	82.0847	1.58876e-07	7.0516e-05	-1.1867e-06	161.787	-1.08657	0.102021
3	1.2	190	0.444	48.1998	0.64442	1.61341	4.77537	-6.42756	-22.7481	0.929997	-0.00708608	-0.0128612	-8.8443e-06	-0.0404744	-0.023507	83.5488	1.58876e-07	7.0516e-05	-1.1867e-06	161.787	-1.08657	0.102021
3	1.2	191	0.448	48.9192	0.68338	1.59037	4.74202	-5.98348	-23.376	0.854278	-0.00701385	-0.0131464	-8.92115e-06	-0.0413885	-0.0232974	85.0812	1.58876e-07	7.0516e-05	-1.1867e-06	161.787	-1.08657	0.102021
3	1.2	192	0.452	49.6386	0.720378	1.57641	4.70597	-5.4712	-23.964	0.64876	-0.00692988	-0.0134428	-9.10441e-06	-0.042339	-0.0230511	86.6832	1.58876e-07	7.0516e-05	-1.1867e-06	161.787	-1.08657	0.102021
3	1.2	193	0.456	50.358	0.754934	1.56923	4.66868	-4.90438	-24.5082	0.345888	-0.00683974	-0.0137372	-9.32314e-06	-0.0432836	-0.0227851	88.2828	1.58537e-07	7.05214e-05	-1.22442e-06	161.807	-1.08658	0.102209
3	1.2	194	0.46	51.0774	0.786564	1.56659	4.63163	-4.2967	-25.0041	-0.0218764	-0.006749	-0.0140163	-9.50639e-06	-0.0441796	-0.022516	89.8079	1.57906e-07	7.05312e-05	-1.29447e-06	161.879	-1.08663	0.102902
3	1.2	195	0.464	51.7968	0.814788	1.56621	4.59627	-3.66178	-25.4476	-0.422099	-0.00666323	-0.0142671	-9.58324e-06	-0.0449849	-0.0222607	91.1867	1.57567e-07	7.05366e-05	-1.3322e-06	162.023	-1.08671	0.104291
3	1.2	196	0.468	52.5162	0.839123	1.56583	4.56405	-3.01332	-25.8346	-0.822322	-0.00658931	-0.0144779	-9.631e-06	-0.0456621	-0.0220403	92.3473	1.56835e-07	7.05469e-05	-1.41324e-06	162.215	-1.08683	0.10614
3	1.2	197	0.472	53.2356	0.859088	1.56319	4.53645	-2.36498	-26.1607	-1.19009	-0.00652351	-0.0146577	-9.74486e-06	-0.0462397	-0.0218436	93.3375	1.55089e-07	7.05716e-05	-1.6065e-06	162.425	-1.08698	0.108162
3	1.2	198	0.476	53.955	0.874201	1.55602	4.51493	-1.7304	-26.4219	-1.49296	-0.00645554	-0.0148236	-9.88077e-06	-0.0467733	-0.021639	94.2653	1.53006e-07	7.0601e-05	-1.83717e-06	162.665	-1.08713	0.110473
3	1.2	199	0.48	54.6744	0.88398	1.54205	4.50094	-1.12324	-26.6138	-1.69848	-0.00637507	-0.0149928	-9.99463e-06	-0.0473183	-0.0213947	95.2385	1.51261e-07	7.06257e-05	-2.03043e-06	162.947	-1.08726	0.113192
3	1.2	200	0.484	55.3938	0.887942	1.51902	4.49596	-0.557203	-26.7323	-1.77419	-0.00627182	-0.0151826	-1.00424e-05	-0.0479305	-0.0210793	96.3649	1.50529e-07	7.06361e-05	-2.11147e-06	163.284	-1.08732	0.116435
3	1.2	201	0.488	56.1132	0.88875	1.48093	4.49826	0.0195335	-26.8049	-1.77356	-0.00614797	-0.0153945	-1.00705e-05	-0.0486147	-0.0206999	97.646	1.49852e-07	7.06419e-05	-2.18545e-06	163.662	-1.08734	0.120084
3	1.2	202	0.492	56.8326	0.889397	1.4265	4.50452	0.649882	-26.863	-1.76918	-0.00601429	-0.0156165	-1.01467e-05	-0.0493317	-0.0202899	98.9972	1.48015e-07	7.06578e-05	-2.38625e-06	164.06	-1.08736	0.123921
3	1.2	203	0.496	57.552	0.889901	1.36052	4.51375	1.3069	-26.9083	-1.75728	-0.0058733	-0.0158451	-1.0259e-05	-0.0500705	-0.0198571	100.397	1.45307e-07	7.06812e-05	-2.68215e-06	164.474	-1.08738	0.127914
3	1.2	204	0.5	58.2714	0.890279	1.28778	4.52495	1.96369	-26.9423	-1.7341	-0.00572749	-0.0160772	-1.03954e-05	-0.0508205	-0.0194091	101.825	1.4202e-07	7.07096e-05	-3.04147e-06	164.9	-1.08739	0.132028
3	1.2	205	0.504	58.9908	0.890551	1.21307	4.53714	2.59331	-26.9667	-1.69589	-0.00557936	-0.0163093	-1.05438e-05	-0.0515707	-0.0189538	103.258	1.38442e-07	7.07405e-05	-3.4325e-06	165.336	-1.0874	0.136233
3	1.2	206	0.508	59.7102	0.890732	1.1412	4.54934	3.16883	-26.983	-1.63889	-0.00543143	-0.0165381	-1.06923e-05	-0.0523105	-0.0184989	104.676	1.34865e-07	7.07715e-05	-3.82352e-06	165.778	-1.0874	0.140494
3	1.2	207	0.512	60.4296	0.890843	1.07696	4.56054	3.66333	-26.9929	-1.55934	-0.00528621	-0.0167603	-1.08287e-05	-0.053029	-0.0180521	106.058	1.31577e-07	7.07999e-05	-4.18284e-06	166.223	-1.0874	0.14478
3	1.2	208	0.516	61.149	0.890899	1.02513	4.56976	4.04989	-26.998	-1.45347	-0.00514619	-0.0169725	-1.0941e-05	-0.0537154	-0.0176212	107.382	1.2887e-07	7.08233e-05	-4.47875e-06	166.666	-1.08741	0.149057
3	1.2	209	0.52	61.8684	0.89092	0.990518	4.57603	4.30156	-26.9999	-1.31755	-0.00501388	-0.0171715	-1.10172e-05	-0.054359	-0.0172139	108.626	1.27033e-07	7.08391e-05	-4.67954e-06	167.106	-1.08741	0.153293
3	1.2	210	0.524	62.5878	0.890923	0.977916	4.57833	4.39144	-27.0002	-1.14779	-0.0048918	-0.0173538	-1.10453e-05	-0.0549488	-0.016838	109.77	1.26356e-07	7.0845e-05	-4.75352e-06	167.537	-1.08741	0.157455
3	1.2	211	0.528	63.3072	0.862679	0.986977	4.56298	4.26623	-27	-0.593621	-0.00477981	-0.0175084	-1.10638e-05	-0.0554496	-0.0164922	110.767	1.25064e-07	7.08482e-05	-4.8927e-06	167.974	-1.08733	0.161662
3	1.2	212	0.532	64.0266	0.792302	1.01078	4.52359	3.95534	-26.9996	0.524691	-0.00468072	-0.0176271	-1.11078e-05	-0.0558348	-0.016185	111.571	1.21983e-07	7.08558e-05	-5.22456e-06	168.421	-1.08713	0.165968
3	1.2	213	0.536	64.746	0.70132	1.04426	4.47016	3.55588	-26.9991	1.9547	-0.00460141	-0.0177107	-1.11603e-05	-0.0561069	-0.0159383	112.167	1.18306e-07	7.0865e-05	-5.62067e-06	168.864	-1.08686	0.170239
3	1.2	214	0.54	65.4654	0.611266	1.08234	4.41269	3.16494	-26.9986	3.44388	-0.00454877	-0.0177602	-1.12043e-05	-0.0562684	-0.0157741	112.537	1.15224e-07	7.08726e-05	-5.95254e-06	169.29	-1.08657	0.174342
3	1.2	215	0.544	66.1848	0.543671	1.11996	4.36118	2.87964	-26.9985	4.7397	-0.0045297	-0.0177764	-1.12227e-05	-0.0563216	-0.0157145	112.664	1.13932e-07	7.08758e-05	-6.09171e-06	169.685	-1.08629	0.178142
3	1.2	216	0.548	66.9042	0.507284	1.15988	4.31842	2.74765	-27.1403	5.84996	-0.00468389	-0.0175696	-1.10676e-05	-0.0556515	-0.016191	111.338	1.12962e-07	7.08748e-05	-6.19531e-06	170.049	-1.08604	0.18164
3	1.2	217	0.552	67.6236	0.487751	1.20549	4.27772	2.70424	-27.4784	6.94296	-0.00507307	-0.0170273	-1.06978e-05	-0.0538954	-0.0173921	107.891	1.10649e-07	7.08725e-05	-6.44237e-06	170.391	-1.08576	0.184924
3	1.2	218	0.556	68.343	0.471948	1.25263	4.23493	2.67788	-27.882	8.00707	-0.00558707	-0.0162667	-1.02564e-05	-0.0514344	-0.0189753	103.123	1.07888e-07	7.08696e-05	-6.73725e-06	170.71	-1.08548	0.187996
3	1.2	219	0.56	69.0624	0.446749	1.29715	4.18587	2.59707	-28.2202	9.03078	-0.0061158	-0.0154047	-9.88658e-06	-0.0486496	-0.0205982	97.8309	1.05575e-07	7.08672e-05	-6.98431e-06	171.008	-1.08521	0.190855
3	1.2	220	0.564	69.7818	0.399028	1.33488	4.12635	2.39028	-28.362	10.0025	-0.00654911	-0.0145587	-9.73149e-06	-0.0459223	-0.0219181	92.8147	1.04605e-07	7.08662e-05	-7.08791e-06	171.284	-1.08496	0.193504
3	3.1	170	0.004	52.0024	1.10091	1.3783	3.4933	33.38	-8.2192	-17.2875	0.0149039	0.00716592	8.22634e-05	-0.439131	0.117781	103.124	5.54289e-07	-3.63457e-05	6.20517e-05	180	-1.01134	-0.0209004
3	3.1	171	0.008	52.5738	1.10627	1.36061	3.5146	33.2559	-8.31723	-17.0447	0.014937	0.00721052	8.27164e-05	-0.44088	0.118628	103.659	5.54289e-07	-3.63457e-05	6.20517e-05	180	-1.01134	-0.0209004
3	3.1	172	0.012	53.1452	1.10983	1.31242	3.53703	32.91	-8.48319	-16.3709	0.0149615	0.00725748	8.31277e-05	-0.442144	0.119662	104.086	5.54289e-07	-3.63457e-05	6.20517e-05	180	-1.01134	-0.0209004
3	3.1	173	0.016	53.7166	1.11238	1.24104	3.55981	32.3816	-8.70391	-15.3476	0.0149789	0.00730766	8.34958e-05	-0.443016	0.120885	104.433	5.54289e-07	-3.63457e-05	6.20517e-05	180	-1.01134	-0.0209004
3	3.1	174	0.02	54.288	1.11474	1.15376	3.58214	31.7101	-8.96622	-14.0567	0.0149907	0.00736188	8.38194e-05	-0.443588	0.122296	104.723	5.54289e-07	-3.63457e-05	6.20517e-05	180	-1.01134	-0.0209004
3	3.1	175	0.024	54.8594	1.11771	1.0579	3.60322	30.9347	-9.25692	-12.5796	0.0149985	0.00742098	8.4097e-05	-0.443952	0.123898	104.984	5.54289e-07	-3.63457e-05	6.20517e-05	180	-1.01134	-0.0209004
3	3.1	176	0.028	55.4308	1.1221	0.960755	3.62225	30.0949	-9.56286	-10.9981	0.0150037	0.0074858	8.43273e-05	-0.4442	0.12569	105.241	5.54289e-07	-3.63457e-05	6.20517e-05	180	-1.01134	-0.0209004
3	3.1	177	0.032	56.0022	1.12872	0.869633	3.63845	29.23	-9.87085	-9.39392	0.015008	0.00755716	8.45089e-05	-0.444424	0.127674	105.518	5.54289e-07	-3.63457e-05	6.20517e-05	180	-1.01134	-0.0209004
3	3.1	178	0.036	56.5736	1.13836	0.791837	3.651	28.3794	-10.1677	-7.84863	0.0150129	0.0076359	8.46403e-05	-0.444715	0.129849	105.843	5.54289e-07	-3.63457e-05	6.20517e-05	180	-1.01134	-0.0209004
3	3.1	179	0.04	57.145	1.15185	0.734672	3.65911	27.5823	-10.4403	-6.44391	0.0150198	0.00772286	8.47202e-05	-0.445165	0.132217	106.24	5.54289e-07	-3.63457e-05	6.20517e-05	180	-1.01134	-0.0209004
3	3.1	180	0.044	57.7164	1.16998	0.705445	3.66199	26.8782	-10.6753	-5.26147	0.0150303	0.00781886	8.47471e-05	-0.445868	0.134779	106.735	5.54289e-07	-3.63457e-05	6.20517e-05	180	-1.01134	-0.0209004
3	3.1	181	0.048	58.2878	1.19929	0.695014	3.66126	26.1772	-10.8608	-4.23901	0.0150442	0.00793869	8.4877e-05	-0.446856	0.137945	107.39	5.54289e-07	-3.63457e-05	6.20517e-05	180	-1.01134	-0.0209004
3	3.1	182	0.052	58.8592	1.24304	0.688688	3.65894	25.3887	-11.0036	-3.25725	0.0150601	0.00808969	8.52296e-05	-0.448052	0.141944	108.215	5.54289e-07	-3.63457e-05	6.20517e-05	180	-1.01134	-0.0209004
3	3.1	183	0.056	59.4306	1.29709	0.685439	3.65485	24.5507	-11.1192	-2.31234	0.015077	0.00826153	8.57492e-05	-0.449384	0.146501	109.153	5.54289e-07	-3.63457e-05	6.20517e-05	180	-1.01134	-0.0209004
3	3.1	184	0.06	60.002	1.35732	0.684242	3.64882	23.7011	-11.2229	-1.40042	0.0150943	0.00844391	8.63802e-05	-0.450778	0.151341	110.148	5.54289e-07	-3.63457e-05	6.20517e-05	180	-1.01134	-0.0209004
3	3.1	185	0.064	60.5734	1.41961	0.684071	3.64066	22.878	-11.3301	-0.517612	0.015111	0.00862653	8.70669e-05	-0.45216	0.156189	111.144	5.54289e-07	-3.63457e-05	6.20517e-05	180	-1.01134	-0.0209004
3	3.1	186	0.068	61.1448	1.47982	0.6839	3.63021	22.1194	-11.4562	0.339913	0.0151265	0.00879906	8.77535e-05	-0.453456	0.160772	112.085	5.54289e-07	-3.63457e-05	6.20517e-05	180	-1.01134	-0.0209004
3	3.1	187	0.072	61.7162	1.53384	0.682703	3.61728	21.4632	-11.6167	1.17603	0.0151399	0.0089512	8.83845e-05	-0.454592	0.164814	112.914	5.54289e-07	-3.63457e-05	6.20517e-05	180	-1.01134	-0.0209004
3	3.1	188	0.076	62.2876	1.57753	0.679454	3.6017	20.9474	-11.8269	1.9946	0.0151504	0.00907264	8.89041e-05	-0.455494	0.168042	113.576	5.54289e-07	-3.63457e-05	6.20517e-05	180	-1.01134	-0.0209004
3	3.1	189	0.08	62.859	1.60677	0.673127	3.58328	20.6101	-12.1023	2.79948	0.0151573	0.00915307	8.92567e-05	-0.45609	0.170179	114.014	5.54289e-07	-3.63457e-05	6.20517e-05	180	-1.01134	-0.0209004
3	3.1	190	0.084	63.4304	1.61744	0.662697	3.56185	20.4893	-12.4581	3.59452	0.0151598	0.00918217	8.93866e-05	-0.456305	0.170953	114.172	5.54289e-07	-3.63457e-05	6.20517e-05	180	-1.01134	-0.0209004
3	3.1	191	0.088	64.0018	1.60234	0.641388	3.53058	20.4894	-12.9986	4.32416	0.0151598	0.00918106	8.93413e-05	-0.456298	0.170923	114.166	5.54289e-07	-3.63457e-05	6.20517e-05	180	-1.01134	-0.0209004
3	3.1	192	0.092	64.5732	1.56042	0.606798	3.48585	20.4907	-13.7675	4.95434	0.0151595	0.00917335	8.92332e-05	-0.456252	0.170716	114.125	5.54289e-07	-3.63457e-05	6.20517e-05	180	-1.01134	-0.0209004
3	3.1	193	0.096	65.1446	1.49671	0.564452	3.43228	20.494	-14.6897	5.52124	0.0151587	0.00915241	8.91041e-05	-0.456124	0.170154	114.011	5.54289e-07	-3.63457e-05	6.20517e-05	180	-1.01134	-0.0209004
3	3.1	194	0.1	65.716	1.41626	0.51988	3.37449	20.5006	-15.6903	6.06098	0.0151572	0.00911164	8.8996e-05	-0.455877	0.16906	113.789	5.54289e-07	-3.63457e-05	6.20517e-05	180	-1.01134	-0.0209004
3	3.1	195	0.104	66.2874	1.32411	0.478607	3.31709	20.5114	-16.6943	6.60975	0.0151548	0.00904442	8.89507e-05	-0.455469	0.167257	113.424	5.54289e-07	-3.63457e-05	6.20517e-05	180	-1.01134	-0.0209004
3	3.1	196	0.108	66.8588	1.21262	0.434282	3.24904	20.9426	-17.9012	7.24591	0.0151523	0.0089675	8.89104e-05	-0.455099	0.165148	113.017	5.54289e-07	-3.63457e-05	6.20517e-05	180	-1.01134	-0.0209004
3	3.1	197	0.112	67.4302	1.07845	0.383219	3.16726	21.9888	-19.3611	7.94536	0.0151482	0.00887942	8.87177e-05	-0.454716	0.162703	112.558	5.54289e-07	-3.63457e-05	6.20517e-05	180	-1.01134	-0.0209004
3	3.1	198	0.116	68.0016	0.93302	0.334947	3.08832	23.3191	-20.7745	8.59054	0.0151384	0.00874622	8.82649e-05	-0.453905	0.15909	111.848	5.54289e-07	-3.63457e-05	6.20517e-05	180	-1.01134	-0.0209004
3	3.1	199	0.12	68.573	0.787787	0.298996	3.0288	24.6024	-21.8421	9.06386	0.0151189	0.00853394	8.74442e-05	-0.452254	0.153476	110.686	5.54289e-07	-3.63457e-05	6.20517e-05	180	-1.01134	-0.0209004
3	3.1	200	0.124	69.1444	0.654197	0.284895	3.00527	25.5077	-22.2645	9.24776	0.0150856	0.00820863	8.6148e-05	-0.449346	0.145028	108.871	5.54289e-07	-3.63457e-05	6.20517e-05	180	-1.01134	-0.0209004
3	3.1	201	0.128	69.7158	0.53362	0.287674	3.02714	26.0063	-22.2634	9.13011	0.0150137	0.00773128	8.4278e-05	-0.444622	0.132669	106.223	5.54289e-07	-3.63457e-05	6.20517e-05	180	-1.01134	-0.0209004
3	3.1	202	0.132	70.2872	0.41843	0.294821	3.07929	26.3188	-22.2606	8.83099	0.0148848	0.00712451	8.1906e-05	-0.438008	0.116953	102.876	5.54289e-07	-3.63457e-05	6.20517e-05	180	-1.01134	-0.0209004
3	3.1	203	0.136	70.8586	0.306563	0.304551	3.14154	26.4884	-22.2574	8.43118	0.0147044	0.00644687	7.91795e-05	-0.429819	0.099498	99.0996	5.54289e-07	-3.63457e-05	6.20517e-05	180	-1.01134	-0.0209004
3	3.1	204	0.14	71.43	0.19595	0.31508	3.19369	26.5585	-22.2546	8.0114	0.014478	0.00575684	7.62455e-05	-0.420366	0.081921	95.1652	5.54289e-07	-3.63457e-05	6.20517e-05	180	-1.01134	-0.0209004
3	3.1	205	0.144	72.0014	0.0845266	0.324625	3.21556	26.5722	-22.2535	7.65245	0.014211	0.00511295	7.32514e-05	-0.409966	0.0658398	91.3434	5.54289e-07	-3.63457e-05	6.20517e-05	180	-1.01134	-0.0209004
3	3.1	206	0.148	72.5728	-0.0314139	0.334701	3.20207	26.5636	-22.4358	7.43608	0.013907	0.00450864	7.01915e-05	-0.398678	0.0510594	87.6524	5.54779e-07	-3.62436e-05	6.21094e-05	179.64	-1.01135	-0.019975
3	3.1	207	0.152	73.1442	-0.1505	0.346499	3.16989	26.5039	-22.871	7.30847	0.0135623	0.00390485	6.69673e-05	-0.386291	0.0365008	83.9114	5.55949e-07	-3.6e-05	6.2247e-05	179.281	-1.01137	-0.0174892
3	3.1	208	0.156	73.7156	-0.267164	0.357743	3.13149	26.3418	-23.3919	7.14694	0.0131716	0.00331149	6.35878e-05	-0.372717	0.0224573	80.0936	5.57346e-07	-3.57092e-05	6.24112e-05	178.921	-1.0114	-0.0138792
3	3.1	209	0.16	74.287	-0.375838	0.366157	3.09931	26.026	-23.8312	6.82883	0.0127299	0.00273844	6.00618e-05	-0.357868	0.0092221	76.172	5.58516e-07	-3.54656e-05	6.25488e-05	178.562	-1.01141	-0.00958074
3	3.1	210	0.164	74.8584	-0.470964	0.369468	3.08582	25.5055	-24.0214	6.23146	0.012232	0.00219555	5.63981e-05	-0.341653	-0.00291236	72.1193	5.59006e-07	-3.53635e-05	6.26065e-05	178.202	-1.01142	-0.00502975
3	3.1	211	0.168	75.4298	-0.554688	0.365814	3.10928	24.6168	-24.0295	5.33734	0.0116512	0.00168044	5.24809e-05	-0.32334	-0.0138744	67.8321	5.5984e-07	-3.51691e-05	6.2705e-05	177.956	-1.01134	4.36256e-05
3	3.1	212	0.172	76.0012	-0.630717	0.3571	3.16936	23.3341	-24.0345	4.22829	0.010991	0.00118655	4.83044e-05	-0.302989	-0.0238592	63.3283	5.6183e-07	-3.47058e-05	6.294e-05	177.33	-1.01114	0.00592987
3	3.1	213	0.176	76.5726	-0.695832	0.346699	3.25059	21.8122	-24.037	2.93048	0.0102913	0.000717424	4.40422e-05	-0.281698	-0.0329741	58.7634	5.64204e-07	-3.41527e-05	6.32205e-05	176.493	-1.01086	0.0122244
3	3.1	214	0.18	77.144	-0.746806	0.337985	3.3375	20.2061	-24.0379	1.47015	0.00959221	0.000276649	3.98679e-05	-0.260568	-0.0413261	54.293	5.66194e-07	-3.36894e-05	6.34554e-05	175.614	-1.01055	0.0185222
3	3.1	215	0.184	77.7154	-0.780416	0.334331	3.41463	18.6708	-24.038	-0.126427	0.00893375	-0.000132193	3.59552e-05	-0.240698	-0.0490221	50.0726	5.67028e-07	-3.34951e-05	6.3554e-05	174.863	-1.01025	0.0244184
3	3.1	216	0.188	78.2868	-0.791993	0.414963	3.49805	17.2152	-23.7502	-2.82614	0.00834895	-0.000401825	3.27622e-05	-0.223526	-0.0533317	46.5565	5.68217e-07	-3.31881e-05	6.3695e-05	174.257	-1.00988	0.0297556
3	3.1	217	0.192	78.8582	-0.796319	0.495595	3.5554	15.3677	-23.4624	-5.36059	0.00785825	-0.000546326	3.03295e-05	-0.209533	-0.0547393	43.8143	5.69406e-07	-3.28812e-05	6.38361e-05	173.787	-1.0095	0.0338939
3	3.1	218	0.196	79.4296	-0.803539	0.463645	3.56589	12.3388	-23.9049	-6.00127	0.00741866	-0.000675394	2.81526e-05	-0.197002	-0.0560421	41.3247	5.69804e-07	-3.27738e-05	6.38834e-05	173.44	-1.00923	0.0369429
3	3.1	219	0.2	80.001	-0.811382	0.404309	3.56976	9.05173	-24.7267	-6.06792	0.007024	-0.000775297	2.62465e-05	-0.185833	-0.0567855	39.1165	5.70543e-07	-3.25744e-05	6.39713e-05	173.172	-1.009	0.039292
3	3.1	220	0.204	80.5724	-0.827176	0.372359	3.57031	7.5107	-25.1693	-6.75374	0.00675067	-0.000839371	2.49385e-05	-0.178118	-0.0570217	37.5928	5.70941e-07	-3.2467e-05	6.40186e-05	173.065	-1.00891	0.0402325
3	3.1	221	0.208	81.1438	-0.851774	0.393196	3.53511	7.62939	-25.0655	-8.62779	0.00659028	-0.000875107	2.41745e-05	-0.173597	-0.0570211	36.6987	5.69453e-07	-3.28207e-05	6.38427e-05	173.664	-1.00917	0.0349572
3	3.1	222	0.212	81.7152	-0.880187	0.450406	3.44619	7.91242	-24.7716	-11.2845	0.00647855	-0.000896784	2.3654e-05	-0.170467	-0.0570195	36.0806	5.65903e-07	-3.36641e-05	6.34231e-05	175.103	-1.0098	0.0222713
3	3.1	223	0.216	82.2866	-0.910987	0.536027	3.32857	8.25024	-24.3138	-14.455	0.00640801	-0.000907915	2.33347e-05	-0.168507	-0.0570177	35.6941	5.61667e-07	-3.46707e-05	6.29223e-05	176.849	-1.01055	0.00688536
3	3.1	224	0.22	82.858	-0.942741	0.642099	3.20727	8.53327	-23.7184	-17.8703	0.00637117	-0.000912016	2.31742e-05	-0.167494	-0.0570162	35.4948	5.58117e-07	-3.55141e-05	6.25027e-05	178.367	-1.01118	-0.00648964
3	3.1	225	0.224	83.4294	-0.974022	0.760668	3.1073	8.65196	-23.0115	-21.2617	0.00636055	-0.000912602	2.31301e-05	-0.167205	-0.0570155	35.4383	5.56629e-07	-3.58678e-05	6.23267e-05	179.121	-1.01144	-0.0131438
3	3.1	226	0.228	84.0008	-1.0101	0.908806	3.01943	8.30418	-22.0766	-24.8269	0.00652224	-0.000871409	2.39123e-05	-0.171783	-0.0567252	36.3442	5.5654e-07	-3.58863e-05	6.23162e-05	179.271	-1.01144	-0.0144665
3	3.1	227	0.232	84.5722	-1.05193	1.09182	2.92698	7.47488	-20.896	-28.7451	0.00692678	-0.00076686	2.58739e-05	-0.183245	-0.0559586	38.6134	5.56327e-07	-3.59303e-05	6.22912e-05	179.35	-1.01144	-0.0151589
3	3.1	228	0.236	85.1436	-1.0916	1.28409	2.84381	6.48505	-19.6449	-32.7198	0.00745343	-0.000627488	2.84373e-05	-0.198183	-0.0548725	41.5735	5.56072e-07	-3.59828e-05	6.22613e-05	179.386	-1.01143	-0.0154771
3	3.1	229	0.24	85.715	-1.12121	1.46002	2.78375	5.65574	-18.4983	-36.454	0.00798141	-0.000481836	3.10252e-05	-0.213189	-0.0536235	44.5517	5.55859e-07	-3.60268e-05	6.22362e-05	179.408	-1.01142	-0.0156774
3	3.1	230	0.244	86.2864	-1.13283	1.59398	2.76065	5.30797	-17.6314	-39.6511	0.00838996	-0.000358445	3.30599e-05	-0.224855	-0.0523683	46.8754	5.5577e-07	-3.60453e-05	6.22257e-05	179.447	-1.01142	-0.0160159
3	3.1	231	0.248	86.8578	-1.11039	1.67469	2.77884	5.42773	-17.1069	-42.2061	0.00865704	-0.000265617	3.44267e-05	-0.232543	-0.0512191	48.4132	5.55705e-07	-3.60584e-05	6.22181e-05	179.501	-1.01142	-0.0164905
3	3.1	232	0.252	87.4292	-1.0552	1.71922	2.82222	5.73412	-16.8083	-44.3168	0.00886315	-0.000184331	3.55106e-05	-0.238525	-0.0500715	49.6133	5.55551e-07	-3.60899e-05	6.22001e-05	179.55	-1.01141	-0.0169303
3	3.1	233	0.256	88.0006	-0.985459	1.74451	2.87399	6.14783	-16.6411	-46.1407	0.00904137	-0.000102123	3.64838e-05	-0.243759	-0.0487572	50.6732	5.55368e-07	-3.61274e-05	6.21785e-05	179.597	-1.0114	-0.0173386
3	3.1	234	0.26	88.572	-0.919374	1.7675	2.91737	6.58956	-16.5109	-47.8353	0.00922477	-6.52922e-06	3.75185e-05	-0.2492	-0.0471075	51.7903	5.55214e-07	-3.61589e-05	6.21604e-05	179.64	-1.0114	-0.0177187
3	3.1	235	0.264	89.1434	-0.875147	1.8051	2.93556	6.98001	-16.3235	-49.5581	0.00944643	0.000114914	3.87868e-05	-0.255807	-0.0449542	53.162	5.55149e-07	-3.61721e-05	6.21528e-05	179.68	-1.01139	-0.0180738
3	3.1	236	0.268	89.7148	-0.853474	1.86809	2.9326	7.37456	-16.1063	-51.2337	0.00970882	0.000258275	4.0287e-05	-0.263625	-0.0424158	54.7835	5.55106e-07	-3.61809e-05	6.21477e-05	179.717	-1.01139	-0.0184018
3	3.1	237	0.272	90.2862	-0.840987	1.94518	2.92227	7.8261	-15.9221	-52.7572	0.00998992	0.000415254	4.19044e-05	-0.272019	-0.0396048	56.5234	5.55002e-07	-3.62019e-05	6.21354e-05	179.751	-1.01139	-0.0187005
3	3.1	238	0.276	90.8576	-0.834798	2.02021	2.90243	8.25153	-15.7298	-54.2416	0.010286	0.000591735	4.36414e-05	-0.280915	-0.0363429	58.3886	5.54878e-07	-3.6227e-05	6.21209e-05	179.782	-1.01138	-0.0189731
3	3.1	239	0.28	91.429	-0.832021	2.07707	2.87092	8.56772	-15.4883	-55.7999	0.0105933	0.000793605	4.55007e-05	-0.290244	-0.0324521	60.386	5.54774e-07	-3.62481e-05	6.21087e-05	179.81	-1.01137	-0.0192229
3	3.1	240	0.284	92.0004	-0.829765	2.09961	2.82558	8.69159	-15.1565	-57.545	0.010908	0.00102676	4.74849e-05	-0.299935	-0.0277543	62.5226	5.5473e-07	-3.62569e-05	6.21036e-05	179.836	-1.01137	-0.0194532
3	3.1	241	0.288	92.5718	-0.827834	2.08019	2.753	8.54755	-14.6997	-59.406	0.0112286	0.00126802	4.95172e-05	-0.309824	-0.0228669	64.6833	5.54704e-07	-3.62622e-05	6.21004e-05	179.86	-1.01137	-0.0196618
3	3.1	242	0.292	93.1432	-0.827321	2.02991	2.65462	8.17708	-14.1452	-61.3073	0.0115575	0.00151346	5.15959e-05	-0.319959	-0.017909	66.8632	5.54641e-07	-3.6275e-05	6.2093e-05	179.881	-1.01137	-0.0198465
3	3.1	243	0.296	93.7146	-0.827282	1.96077	2.55055	7.67259	-13.5452	-63.3559	0.0118972	0.00179785	5.3836e-05	-0.330584	-0.0119538	69.2354	5.54565e-07	-3.62902e-05	6.20842e-05	179.899	-1.01136	-0.0200106
3	3.1	244	0.3	94.286	-0.826769	1.88475	2.46092	7.12653	-12.9518	-65.6582	0.0122502	0.00215595	5.63528e-05	-0.341944	-0.00407515	71.9727	5.54502e-07	-3.63029e-05	6.20767e-05	179.916	-1.01136	-0.0201573
3	3.1	245	0.304	94.8574	-0.824838	1.81386	2.40584	6.63135	-12.4172	-68.3209	0.0126191	0.0026225	5.92613e-05	-0.354284	0.00665323	75.2478	5.54475e-07	-3.63083e-05	6.20736e-05	179.931	-1.01136	-0.0202899
3	3.1	246	0.308	95.4288	-0.794343	1.74415	2.38055	6.10819	-11.8824	-71.8964	0.0130756	0.00335096	6.33163e-05	-0.370325	0.0240116	79.9755	5.54462e-07	-3.6311e-05	6.2072e-05	179.944	-1.01136	-0.0204062
3	3.1	247	0.312	96.0002	-0.724492	1.66762	2.36521	5.49543	-11.3129	-76.3134	0.0136181	0.00431812	6.84411e-05	-0.389903	0.0473821	86.0403	5.54429e-07	-3.63176e-05	6.20682e-05	179.955	-1.01135	-0.0205041
3	3.1	248	0.316	96.5716	-0.638867	1.59019	2.35733	4.91134	-10.7967	-80.7436	0.0141389	0.00529385	7.35034e-05	-0.408937	0.0710945	92.0704	5.5439e-07	-3.63254e-05	6.20636e-05	179.965	-1.01135	-0.0205867
3	3.1	249	0.32	97.143	-0.561042	1.51775	2.35443	4.47416	-10.4223	-84.3589	0.0145303	0.00604806	7.73711e-05	-0.423349	0.0894801	96.6945	5.54358e-07	-3.63319e-05	6.20598e-05	179.973	-1.01135	-0.0206575
3	3.1	250	0.324	97.7144	-0.514599	1.45622	2.35401	4.30215	-10.2779	-86.3309	0.0146847	0.00635061	7.8912e-05	-0.42906	0.0968686	98.5407	5.54344e-07	-3.63346e-05	6.20582e-05	179.98	-1.01135	-0.0207195
3	3.1	251	0.328	98.2858	-0.495981	1.4025	2.35953	5.60959	-10.322	-87.042	0.0146845	0.00635002	7.88793e-05	-0.429052	0.0968537	98.5374	5.54339e-07	-3.63357e-05	6.20576e-05	179.986	-1.01135	-0.0207736
3	3.1	252	0.332	98.8572	-0.484688	1.35267	2.37604	8.72743	-10.4274	-87.4734	0.0146832	0.00634593	7.88012e-05	-0.428996	0.0967497	98.5141	5.54327e-07	-3.63381e-05	6.20562e-05	179.991	-1.01135	-0.0208176
3	3.1	253	0.336	99.4286	-0.478889	1.31134	2.40347	12.4487	-10.5531	-87.6948	0.0146797	0.00633481	7.87081e-05	-0.428845	0.0964673	98.4508	5.54313e-07	-3.63409e-05	6.20545e-05	179.995	-1.01135	-0.0208503
3	3.1	254	0.34	0	-0.476753	1.28315	2.44176	15.5665	-10.6584	-87.7764	0.0146728	0.00631317	7.863e-05	-0.428549	0.0959174	98.3276	5.54301e-07	-3.63433e-05	6.20531e-05	179.997	-1.01134	-0.0208707
3	3.1	255	0.344	0.5714	-0.476447	1.27273	2.49084	16.874	-10.7026	-87.7881	0.0146615	0.00627749	7.85973e-05	-0.428063	0.0950107	98.1245	5.54296e-07	-3.63444e-05	6.20525e-05	179.998	-1.01134	-0.0208778
3	3.1	256	0.348	1.1428	-0.476715	1.27746	2.55936	16.6364	-10.3074	-87.1317	0.0146262	0.00617695	7.82712e-05	-0.426597	0.0924743	97.5459	5.54295e-07	-3.63445e-05	6.20524e-05	179.998	-1.01134	-0.0208801
3	3.1	257	0.352	1.7142	-0.478589	1.29086	2.64735	16.07	-9.30137	-85.451	0.0145591	0.00599319	7.7459e-05	-0.42385	0.0878507	96.4839	5.54293e-07	-3.63448e-05	6.20522e-05	179.998	-1.01134	-0.0208858
3	3.1	258	0.356	2.2856	-0.483677	1.31171	2.74186	15.3939	-7.95379	-83.1785	0.014477	0.00577131	7.64101e-05	-0.420502	0.0822738	95.1994	5.54291e-07	-3.63453e-05	6.2052e-05	179.998	-1.01134	-0.0208924
3	3.1	259	0.36	2.857	-0.493584	1.33879	2.82991	14.8274	-6.53395	-80.747	0.0143965	0.00555642	7.53739e-05	-0.417233	0.0768779	93.9536	5.54289e-07	-3.63456e-05	6.20518e-05	179.998	-1.01134	-0.0208981
3	3.1	260	0.364	3.4284	-0.509917	1.37089	2.89854	14.5898	-5.31116	-78.5891	0.0143343	0.00539367	7.45998e-05	-0.414725	0.072797	93.0075	5.54289e-07	-3.63457e-05	6.20517e-05	180	-1.01134	-0.0209004
3	3.1	261	0.368	3.9998	-0.550287	1.40888	2.94306	14.7445	-4.23626	-76.4496	0.0142886	0.0052812	7.40747e-05	-0.412919	0.0699907	92.3483	5.54289e-07	-3.63457e-05	6.20517e-05	180	-1.01134	-0.0209004
3	3.1	262	0.372	4.5712	-0.617512	1.45357	2.9721	15.1506	-3.12975	-74.0401	0.0142483	0.00518894	7.36324e-05	-0.411361	0.0677032	91.8017	5.54289e-07	-3.63457e-05	6.20517e-05	180	-1.01134	-0.0209004
3	3.1	263	0.376	5.1426	-0.69101	1.50366	2.99271	15.7217	-2.06531	-71.7435	0.0142162	0.00511965	7.32924e-05	-0.410139	0.0659947	91.3873	5.54289e-07	-3.63457e-05	6.20517e-05	180	-1.01134	-0.0209004
3	3.1	264	0.38	5.714	-0.750203	1.55781	3.01194	16.3712	-1.11658	-69.9423	0.0141948	0.00507605	7.30742e-05	-0.409341	0.0649255	91.1245	5.54289e-07	-3.63457e-05	6.20517e-05	180	-1.01134	-0.0209004
3	3.1	265	0.384	6.2854	-0.774508	1.61473	3.03684	17.0124	-0.357248	-69.0193	0.0141871	0.00506091	7.29971e-05	-0.409055	0.0645556	91.0326	5.54289e-07	-3.63457e-05	6.20517e-05	180	-1.01134	-0.0209004
3	3.1	266	0.388	6.8568	-0.737321	1.68657	3.07298	17.6357	0.202858	-68.7866	0.0142431	0.00520878	7.36707e-05	-0.411319	0.068266	91.8914	5.54289e-07	-3.63457e-05	6.20517e-05	180	-1.01134	-0.0209004
3	3.1	267	0.392	7.4282	-0.64864	1.77421	3.11568	18.2987	0.612875	-68.7249	0.0143764	0.00556139	7.52772e-05	-0.416717	0.0771141	93.9393	5.54289e-07	-3.63457e-05	6.20517e-05	180	-1.01134	-0.0209004
3	3.1	268	0.396	7.9996	-0.542796	1.8594	3.15654	19.0161	0.887514	-68.7201	0.0145357	0.00598226	7.71945e-05	-0.42316	0.0876748	96.3837	5.54289e-07	-3.63457e-05	6.20517e-05	180	-1.01134	-0.0209004
3	3.1	269	0.4	8.571	-0.454117	1.92389	3.18721	19.8025	1.0415	-68.6584	0.014669	0.00633487	7.88009e-05	-0.428558	0.0965228	98.4316	5.54289e-07	-3.63457e-05	6.20517e-05	180	-1.01134	-0.0209004
3	3.1	270	0.404	9.1424	-0.416928	1.94945	3.19929	20.6725	1.08955	-68.4256	0.014725	0.00648274	7.94746e-05	-0.430821	0.100233	99.2905	5.54289e-07	-3.63457e-05	6.20517e-05	180	-1.01134	-0.0209004
3	3.1	271	0.408	9.7138	-0.4225	1.94943	3.19899	21.652	0.891153	-67.7731	0.0147087	0.0064408	7.92817e-05	-0.430167	0.0991834	99.0462	5.54289e-07	-3.63457e-05	6.20517e-05	180	-1.01134	-0.0209004
3	3.1	272	0.412	10.2852	-0.437621	1.94933	3.19816	22.7333	0.348397	-66.5909	0.0146633	0.00632479	7.87471e-05	-0.428351	0.09628	98.37	5.54289e-07	-3.63457e-05	6.20517e-05	180	-1.01134	-0.0209004
3	3.1	273	0.416	10.8566	-0.459905	1.94905	3.19694	23.8807	-0.4601	-64.9733	0.0145942	0.00614938	7.7937e-05	-0.425593	0.0918921	97.3466	5.54289e-07	-3.63457e-05	6.20517e-05	180	-1.01134	-0.0209004
3	3.1	274	0.42	11.428	-0.486964	1.94851	3.19546	25.0585	-1.45569	-63.0149	0.014507	0.00592926	7.69179e-05	-0.422115	0.0863889	96.0606	5.54289e-07	-3.63457e-05	6.20517e-05	180	-1.01134	-0.0209004
3	3.1	275	0.424	11.9994	-0.516411	1.94761	3.19385	26.2309	-2.5597	-60.81	0.0144068	0.00567911	7.57558e-05	-0.418136	0.0801399	94.5968	5.54289e-07	-3.63457e-05	6.20517e-05	180	-1.01134	-0.0209004
3	3.1	276	0.428	12.5708	-0.545858	1.94628	3.19224	27.3622	-3.69355	-58.453	0.0142992	0.0054136	7.45171e-05	-0.413879	0.0735139	93.0401	5.54289e-07	-3.63457e-05	6.20517e-05	180	-1.01134	-0.0209004
3	3.1	277	0.432	13.1422	-0.572918	1.94442	3.19075	28.4168	-4.77857	-56.0384	0.0141896	0.00514742	7.32681e-05	-0.409562	0.0668803	91.475	5.54289e-07	-3.63457e-05	6.20517e-05	180	-1.01134	-0.0209004
3	3.1	278	0.436	13.7136	-0.595201	1.94194	3.18953	29.3588	-5.7361	-53.6605	0.0140833	0.00489526	7.20749e-05	-0.405407	0.0606083	89.9864	5.54289e-07	-3.63457e-05	6.20517e-05	180	-1.01134	-0.0209004
3	3.1	279	0.44	14.285	-0.610323	1.93876	3.18871	30.1525	-6.48754	-51.4138	0.0139858	0.00467179	7.10039e-05	-0.401635	0.055067	88.659	5.54289e-07	-3.63457e-05	6.20517e-05	180	-1.01134	-0.0209004
3	3.1	280	0.444	14.8564	-0.615894	1.93479	3.1884	30.7622	-6.95423	-49.3926	0.0139024	0.0044917	7.01213e-05	-0.398465	0.0506257	87.5775	5.54289e-07	-3.63457e-05	6.20517e-05	180	-1.01134	-0.0209004
3	3.1	281	0.448	15.4278	-0.610031	1.92118	3.19414	31.2192	-7.2235	-47.4677	0.0138233	0.00433714	6.93334e-05	-0.395543	0.0468522	86.6311	5.54289e-07	-3.63457e-05	6.20517e-05	180	-1.01134	-0.0209004
3	3.1	282	0.452	15.9992	-0.593571	1.89182	3.20972	31.5851	-7.43913	-45.4694	0.0137375	0.00418298	6.85193e-05	-0.392441	0.0431235	85.67	5.54289e-07	-3.63457e-05	6.20517e-05	180	-1.01134	-0.0209004
3	3.1	283	0.456	16.5706	-0.568208	1.85074	3.23268	31.87	-7.60706	-43.4314	0.0136486	0.00403295	6.77048e-05	-0.389274	0.0395226	84.7214	5.54289e-07	-3.63457e-05	6.20517e-05	180	-1.01134	-0.0209004
3	3.1	284	0.46	17.142	-0.535637	1.80199	3.26056	32.0841	-7.73325	-41.3875	0.01356	0.00389079	6.69155e-05	-0.386157	0.0361326	83.812	5.54289e-07	-3.63457e-05	6.20517e-05	180	-1.01134	-0.0209004
3	3.1	285	0.464	17.7134	-0.497553	1.74959	3.2909	32.2376	-7.82367	-39.3713	0.0134753	0.00376025	6.61772e-05	-0.383205	0.0330364	82.9687	5.54289e-07	-3.63457e-05	6.20517e-05	180	-1.01134	-0.0209004
3	3.1	286	0.468	18.2848	-0.45565	1.69758	3.32124	32.3404	-7.88429	-37.4166	0.0133981	0.00364505	6.55154e-05	-0.380533	0.0303171	82.2184	5.54289e-07	-3.63457e-05	6.20517e-05	180	-1.01134	-0.0209004
3	3.1	287	0.472	18.8562	-0.411623	1.64999	3.34911	32.4028	-7.92105	-35.5571	0.0133318	0.00354895	6.4956e-05	-0.378254	0.0280576	81.5881	5.54289e-07	-3.63457e-05	6.20517e-05	180	-1.01134	-0.0209004
3	3.1	288	0.476	19.4276	-0.367166	1.61086	3.37207	32.4348	-7.93993	-33.8266	0.0132801	0.00347567	6.45246e-05	-0.376485	0.0263408	81.1045	5.54289e-07	-3.63457e-05	6.20517e-05	180	-1.01134	-0.0209004
3	3.1	289	0.48	19.999	-0.323973	1.58422	3.38765	32.4467	-7.94688	-32.2587	0.0132465	0.00342897	6.4247e-05	-0.375339	0.0252499	80.7947	5.54289e-07	-3.63457e-05	6.20517e-05	180	-1.01134	-0.0209004
3	3.1	290	0.484	20.5704	-0.283741	1.5741	3.39339	32.4483	-7.94788	-30.8871	0.0132345	0.00341257	6.41487e-05	-0.374931	0.0248679	80.6854	5.54289e-07	-3.63457e-05	6.20517e-05	180	-1.01134	-0.0209004
3	3.1	291	0.488	21.1418	-0.245266	1.57368	3.38892	32.4307	-7.93758	-29.7275	0.0132468	0.00343142	6.42879e-05	-0.375357	0.0253163	80.8068	5.54289e-07	-3.63457e-05	6.20517e-05	180	-1.01134	-0.0209004
3	3.1	292	0.492	21.7132	-0.206124	1.57343	3.3766	32.383	-7.90646	-28.7532	0.0132806	0.00348356	6.46658e-05	-0.376531	0.0265562	81.1422	5.54289e-07	-3.63457e-05	6.20517e-05	180	-1.01134	-0.0209004
3	3.1	293	0.496	22.2846	-0.166177	1.5733	3.35804	32.3126	-7.85425	-27.9354	0.0133315	0.00356233	6.52226e-05	-0.378302	0.0284297	81.649	5.54289e-07	-3.63457e-05	6.20517e-05	180	-1.01134	-0.0209004
3	3.1	294	0.5	22.856	-0.125281	1.57325	3.33487	32.2271	-7.78062	-27.2449	0.0133951	0.00366109	6.58988e-05	-0.380519	0.0307789	82.2843	5.54289e-07	-3.63457e-05	6.20517e-05	180	-1.01134	-0.0209004
3	3.1	295	0.504	23.4274	-0.0832964	1.57324	3.30871	32.1341	-7.68528	-26.6528	0.0134671	0.00377321	6.66346e-05	-0.383029	0.0334459	83.0053	5.54289e-07	-3.63457e-05	6.20517e-05	180	-1.01134	-0.0209004
3	3.1	296	0.508	23.9988	-0.0400838	1.57323	3.28118	32.0411	-7.56792	-26.1299	0.0135429	0.00389203	6.73704e-05	-0.38568	0.0362728	83.7692	5.54289e-07	-3.63457e-05	6.20517e-05	180	-1.01134	-0.0209004
3	3.1	297	0.512	24.5702	0.00449973	1.57319	3.2539	31.9556	-7.42825	-25.6474	0.0136183	0.00401091	6.80466e-05	-0.388321	0.0391017	84.5333	5.54289e-07	-3.63457e-05	6.20517e-05	180	-1.01134	-0.0209004
3	3.1	298	0.516	25.1416	0.0505939	1.57306	3.22849	31.8852	-7.26597	-25.176	0.0136888	0.00412322	6.86034e-05	-0.390799	0.0417747	85.2548	5.54289e-07	-3.63457e-05	6.20517e-05	180	-1.01134	-0.0209004
3	3.1	299	0.52	25.713	0.0983382	1.5728	3.20658	31.8375	-7.08077	-24.6868	0.0137499	0.00422229	6.89813e-05	-0.392963	0.0441338	85.8907	5.54289e-07	-3.63457e-05	6.20517e-05	180	-1.01134	-0.0209004
3	3.1	300	0.524	26.2844	0.147876	1.57239	3.18979	31.8199	-6.87234	-24.1508	0.0137974	0.00430151	6.91205e-05	-0.394661	0.0460213	86.3985	5.54289e-07	-3.63457e-05	6.20517e-05	180	-1.01134	-0.0209004
3	3.1	301	0.528	26.8558	0.199832	1.55416	3.17818	31.8671	-6.60779	-23.6018	0.0138253	0.00434924	6.91848e-05	-0.395669	0.0471599	86.7037	5.54289e-07	-3.63457e-05	6.20517e-05	180	-1.01134	-0.0209004
3	3.1	302	0.532	27.4272	0.254391	1.50507	3.17015	31.9965	-6.26847	-23.0887	0.0138368	0.00436891	6.93382e-05	-0.396081	0.0476317	86.8279	5.54289e-07	-3.63457e-05	6.20517e-05	180	-1.01134	-0.0209004
3	3.1	303	0.536	27.9986	0.311032	1.43201	3.16476	32.1899	-5.87542	-22.6044	0.0138409	0.00437642	6.95212e-05	-0.396225	0.0478173	86.8723	5.54289e-07	-3.63457e-05	6.20517e-05	180	-1.01134	-0.0209004
3	3.1	304	0.54	28.57	0.369232	1.34182	3.16109	32.4289	-5.44971	-22.1421	0.0138465	0.00438767	6.96746e-05	-0.396428	0.0480971	86.9378	5.54289e-07	-3.63457e-05	6.20517e-05	180	-1.01134	-0.0209004
3	3.1	305	0.544	29.1414	0.428465	1.24137	3.15822	32.6954	-5.01243	-21.6947	0.0138626	0.00441856	6.97389e-05	-0.397019	0.0488519	87.1257	5.54289e-07	-3.63457e-05	6.20517e-05	180	-1.01134	-0.0209004
3	3.1	306	0.548	29.7128	0.488212	1.13755	3.1552	32.9709	-4.58462	-21.2553	0.0138887	0.00446639	6.98239e-05	-0.397966	0.0500117	87.4212	5.54289e-07	-3.63457e-05	6.20517e-05	180	-1.01134	-0.0209004
3	3.1	307	0.552	30.2842	0.54795	1.0372	3.15113	33.2374	-4.18736	-20.8169	0.013918	0.00451893	7.00555e-05	-0.399026	0.0512818	87.7473	5.54289e-07	-3.63457e-05	6.20517e-05	180	-1.01134	-0.0209004
3	3.1	308	0.556	30.8556	0.607153	0.947195	3.14508	33.4764	-3.84171	-20.3727	0.0139505	0.00457774	7.03982e-05	-0.400203	0.0527054	88.1115	5.54289e-07	-3.63457e-05	6.20517e-05	180	-1.01134	-0.0209004
3	3.1	309	0.56	31.427	0.665301	0.874406	3.13611	33.6698	-3.56873	-19.9156	0.013986	0.00464441	7.08166e-05	-0.401502	0.054326	88.5214	5.54289e-07	-3.63457e-05	6.20517e-05	180	-1.01134	-0.0209004
3	3.1	310	0.564	31.9984	0.721872	0.825697	3.1233	33.7992	-3.3895	-19.4387	0.0140245	0.00472052	7.12753e-05	-0.402928	0.0561867	88.9844	5.54289e-07	-3.63457e-05	6.20517e-05	180	-1.01134	-0.0209004
3	3.1	311	0.568	32.5698	0.77634	0.807935	3.10573	33.8464	-3.32508	-18.935	0.0140657	0.00480765	7.17391e-05	-0.404486	0.0583307	89.5081	5.54289e-07	-3.63457e-05	6.20517e-05	180	-1.01134	-0.0209004
3	3.1	312	0.572	33.1412	0.833376	0.809305	3.0787	33.8418	-3.33456	-18.3913	0.0141108	0.00490675	7.22213e-05	-0.406207	0.0607791	90.0994	5.54289e-07	-3.63457e-05	6.20517e-05	180	-1.01134	-0.0209004
3	3.1	313	0.576	33.7126	0.895835	0.812977	3.04068	33.8285	-3.36165	-17.8078	0.0141598	0.00501582	7.27498e-05	-0.408087	0.0634766	90.7486	5.54289e-07	-3.63457e-05	6.20517e-05	180	-1.01134	-0.0209004
3	3.1	314	0.58	34.284	0.960477	0.818294	2.99544	33.8067	-3.40426	-17.1983	0.0142114	0.00513197	7.33103e-05	-0.410073	0.0663518	91.4386	5.54289e-07	-3.63457e-05	6.20517e-05	180	-1.01134	-0.0209004
3	3.1	315	0.584	34.8554	1.02406	0.824597	2.94677	33.7772	-3.46033	-16.5766	0.0142644	0.00525232	7.38888e-05	-0.412116	0.0693339	92.1523	5.54289e-07	-3.63457e-05	6.20517e-05	180	-1.01134	-0.0209004
3	3.1	316	0.588	35.4268	1.08335	0.831229	2.89845	33.7403	-3.52781	-15.9563	0.0143173	0.00537397	7.4471e-05	-0.414164	0.0723515	92.8724	5.54289e-07	-3.63457e-05	6.20517e-05	180	-1.01134	-0.0209004
3	3.1	317	0.592	35.9982	1.13511	0.837532	2.85429	33.6964	-3.60461	-15.3512	0.0143688	0.00549405	7.5043e-05	-0.416168	0.0753334	93.5817	5.54289e-07	-3.63457e-05	6.20517e-05	180	-1.01134	-0.0209004
3	3.1	318	0.596	36.5696	1.17609	0.842848	2.81805	33.6462	-3.68869	-14.775	0.0144177	0.00560967	7.55905e-05	-0.418076	0.0782087	94.2632	5.54289e-07	-3.63457e-05	6.20517e-05	180	-1.01134	-0.0209004
3	3.1	319	0.6	37.141	1.20305	0.846521	2.79354	33.5901	-3.77796	-14.2414	0.0144625	0.00571794	7.60994e-05	-0.419837	0.0809061	94.8996	5.54289e-07	-3.63457e-05	6.20517e-05	180	-1.01134	-0.0209004
3	3.1	320	0.604	37.7124	1.21276	0.847891	2.78452	33.5286	-3.87038	-13.7641	0.0145019	0.00581599	7.65556e-05	-0.421401	0.0833545	95.4737	5.54289e-07	-3.63457e-05	6.20517e-05	180	-1.01134	-0.0209004
3	3.2	253	0.016	80.212	-1.02077	1.80781	3.14371	13.4352	-0.114715	-69.933	-0.00207436	-0.00464099	2.21696e-05	0.408408	-0.114053	75.8538	-1.49239e-06	-0.000146307	-4.04116e-05	178.805	-0.540052	1.01458
3	3.2	254	0.02	81.376	-0.950208	1.85602	3.11062	12.8197	0.244479	-71.5003	-0.00205812	-0.00470326	2.22068e-05	0.411458	-0.118511	76.7358	-1.49338e-06	-0.000146172	-4.12317e-05	177.611	-0.545309	1.01146
3	3.2	255	0.024	82.54	-0.957493	1.88222	3.09148	12.5026	0.235195	-71.7761	-0.0020468	-0.00474866	2.2219e-05	0.413768	-0.121657	77.3828	-1.49375e-06	-0.000146098	-4.18803e-05	177.466	-0.549469	1.00908
3	3.2	256	0.028	83.704	-0.975708	1.9005	3.07521	12.2615	0.211985	-71.8776	-0.00203809	-0.00478716	2.22494e-05	0.415774	-0.124266	77.9258	-1.49467e-06	-0.000145913	-4.25621e-05	177.095	-0.553489	1.00672
3	3.2	257	0.032	84.868	-0.999385	1.91437	3.06205	12.0882	0.181812	-71.8921	-0.00202946	-0.00482358	2.22889e-05	0.417652	-0.126761	78.4407	-1.49588e-06	-0.000145673	-4.32097e-05	176.59	-0.557268	1.00447
3	3.2	258	0.036	86.032	-1.02306	1.92734	3.05225	11.9746	0.151639	-71.9067	-0.00201837	-0.00486275	2.23284e-05	0.419575	-0.129559	79.0034	-1.49709e-06	-0.000145433	-4.37556e-05	176.043	-0.560702	1.0024
3	3.2	259	0.04	87.196	-1.04128	1.94292	3.04604	11.9124	0.128429	-72.0082	-0.00200231	-0.00490952	2.23588e-05	0.42172	-0.133081	79.6895	-1.49801e-06	-0.000145248	-4.41326e-05	175.548	-0.563689	1.00058
3	3.2	260	0.044	88.36	-1.04856	1.9646	3.04367	11.8935	0.119145	-72.2839	-0.00197872	-0.00496869	2.23709e-05	0.424261	-0.137747	80.575	-1.49839e-06	-0.000145175	-4.42733e-05	175.196	-0.566125	0.999086
3	3.2	261	0.048	89.524	-1.04817	1.99015	3.04337	11.9763	0.120697	-72.9587	-0.0019487	-0.0050388	2.23646e-05	0.42716	-0.143409	81.6347	-1.49846e-06	-0.000145155	-4.43279e-05	174.955	-0.568177	0.997819
3	3.2	262	0.052	90.688	-1.04638	2.01537	3.04319	12.2103	0.124907	-74.1127	-0.00191543	-0.00511435	2.23473e-05	0.430235	-0.149569	82.7812	-1.49865e-06	-0.0001451	-4.4476e-05	174.732	-0.570077	0.996629
3	3.2	263	0.056	91.852	-1.04231	2.0408	3.04309	12.5736	0.131111	-75.6165	-0.00187954	-0.00519418	2.23218e-05	0.433445	-0.156125	83.9964	-1.49893e-06	-0.00014502	-4.46943e-05	174.526	-0.571821	0.995523
3	3.2	264	0.06	93.016	-1.03506	2.06699	3.04306	13.0443	0.138645	-77.3404	-0.00184164	-0.00527713	2.22909e-05	0.436749	-0.162976	85.262	-1.49928e-06	-0.000144923	-4.49594e-05	174.338	-0.573406	0.994506
3	3.2	265	0.064	94.18	-1.02374	2.09448	3.04306	13.6005	0.146843	-79.1548	-0.00180236	-0.00536203	2.22573e-05	0.440105	-0.17002	86.56	-1.49965e-06	-0.000144817	-4.52479e-05	174.169	-0.574827	0.993584
3	3.2	266	0.068	95.344	-1.00744	2.12381	3.04305	14.2205	0.155042	-80.93	-0.00176233	-0.00544773	2.22237e-05	0.443471	-0.177155	87.8723	-1.50003e-06	-0.000144711	-4.55364e-05	174.02	-0.57608	0.992762
3	3.2	267	0.072	96.508	-0.985279	2.15553	3.04302	14.8824	0.162575	-82.5363	-0.00172216	-0.00553306	2.21927e-05	0.446807	-0.184278	89.1807	-1.50037e-06	-0.000144614	-4.58015e-05	173.891	-0.577162	0.992047
3	3.2	268	0.076	97.672	-0.956355	2.19018	3.04292	15.5644	0.16878	-83.8442	-0.00168249	-0.00561686	2.21673e-05	0.450071	-0.191288	90.4671	-1.50066e-06	-0.000144534	-4.60199e-05	173.782	-0.578068	0.991443
3	3.2	269	0.08	98.836	-0.919774	2.2283	3.04274	16.2445	0.17299	-84.724	-0.00164395	-0.00569797	2.215e-05	0.453222	-0.198083	91.7134	-1.50085e-06	-0.000144479	-4.6168e-05	173.695	-0.578796	0.990957
3	3.2	270	0.084	0	-0.874639	2.27045	3.04244	16.901	0.174541	-85.0461	-0.00160714	-0.00577522	2.21437e-05	0.456218	-0.204561	92.9015	-1.50092e-06	-0.000144459	-4.62226e-05	173.63	-0.579341	0.990594
3	3.2	271	0.088	1.164	-0.817863	2.31705	3.04057	17.6076	0.00400825	-84.6801	-0.00156963	-0.00584031	2.20904e-05	0.458396	-0.210435	93.9443	-1.50094e-06	-0.000144451	-4.62449e-05	173.598	-0.579604	0.990419
3	3.2	272	0.092	2.328	-0.74866	2.3678	3.03614	18.4281	-0.467094	-83.6561	-0.00154998	-0.00586793	2.20371e-05	0.459122	-0.213168	94.4105	-1.50097e-06	-0.000144442	-4.62672e-05	173.594	-0.579642	0.990394
3	3.2	273	0.096	3.492	-0.669583	2.42209	3.02981	19.3252	-1.17807	-82.0852	-0.00156896	-0.00582761	2.20504e-05	0.457546	-0.209802	93.7915	-1.50097e-06	-0.000144442	-4.62672e-05	173.594	-0.579642	0.990394
3	3.2	274	0.1	4.656	-0.58319	2.47933	3.02221	20.2621	-2.06818	-80.0785	-0.00161903	-0.00572119	2.20855e-05	0.453385	-0.200919	92.1578	-1.50097e-06	-0.000144442	-4.62672e-05	173.594	-0.579642	0.990394
3	3.2	275	0.104	5.82	-0.49204	2.53892	3.014	21.2015	-3.07668	-77.7471	-0.00168991	-0.00557051	2.21352e-05	0.447491	-0.188343	89.8447	-1.50097e-06	-0.000144442	-4.62672e-05	173.594	-0.579642	0.990394
3	3.2	276	0.108	6.984	-0.398686	2.60027	3.00583	22.1065	-4.14291	-75.2021	-0.00177128	-0.00539736	2.21922e-05	0.440716	-0.173896	87.187	-1.50097e-06	-0.000144442	-4.62672e-05	173.594	-0.579642	0.990394
3	3.2	277	0.112	8.148	-0.305686	2.66278	2.99834	22.9401	-5.20611	-72.5545	-0.00185287	-0.00522356	2.22491e-05	0.43391	-0.159402	84.5199	-1.50097e-06	-0.000144442	-4.62672e-05	173.594	-0.579642	0.990394
3	3.2	278	0.116	9.312	-0.215599	2.72584	2.99219	23.665	-6.20553	-69.9155	-0.00192436	-0.00507094	2.22988e-05	0.427925	-0.146683	82.1786	-1.50097e-06	-0.000144442	-4.62672e-05	173.594	-0.579642	0.990394
3	3.2	279	0.12	10.476	-0.130977	2.78888	2.98803	24.2444	-7.08052	-67.3961	-0.00197546	-0.0049613	2.23339e-05	0.423612	-0.137562	80.498	-1.50097e-06	-0.000144442	-4.62672e-05	173.594	-0.579642	0.990394
3	3.2	280	0.124	11.64	-0.0543786	2.85129	2.98649	24.6411	-7.7703	-65.1074	-0.00199589	-0.00491646	2.23472e-05	0.421823	-0.133863	79.8132	-1.50097e-06	-0.000144442	-4.62672e-05	173.594	-0.579642	0.990394
3	3.2	281	0.128	12.804	0.0153911	2.91982	2.98924	24.8843	-8.33435	-62.9329	-0.00199728	-0.00491211	2.23468e-05	0.421618	-0.133542	79.75	-1.50097e-06	-0.000144442	-4.62672e-05	173.594	-0.579642	0.990394
3	3.2	282	0.132	13.968	0.0816518	2.99884	2.99683	25.0415	-8.86867	-60.6926	-0.00199821	-0.0049092	2.23459e-05	0.421481	-0.133327	79.7076	-1.50097e-06	-0.000144442	-4.62672e-05	173.594	-0.579642	0.990394
3	3.2	283	0.136	15.132	0.145024	3.08419	3.00833	25.1328	-9.36736	-58.4024	-0.00199878	-0.00490743	2.23446e-05	0.421398	-0.133196	79.6818	-1.50097e-06	-0.000144442	-4.62672e-05	173.594	-0.579642	0.990394
3	3.2	284	0.14	16.296	0.206129	3.17168	3.02279	25.1784	-9.8245	-56.0785	-0.00199907	-0.00490652	2.23434e-05	0.421355	-0.133129	79.6686	-1.50097e-06	-0.000144442	-4.62672e-05	173.594	-0.579642	0.990394
3	3.2	285	0.144	17.46	0.265592	3.25716	3.03926	25.1983	-10.2342	-53.7367	-0.00199918	-0.00490618	2.23424e-05	0.421339	-0.133105	79.6637	-1.50097e-06	-0.000144442	-4.62672e-05	173.594	-0.579642	0.990394
3	3.2	286	0.148	18.624	0.324034	3.33645	3.0568	25.2126	-10.5906	-51.3931	-0.00199919	-0.00490614	2.2342e-05	0.421337	-0.133101	79.6631	-1.50097e-06	-0.000144442	-4.62672e-05	173.594	-0.579642	0.990394
3	3.2	287	0.152	19.788	0.382075	3.40538	3.07445	25.2416	-10.8877	-49.0638	-0.00199267	-0.00492554	2.235e-05	0.422235	-0.134553	79.9467	-1.50097e-06	-0.000144442	-4.62672e-05	173.594	-0.579642	0.990394
3	3.2	288	0.156	20.952	0.440341	3.45978	3.09128	25.3054	-11.1196	-46.7645	-0.00197833	-0.00496823	2.23677e-05	0.42421	-0.137748	80.5706	-1.50097e-06	-0.000144442	-4.62672e-05	173.594	-0.579642	0.990394
3	3.2	289	0.16	22.116	0.499452	3.49548	3.10633	25.424	-11.2805	-44.5115	-0.00196399	-0.00501092	2.23853e-05	0.426185	-0.140942	81.1946	-1.50097e-06	-0.000144442	-4.62672e-05	173.594	-0.579642	0.990394
3	3.2	290	0.164	23.28	0.56003	3.5083	3.11866	25.6177	-11.3644	-42.3206	-0.00195747	-0.00503032	2.23933e-05	0.427083	-0.142394	81.4782	-1.50097e-06	-0.000144442	-4.62672e-05	173.594	-0.579642	0.990394
3	3.2	291	0.168	24.444	0.623659	3.47546	3.12956	25.9162	-11.4037	-40.1336	-0.00197149	-0.0049818	2.23606e-05	0.424716	-0.13891	80.778	-1.50097e-06	-0.000144442	-4.62672e-05	173.594	-0.579642	0.990394
3	3.2	292	0.172	25.608	0.690572	3.38633	3.14072	26.3154	-11.4351	-37.9014	-0.00200491	-0.00486608	2.22824e-05	0.419071	-0.1306	79.1082	-1.50097e-06	-0.000144442	-4.62672e-05	173.594	-0.579642	0.990394
3	3.2	293	0.176	26.772	0.759365	3.25499	3.15181	26.7841	-11.4596	-35.6541	-0.0020448	-0.00472796	2.21891e-05	0.412334	-0.120682	77.1154	-1.50097e-06	-0.000144442	-4.62672e-05	173.594	-0.579642	0.990394
3	3.2	294	0.18	27.936	0.828642	3.09549	3.16249	27.2911	-11.478	-33.4215	-0.00207823	-0.00461224	2.21109e-05	0.406689	-0.112372	75.4457	-1.50097e-06	-0.000144442	-4.62672e-05	173.594	-0.579642	0.990394
3	3.2	295	0.184	29.1	0.897002	2.92193	3.17244	27.8055	-11.4912	-31.2339	-0.00209224	-0.00456372	2.20781e-05	0.404321	-0.108887	74.7455	-1.50097e-06	-0.000144442	-4.62672e-05	173.594	-0.579642	0.990394
3	3.2	296	0.188	30.264	0.963043	2.74836	3.18133	28.2961	-11.5001	-29.1211	-0.00209194	-0.00456493	2.20926e-05	0.404441	-0.108971	74.7628	-1.50097e-06	-0.000144442	-4.62672e-05	173.594	-0.579642	0.990394
3	3.2	297	0.192	31.428	1.02537	2.58887	3.18882	28.7319	-11.5054	-27.1131	-0.00208984	-0.00457346	2.2127e-05	0.40499	-0.10956	74.8845	-1.50097e-06	-0.000144442	-4.62672e-05	173.594	-0.579642	0.990394
3	3.2	298	0.196	32.592	1.08257	2.45752	3.19458	29.0816	-11.5082	-25.2399	-0.00208415	-0.0045966	2.21682e-05	0.406258	-0.111158	75.2147	-1.50097e-06	-0.000144442	-4.62672e-05	173.594	-0.579642	0.990394
3	3.2	299	0.2	33.756	1.13326	2.36839	3.19828	29.3142	-11.5092	-23.5316	-0.00207305	-0.00464166	2.22027e-05	0.40853	-0.114271	75.8577	-1.50097e-06	-0.000144442	-4.62672e-05	173.594	-0.579642	0.990394
3	3.2	300	0.204	34.92	1.17603	2.33556	3.19959	29.3987	-11.5093	-22.018	-0.00205476	-0.00471596	2.22171e-05	0.412094	-0.119403	76.9178	-1.50097e-06	-0.000144442	-4.62672e-05	173.594	-0.579642	0.990394
3	3.2	301	0.208	36.084	1.20754	2.33681	3.19451	29.3963	-11.4397	-20.6796	-0.00202268	-0.00482067	2.21941e-05	0.416864	-0.127041	78.4405	-1.50097e-06	-0.000144442	-4.62672e-05	173.594	-0.579642	0.990394
3	3.2	302	0.212	37.248	1.22738	2.3402	3.18072	29.3897	-11.2468	-19.4741	-0.00197322	-0.00494892	2.21316e-05	0.422416	-0.137047	80.3528	-1.50097e-06	-0.000144442	-4.62672e-05	173.594	-0.579642	0.990394
3	3.2	303	0.216	38.412	1.23857	2.3452	3.1604	29.3801	-10.9549	-18.3982	-0.00190913	-0.00509588	2.20395e-05	0.428534	-0.148989	82.581	-1.50097e-06	-0.000144442	-4.62672e-05	173.594	-0.579642	0.990394
3	3.2	304	0.22	39.576	1.2441	2.35127	3.13572	29.3684	-10.5882	-17.4482	-0.00183313	-0.00525675	2.19276e-05	0.434999	-0.162437	85.0513	-1.50097e-06	-0.000144442	-4.62672e-05	173.594	-0.579642	0.990394
3	3.2	305	0.224	40.74	1.24698	2.35788	3.10887	29.3556	-10.1709	-16.6208	-0.00174795	-0.00542671	2.18059e-05	0.441594	-0.176957	87.6901	-1.50097e-06	-0.000144442	-4.62672e-05	173.594	-0.579642	0.990394
3	3.2	306	0.228	41.904	1.25022	2.36449	3.08201	29.3429	-9.72717	-15.9123	-0.00165634	-0.00560096	2.16842e-05	0.448102	-0.192119	90.4237	-1.50097e-06	-0.000144442	-4.62672e-05	173.594	-0.579642	0.990394
3	3.2	307	0.232	43.068	1.25683	2.37056	3.05733	29.3312	-9.28129	-15.3193	-0.00156103	-0.00577467	2.15723e-05	0.454306	-0.20749	93.1783	-1.50097e-06	-0.000144442	-4.62672e-05	173.594	-0.579642	0.990394
3	3.2	308	0.236	44.232	1.26981	2.37556	3.03701	29.3215	-8.85743	-14.8383	-0.00146475	-0.00594303	2.14802e-05	0.459987	-0.222638	95.8802	-1.50097e-06	-0.000144442	-4.62672e-05	173.594	-0.579642	0.990394
3	3.2	309	0.24	45.396	1.29216	2.37896	3.02322	29.315	-8.47978	-14.4658	-0.00137023	-0.00610124	2.14177e-05	0.464928	-0.237132	98.4559	-1.50097e-06	-0.000144442	-4.62672e-05	173.594	-0.579642	0.990394
3	3.2	310	0.244	46.56	1.3269	2.38021	3.01814	29.3126	-8.17257	-14.1982	-0.0012802	-0.00624448	2.13947e-05	0.468912	-0.25054	100.831	-1.50097e-06	-0.000144442	-4.62672e-05	173.594	-0.579642	0.990394
3	3.2	311	0.248	47.724	1.38475	2.36214	3.02773	29.4442	-7.96852	-14.0419	-0.00118875	-0.00637061	2.12454e-05	0.471804	-0.263129	103.023	-1.50097e-06	-0.000144442	-4.62672e-05	173.594	-0.579642	0.990394
3	3.2	312	0.252	48.888	1.46765	2.31438	3.05371	29.7732	-7.85183	-13.9769	-0.0010897	-0.00648299	2.08721e-05	0.473743	-0.275472	105.111	-1.50097e-06	-0.000144442	-4.62672e-05	173.594	-0.579642	0.990394
3	3.2	313	0.256	50.052	1.56548	2.24658	3.09193	30.2009	-7.77389	-13.96	-0.000985416	-0.00658498	2.03869e-05	0.474919	-0.287597	107.121	-1.50097e-06	-0.000144442	-4.62672e-05	173.594	-0.579642	0.990394
3	3.2	314	0.26	51.216	1.66807	2.16841	3.13821	30.6286	-7.68608	-13.948	-0.000878284	-0.00667994	1.99017e-05	0.475523	-0.299531	109.078	-1.50097e-06	-0.000144442	-4.62672e-05	173.594	-0.579642	0.990394
3	3.2	315	0.264	52.38	1.76528	2.08952	3.18841	30.9576	-7.53979	-13.8975	-0.00077067	-0.00677125	1.95285e-05	0.475746	-0.311301	111.008	-1.50097e-06	-0.000144442	-4.62672e-05	173.594	-0.579642	0.990394
3	3.2	316	0.268	53.544	1.84697	2.01957	3.23834	31.0892	-7.28641	-13.7656	-0.000664947	-0.00686228	1.93792e-05	0.475778	-0.322936	112.934	-1.50097e-06	-0.000144442	-4.62672e-05	173.594	-0.579642	0.990394
3	3.2	317	0.272	54.708	1.91563	1.95232	3.30682	30.8604	-6.73822	-13.5267	-0.000556875	-0.00695005	1.91176e-05	0.475446	-0.334546	114.87	-1.50097e-06	-0.000144442	-4.62672e-05	173.594	-0.579642	0.990394
3	3.2	318	0.276	55.872	1.97495	1.88067	3.39453	30.3568	-5.95224	-13.1958	-0.000445353	-0.0070295	1.85421e-05	0.474626	-0.345935	116.767	-1.50097e-06	-0.000144442	-4.62672e-05	173.594	-0.579642	0.990394
3	3.2	319	0.28	57.036	2.01664	1.81298	3.47013	29.8533	-5.24706	-12.79	-0.00033748	-0.00710093	1.79666e-05	0.473577	-0.356663	118.554	-1.50097e-06	-0.000144442	-4.62672e-05	173.594	-0.579642	0.990394
3	3.2	320	0.284	58.2	2.03239	1.75765	3.5023	29.6245	-4.94121	-12.3265	-0.000240357	-0.00716463	1.7705e-05	0.472558	-0.366289	120.16	-1.50097e-06	-0.000144442	-4.62672e-05	173.594	-0.579642	0.990394
3	3.2	321	0.288	59.364	2.03155	1.71174	3.50095	29.9273	-5.16928	-11.8395	-0.000148489	-0.00722165	1.7484e-05	0.471323	-0.375222	121.66	-1.50097e-06	-0.000144442	-4.62672e-05	173.594	-0.579642	0.990394
3	3.2	322	0.292	60.528	2.02811	1.66687	3.49695	30.7492	-5.8012	-11.3497	-7.15204e-05	-0.00726475	1.70735e-05	0.469988	-0.382458	122.881	-1.50097e-06	-0.000144442	-4.62672e-05	173.594	-0.579642	0.990394
3	3.2	323	0.296	61.692	2.02073	1.62326	3.49039	31.9604	-6.75855	-10.8539	-3.92448e-05	-0.00728181	1.68525e-05	0.469363	-0.385438	123.385	-1.50097e-06	-0.000144442	-4.62672e-05	173.594	-0.579642	0.990394
3	3.2	324	0.3	62.856	2.00804	1.5811	3.48134	33.4312	-7.96295	-10.349	-6.67011e-05	-0.00727177	1.70297e-05	0.469697	-0.383141	123.019	-1.50097e-06	-0.000144442	-4.62672e-05	173.594	-0.579642	0.990394
3	3.2	325	0.304	64.02	1.98867	1.54062	3.46988	35.0318	-9.33599	-9.83183	-0.000141817	-0.00724044	1.74866e-05	0.470559	-0.376651	121.975	-1.50097e-06	-0.000144442	-4.62672e-05	173.594	-0.579642	0.990394
3	3.2	326	0.308	65.184	1.96128	1.502	3.45609	36.6323	-10.7992	-9.29932	-0.000253709	-0.00718601	1.81113e-05	0.471736	-0.366572	120.338	-1.50097e-06	-0.000144442	-4.62672e-05	173.594	-0.579642	0.990394
3	3.2	327	0.312	66.348	1.92449	1.46547	3.44005	38.1031	-12.2743	-8.74829	-0.000391505	-0.0071067	1.87919e-05	0.47302	-0.353504	118.19	-1.50097e-06	-0.000144442	-4.62672e-05	173.594	-0.579642	0.990394
3	3.2	328	0.316	67.512	1.87695	1.43123	3.42183	39.3144	-13.6828	-8.17562	-0.000544321	-0.0070007	1.94166e-05	0.474198	-0.33805	115.616	-1.50097e-06	-0.000144442	-4.62672e-05	173.594	-0.579642	0.990394
3	3.2	329	0.32	68.676	1.8173	1.39948	3.40152	40.1363	-14.9463	-7.57819	-0.000701274	-0.0068662	1.98735e-05	0.475059	-0.320813	112.698	-1.50097e-06	-0.000144442	-4.62672e-05	173.594	-0.579642	0.990394
3	3.2	330	0.324	69.84	1.74418	1.37044	3.37918	40.4391	-15.9863	-6.95283	-0.000851493	-0.00670141	2.00507e-05	0.475393	-0.302394	109.52	-1.50097e-06	-0.000144442	-4.62672e-05	173.594	-0.579642	0.990394
3	3.2	331	0.328	71.004	1.64366	1.34558	3.35253	39.8827	-16.7387	-6.17702	-0.0010065	-0.00650203	2.01723e-05	0.473762	-0.281825	105.97	-1.50097e-06	-0.000144442	-4.62672e-05	173.594	-0.579642	0.990394
3	3.2	332	0.332	72.168	1.50919	1.32591	3.31992	38.4479	-17.2638	-5.20662	-0.00117979	-0.00626824	2.0486e-05	0.469122	-0.25825	101.933	-1.50097e-06	-0.000144442	-4.62672e-05	173.594	-0.579642	0.990394
3	3.2	333	0.336	73.332	1.35046	1.31094	3.28246	36.486	-17.6702	-4.15602	-0.00136349	-0.00600492	2.0915e-05	0.461851	-0.232433	97.4974	-1.50118e-06	-0.000144359	-4.64763e-05	173.472	-0.580654	0.989706
3	3.2	334	0.34	74.496	1.17719	1.30017	3.24124	34.3484	-18.0663	-3.13968	-0.00154969	-0.00571697	2.13824e-05	0.452325	-0.205144	92.7473	-1.50168e-06	-0.000144159	-4.6975e-05	173.162	-0.583221	0.987959
3	3.2	335	0.344	75.66	0.999068	1.29309	3.19735	32.3866	-18.5608	-2.27205	-0.0017305	-0.00540929	2.18113e-05	0.440923	-0.177149	87.7688	-1.50228e-06	-0.000143922	-4.75701e-05	172.75	-0.586633	0.985632
3	3.2	336	0.348	76.824	0.825801	1.28921	3.15188	30.9518	-19.2623	-1.66754	-0.00189802	-0.00508676	2.21251e-05	0.428022	-0.149217	82.6472	-1.50279e-06	-0.000143722	-4.80688e-05	172.321	-0.590183	0.983203
3	3.2	337	0.352	77.988	0.66709	1.28803	3.10594	30.3954	-20.2793	-1.44061	-0.00204436	-0.00475429	2.22467e-05	0.413999	-0.122113	77.4681	-1.503e-06	-0.000143639	-4.82779e-05	171.96	-0.593165	0.981149
